# Supplementary material for: Interpretation of the pressure-induced Raman frequency shift of the ν1 stretching bands of CH4 and N2 within CH4–CO2, N2–CO2 and CH4–N2 binary mixtures
Source: Royal Society of Chemistry journal article supplement (doi:10.1039/d1cp00163a), 2021-01-01
Supplement: d1cp00163a1.xlsx [file d1cp00163a1.xlsx]

## Sheet: PHF calculation of CH4-N2
Experimental data are from Le et al. 2020 and Fabre and Oksengorn 1993								All parameters and detailed calculation process can be found in the work of Ben-Amotz et al. 1993
CH4 mol%	Pressure	Density	Peak shift_CH4	Intermolecular distance	CH4 mol%	P		xk (k=3)	xk (k=2)	xk (k=1)	xk (k=0)	I1	I2	I3	I4	I5	C1	C2	C3	C4	C5	C (BMCSL)	Sij	yij (sij) (contact)	slope (CH4 => =0)	ln yij (rij < aij) = ln yii(0)	a12	B11	B22	B12 (1/Å)	s12 (Å)		C12 (1/Å^3)	D12 (Å)	A12		FR (J/Å)	GR (J/Å^2)	k	f1(k)	f2(k)		DnR/ n0	DnR	DnA		DnA (linear)	shift net (predict)
1	5.57543	0.0036816	0	19.3248	1	3.14159		0.00334346	0.000932624	0.000260146	7.25652e-05	0.00336594	5.6395e-06	1.25843e-08	3.15774e-11	8.45591e-14	4.2456	-4.61524	2.11892	-0.324521	0	2.3311	1.36289	1.0072	0	0.0142644	0.655	-0.00129576	-0.000512486	-0.000904124	2.875		-0.000242779	-0.000521951	0.0157217		5.61405e-24	5.04112e-24	40.5265	1.06103	1.31766		4.98529e-06	0.0145421	-0.0145421		-0.112506	-0.0979639
1	16.0829	0.010823	-0.17667	13.49	1	3.14159		0.00982894	0.00274168	0.000764766	0.000213324	0.0100254	4.95938e-05	3.26038e-07	2.40819e-09	1.89609e-11	4.2456	-4.61524	2.11892	-0.324521	0	2.32678	1.36289	1.02139	0	0.0423355	0.655	-0.00373776	-0.00147832	-0.00260804	2.875		-0.000731305	-0.00152273	0.0465741		1.65999e-23	1.50244e-23	40.5265	1.06103	1.31766		1.47717e-05	0.043089	-0.219759		-0.33074	-0.287651
1	31.0936	0.0215	-0.47333	10.7312	1	3.14159		0.0195253	0.00544638	0.00151921	0.00042377	0.0203133	0.000200918	2.63246e-06	3.87012e-08	6.06107e-10	4.2456	-4.61524	2.11892	-0.324521	0	2.32032	1.36289	1.04321	0	0.0853205	0.655	-0.00722633	-0.00285808	-0.00504221	2.875		-0.0015054	-0.0029945	0.093618		3.32914e-23	3.04735e-23	40.5265	1.06103	1.31766		2.97141e-05	0.086676	-0.560006		-0.657018	-0.570343
1	45.5039	0.032286	-0.79167	9.37105	1	3.14159		0.0293206	0.0081787	0.00228137	0.000636364	0.0311279	0.000465397	9.18694e-06	2.03222e-07	4.78571e-09	4.2456	-4.61524	2.11892	-0.324521	0	2.31379	1.36289	1.06601	0	0.130028	0.655	-0.0105754	-0.00418265	-0.00737901	2.875		-0.00234126	-0.00445859	0.142326		5.0529e-23	4.67495e-23	40.5265	1.06103	1.31766		4.52293e-05	0.131934	-0.923604		-0.986628	-0.854694
1	61.8155	0.045121	-1.14333	8.38173	1	3.14159		0.0409768	0.0114301	0.0031883	0.000889345	0.0445793	0.000938826	2.60019e-05	8.05744e-07	2.656e-08	4.2456	-4.61524	2.11892	-0.324521	0	2.30602	1.36289	1.09417	0	0.184988	0.655	-0.0143663	-0.00568199	-0.0100241	2.875		-0.00340771	-0.0061823	0.20195		7.16157e-23	6.70472e-23	40.5265	1.06103	1.31766		6.431e-05	0.187592	-1.33092		-1.37885	-1.19126
1	81.5296	0.061443	-1.59333	7.56198	1	3.14159		0.0557996	0.0155648	0.00434163	0.00121106	0.0626585	0.00181504	6.87987e-05	2.91195e-06	1.30976e-07	4.2456	-4.61524	2.11892	-0.324521	0	2.29613	1.36289	1.13171	0	0.257791	0.655	-0.0189479	-0.00749408	-0.013221	2.875		-0.00487916	-0.00836636	0.280595		9.94905e-23	9.44234e-23	40.5265	1.06103	1.31766		8.96752e-05	0.261583	-1.85491		-1.87764	-1.61605
1	102.044	0.079156	-2.07167	6.94969	1	3.14159		0.0718858	0.0200518	0.00559325	0.00156018	0.0836075	0.00315441	0.000154883	8.47342e-06	4.92094e-07	4.2456	-4.61524	2.11892	-0.324521	0	2.28541	1.36289	1.17477	0	0.340731	0.655	-0.0237157	-0.00937976	-0.0165477	2.875		-0.00662658	-0.0107585	0.369857		1.31327e-22	1.2628e-22	40.5265	1.06103	1.31766		0.0001188	0.346538	-2.41821		-2.41893	-2.07239
1	131.965	0.10549	-2.77167	6.31523	1	3.14159		0.0958011	0.0267227	0.00745404	0.00207923	0.117573	0.0060093	0.000396458	2.90498e-05	2.2559e-06	4.2456	-4.61524	2.11892	-0.324521	0	2.26947	1.36289	1.24366	0	0.472266	0.655	-0.0306695	-0.0121301	-0.0213998	2.875		-0.00952717	-0.0144418	0.511009		1.82369e-22	1.78227e-22	40.5265	1.06103	1.31766		0.00016572	0.483406	-3.25508		-3.22367	-2.74026
1	161.587	0.13073	-3.41167	5.87942	1	3.14159		0.118723	0.0331165	0.00923753	0.00257672	0.15368	0.00988928	0.000814974	7.4362e-05	7.17981e-06	4.2456	-4.61524	2.11892	-0.324521	0	2.25418	1.36289	1.31577	0	0.608527	0.655	-0.0375537	-0.0148528	-0.0262032	2.875		-0.0126661	-0.0182359	0.65709		2.36399e-22	2.3382e-22	40.5265	1.06103	1.31766		0.000215546	0.628748	-4.04042		-3.99498	-3.36623
1	202.416	0.16183	-4.17	5.47571	1	3.14159		0.146966	0.0409948	0.0114351	0.00318971	0.203674	0.016546	0.00170465	0.000193706	2.32472e-05	4.2456	-4.61524	2.11892	-0.324521	0	2.23536	1.36289	1.41387	0	0.791904	0.655	-0.0470426	-0.0186058	-0.0328242	2.875		-0.017051	-0.0234978	0.85407		3.11637e-22	3.11356e-22	40.5265	1.06103	1.31766		0.000284961	0.831231	-5.00123		-4.94536	-4.11413
1	252.852	0.19296	-4.88	5.16381	1	3.14159		0.175237	0.0488807	0.0136348	0.00380328	0.26081	0.0257689	0.0031972	0.00043586	6.26325e-05	4.2456	-4.61524	2.11892	-0.324521	0	2.21651	1.36289	1.52381	0	0.995	0.655	-0.0587642	-0.0232418	-0.041003	2.875		-0.0220526	-0.0297685	1.0735		3.99144e-22	4.00669e-22	40.5265	1.06103	1.31766		0.000365469	1.06607	-5.94607		-5.89666	-4.83059
1	302.687	0.21694	-5.39167	4.96607	1	3.14159		0.197015	0.0549553	0.0153292	0.00427594	0.310474	0.0350222	0.00492325	0.000758188	0.000122893	4.2456	-4.61524	2.11892	-0.324521	0	2.20199	1.36289	1.61769	0	1.1667	0.655	-0.0703462	-0.0278226	-0.0490844	2.875		-0.0263475	-0.0356072	1.26062		4.77138e-22	4.78835e-22	40.5265	1.06103	1.31766		0.00043685	1.27429	-6.66596		-6.62947	-5.35518
1	352.122	0.23589	-5.78333	4.82936	1	3.14159		0.214224	0.0597557	0.0166683	0.00464944	0.353708	0.0439173	0.00675442	0.00113538	0.000200633	4.2456	-4.61524	2.11892	-0.324521	0	2.19052	1.36289	1.69827	0	1.31296	0.655	-0.0818353	-0.0323666	-0.0571009	2.875		-0.0300224	-0.0410757	1.42151		5.46842e-22	5.47251e-22	40.5265	1.06103	1.31766		0.000500268	1.45928	-7.24261		-7.20856	-5.74928
1	402.658	0.25177	-6.07667	4.72562	1	3.14159		0.228646	0.0637784	0.0177904	0.00496244	0.392968	0.0526144	0.00868172	0.00156262	0.000295378	4.2456	-4.61524	2.11892	-0.324521	0	2.1809	1.36289	1.7706	0	1.44345	0.655	-0.0935801	-0.0370118	-0.065296	2.875		-0.0332957	-0.046399	1.56641		6.11768e-22	6.09657e-22	40.5265	1.06103	1.31766		0.000558994	1.63059	-7.70726		-7.69384	-6.06325
1	451.793	0.26478	-6.30667	4.64691	1	3.14159		0.240461	0.0670741	0.0187097	0.00521887	0.427392	0.0606908	0.010577	0.00200746	0.000399809	4.2456	-4.61524	2.11892	-0.324521	0	2.17303	1.36289	1.8334	0	1.55619	0.655	-0.104999	-0.0415282	-0.0732638	2.875		-0.036109	-0.0513709	1.69276		6.70063e-22	6.64582e-22	40.5265	1.06103	1.31766		0.000611433	1.78355	-8.09022		-8.09141	-6.30786
1	461.1	0.26703	-6.345	4.63383	1	3.14159		0.242504	0.0676441	0.0188686	0.00526322	0.433565	0.0621814	0.0109369	0.00209439	0.000420801	4.2456	-4.61524	2.11892	-0.324521	0	2.17166	1.36289	1.84461	0	1.57626	0.655	-0.107162	-0.0423837	-0.074773	2.875		-0.0366076	-0.0522937	1.71536		6.80656e-22	6.7445e-22	40.5265	1.06103	1.31766		0.000620933	1.81126	-8.15626		-8.16017	-6.34891
1	502.43	0.27632	-6.495	4.5813	1	3.14159		0.250941	0.0699974	0.0195251	0.00544633	0.459771	0.0686479	0.0125327	0.00248822	0.00051801	4.2456	-4.61524	2.11892	-0.324521	0	2.16604	1.36289	1.89198	0	1.66093	0.655	-0.116767	-0.0461826	-0.0814751	2.875		-0.0387021	-0.0563256	1.81116		7.26131e-22	7.16413e-22	40.5265	1.06103	1.31766		0.00066161	1.92992	-8.42492		-8.44406	-6.51415
1	527.748	0.28153	-6.57833	4.55287	1	3.14159		0.255672	0.0713172	0.0198932	0.00554902	0.474992	0.0725036	0.0135094	0.00273567	0.000580697	4.2456	-4.61524	2.11892	-0.324521	0	2.16289	1.36289	1.91936	0	1.70974	0.655	-0.122652	-0.0485098	-0.0855807	2.875		-0.0399027	-0.05875	1.86671		7.52909e-22	7.40834e-22	40.5265	1.06103	1.31766		0.000685486	1.99956	-8.57789		-8.60328	-6.60371
1	549.563	0.28577	-6.64167	4.53024	1	3.14159		0.259523	0.0723913	0.0201928	0.00563259	0.487668	0.0757689	0.0143506	0.00295237	0.000636523	4.2456	-4.61524	2.11892	-0.324521	0	2.16032	1.36289	1.94209	0	1.7502	0.655	-0.127722	-0.0505151	-0.0891183	2.875		-0.0408935	-0.0608149	1.91291		7.75411e-22	7.61196e-22	40.5265	1.06103	1.31766		0.000705509	2.05797	-8.69964		-8.73285	-6.67488
1	557.569	0.28727	-6.67033	4.52234	1	3.14159		0.260885	0.0727713	0.0202988	0.00566216	0.492216	0.0769523	0.0146585	0.00303249	0.000657371	4.2456	-4.61524	2.11892	-0.324521	0	2.15941	1.36289	1.95023	0	1.76467	0.655	-0.129582	-0.0512509	-0.0904166	2.875		-0.0412468	-0.0615669	1.92948		7.83534e-22	7.68508e-22	40.5265	1.06103	1.31766		0.000712727	2.07902	-8.74935		-8.77868	-6.69966
1	600	0.29479	-6.80102	4.48355	1	3.14159		0.267714	0.0746763	0.0208302	0.00581038	0.515529	0.0831145	0.0162874	0.00346309	0.000771206	4.2456	-4.61524	2.11892	-0.324521	0	2.15486	1.36289	1.99181	0	1.83853	0.655	-0.139443	-0.0551512	-0.0972973	2.875		-0.0430407	-0.0655095	2.01436		8.25555e-22	8.06035e-22	40.5265	1.06103	1.31766		0.000749988	2.18772	-8.98874		-9.00849	-6.82077
1	800	0.3231		4.34858	1	3.14159		0.293424	0.0818478	0.0228306	0.00636837	0.611603	0.110099	0.0238721	0.0055964	0.00137165	4.2456	-4.61524	2.11892	-0.324521	0	2.13772	1.36289	2.16098	0	2.13725	0.655	-0.185925	-0.0735349	-0.12973	2.875		-0.0501191	-0.0833324	2.36354		1.0056e-21	9.61465e-22	40.5265	1.06103	1.31766		0.000908238	2.64933			-9.87361	-7.22428
1	1000	0.34415		4.25805	1	3.14159		0.312541	0.0871801	0.024318	0.00678327	0.692645	0.134668	0.0313226	0.00785658	0.00205752	4.2456	-4.61524	2.11892	-0.324521	0	2.12497	1.36289	2.3012	0	2.38299	0.655	-0.232406	-0.0919186	-0.162162	2.875		-0.0556935	-0.100325	2.65802		1.16595e-21	1.09346e-21	40.5265	1.06103	1.31766		0.0010475	3.05557			-10.5169	-7.46131
1	1200	0.361		4.19074	1	3.14159		0.327843	0.0914486	0.0255087	0.00711539	0.764324	0.157627	0.0386781	0.0102135	0.00281289	4.2456	-4.61524	2.11892	-0.324521	0	2.11477	1.36289	2.42352	0	2.59617	0.655	-0.278887	-0.110302	-0.194595	2.875		-0.0603272	-0.116798	2.9189		1.314e-21	1.2108e-21	40.5265	1.06103	1.31766		0.0011749	3.42717			-11.0318	-7.60462
1	1400	0.37512		4.13748	1	3.14159		0.340666	0.0950255	0.0265064	0.0073937	0.829622	0.179459	0.0459781	0.0126547	0.00362938	4.2456	-4.61524	2.11892	-0.324521	0	2.10622	1.36289	2.53367	0	2.78732	0.655	-0.325368	-0.128686	-0.227027	2.875		-0.0643172	-0.132915	3.15702		1.45361e-21	1.31811e-21	40.5265	1.06103	1.31766		0.00129416	3.77508			-11.4633	-7.68821
1	1600	0.38732		4.09358	1	3.14159		0.351746	0.098116	0.0273685	0.00763416	0.890276	0.200461	0.0532512	0.0151736	0.00450182	4.2456	-4.61524	2.11892	-0.324521	0	2.09884	1.36289	2.63499	0	2.96249	0.655	-0.371849	-0.14707	-0.259459	2.875		-0.0678373	-0.148773	3.37863		1.58708e-21	1.4181e-21	40.5265	1.06103	1.31766		0.0014075	4.10568			-11.8361	-7.73044
1	1800	0.39809		4.05632	1	3.14159		0.361527	0.100844	0.0281295	0.00784644	0.947375	0.220828	0.0605161	0.0177652	0.00542639	4.2456	-4.61524	2.11892	-0.324521	0	2.09232	1.36289	2.72954	0	3.12547	0.655	-0.41833	-0.165453	-0.291892	2.875		-0.0709963	-0.164432	3.58765		1.71582e-21	1.51246e-21	40.5265	1.06103	1.31766		0.00151628	4.42298			-12.1652	-7.74225
1	2000	0.40775		4.02404	1	3.14159		0.370299	0.103291	0.0288121	0.00803684	1.00165	0.24069	0.0677852	0.0204257	0.00640011	4.2456	-4.61524	2.11892	-0.324521	0	2.08647	1.36289	2.81872	0	3.27877	0.655	-0.464811	-0.183837	-0.324324	2.875		-0.0738677	-0.179932	3.78667		1.84079e-21	1.60234e-21	40.5265	1.06103	1.31766		0.00162143	4.7297			-12.4604	-7.73073
1	2200	0.41653		3.99556	1	3.14159		0.378273	0.105515	0.0294325	0.0082099	1.05368	0.260164	0.075075	0.0231546	0.00742171	4.2456	-4.61524	2.11892	-0.324521	0	2.08115	1.36289	2.90359	0	3.42433	0.655	-0.511293	-0.202221	-0.356757	2.875		-0.0765087	-0.195305	3.97768		1.96275e-21	1.68863e-21	40.5265	1.06103	1.31766		0.00172366	5.02793			-12.7287	-7.70081
1	2400	0.4246		3.97008	1	3.14159		0.385602	0.10756	0.0300027	0.00836896	1.1039	0.27935	0.0824035	0.025954	0.0084911	4.2456	-4.61524	2.11892	-0.324521	0	2.07627	1.36289	2.985	0	3.56366	0.655	-0.557774	-0.220605	-0.389189	2.875		-0.0789648	-0.210575	4.16226		2.08229e-21	1.77204e-21	40.5265	1.06103	1.31766		0.00182357	5.31936			-12.9754	-7.65599
1	2600	0.43206		3.9471	1	3.14159		0.392377	0.10945	0.0305299	0.008516	1.15252	0.298261	0.0897603	0.028816	0.00960455	4.2456	-4.61524	2.11892	-0.324521	0	2.07175	1.36289	3.06331	0	3.69743	0.655	-0.604255	-0.238988	-0.421622	2.875		-0.0812545	-0.225754	4.34109		2.19965e-21	1.85286e-21	40.5265	1.06103	1.31766		0.00192138	5.60466			-13.2033	-7.59867
1	2800	0.43901		3.92616	1	3.14159		0.398688	0.11121	0.0310209	0.00865298	1.1998	0.316963	0.0971583	0.0317424	0.0107622	4.2456	-4.61524	2.11892	-0.324521	0	2.06754	1.36289	3.13904	0	3.82658	0.655	-0.650736	-0.257372	-0.454054	2.875		-0.0834064	-0.240856	4.51514		2.31521e-21	1.93153e-21	40.5265	1.06103	1.31766		0.00201744	5.88488			-13.4157	-7.53083
1	3000	0.44553		3.90692	1	3.14159		0.404609	0.112862	0.0314817	0.00878149	1.246	0.335519	0.104612	0.0347364	0.0119648	4.2456	-4.61524	2.11892	-0.324521	0	2.06359	1.36289	3.21264	0	3.95189	0.655	-0.697217	-0.275756	-0.486486	2.875		-0.085445	-0.255896	4.68523		2.42928e-21	2.00843e-21	40.5265	1.06103	1.31766		0.00211208	6.16093			-13.615	-7.45402
0.9	5.7	0.0040409	0	19.1912	0.9	3.14159		0.00337633	0.000945137	0.000264606	7.40903e-05	0.00339926	5.75145e-06	1.29604e-08	3.28413e-11	8.89011e-14	4.26316	-4.61039	2.10864	-0.321414	0	2.33108	1.36289	1.00728	0	0.0144651	0.655	-0.00132471	-0.000523936	-0.000924324	2.875		-0.000246356	-0.000532593	0.0159529		5.7153e-24	5.12497e-24	40.5265	1.06103	1.31766		5.07336e-06	0.014799	-0.014799
0.9	15.7	0.011309	-0.17833	13.6182	0.9	3.14159		0.00944911	0.00264509	0.000740535	0.000207352	0.00963054	4.5788e-05	2.89349e-07	2.05445e-09	1.55497e-11	4.26316	-4.61039	2.10864	-0.321414	0	2.32703	1.36289	1.02059	0	0.040846	0.655	-0.00364877	-0.00144312	-0.00254595	2.875		-0.000705083	-0.00148161	0.0449737		1.60893e-23	1.45294e-23	40.5265	1.06103	1.31766		1.43088e-05	0.0417387	-0.220069
0.9	31.4	0.023184	-0.48	10.7201	0.9	3.14159		0.0193711	0.00542257	0.00151813	0.000425081	0.0201466	0.000197676	2.56939e-06	3.74746e-08	5.82251e-10	4.26316	-4.61039	2.10864	-0.321414	0	2.32042	1.36289	1.04294	0	0.084982	0.655	-0.00729754	-0.00288624	-0.00509189	2.875		-0.00149818	-0.00301183	0.0933364		3.33308e-23	3.04302e-23	40.5265	1.06103	1.31766		2.97286e-05	0.0867182	-0.566718
0.9	47.4	0.035864	-0.8	9.26922	0.9	3.14159		0.0299658	0.00838833	0.00234844	0.00065757	0.0318556	0.000486968	9.82639e-06	2.22179e-07	5.34772e-09	4.26316	-4.61039	2.10864	-0.321414	0	2.31336	1.36289	1.06767	0	0.133581	0.655	-0.011016	-0.00435694	-0.00768649	2.875		-0.00240562	-0.00462605	0.146354		5.21999e-23	4.81802e-23	40.5265	1.06103	1.31766		4.66949e-05	0.136209	-0.936209
0.9	61.8	0.047749	-1.1025	8.42574	0.9	3.14159		0.0398962	0.0111681	0.0031267	0.000875482	0.0433047	0.000887285	2.39176e-05	7.21453e-07	2.31509e-08	4.26316	-4.61039	2.10864	-0.321414	0	2.30674	1.36289	1.09169	0	0.180574	0.655	-0.0143627	-0.00568057	-0.0100216	2.875		-0.00331398	-0.00612946	0.197427		7.0382e-23	6.55833e-23	40.5265	1.06103	1.31766		6.31216e-05	0.184126	-1.28663
0.9	81.8	0.064901	-1.52083	7.60639	0.9	3.14159		0.0542273	0.0151799	0.00424984	0.00118997	0.0606868	0.00170657	6.28309e-05	2.58359e-06	1.12908e-07	4.26316	-4.61039	2.10864	-0.321414	0	2.29718	1.36289	1.12789	0	0.250981	0.655	-0.0190108	-0.00751894	-0.0132649	2.875		-0.00472578	-0.00830048	0.27367		9.7601e-23	9.20946e-23	40.5265	1.06103	1.31766		8.78324e-05	0.256207	-1.77704
0.9	100.6	0.08152	-1.92333	7.04976	0.9	3.14159		0.0681132	0.0190669	0.00533809	0.00149468	0.0785642	0.00280136	0.000130161	6.74198e-06	3.70797e-07	4.26316	-4.61039	2.10864	-0.321414	0	2.28792	1.36289	1.16477	0	0.322288	0.655	-0.02338	-0.00924701	-0.0163135	2.875		-0.00621059	-0.0104283	0.35064		1.25251e-22	1.19472e-22	40.5265	1.06103	1.31766		0.000113051	0.32977	-2.2531
0.9	131.9	0.10948	-2.5625	6.38976	0.9	3.14159		0.0914748	0.0256066	0.00716896	0.00200733	0.111163	0.00540896	0.00034023	2.37825e-05	1.76238e-06	4.26316	-4.61039	2.10864	-0.321414	0	2.27235	1.36289	1.23122	0	0.449676	0.655	-0.0306543	-0.0121241	-0.0213892	2.875		-0.00897909	-0.0141346	0.487789		1.75166e-22	1.69673e-22	40.5265	1.06103	1.31766		0.00015878	0.46316	-3.02566
0.9	161.8	0.13534	-3.1375	5.9537	0.9	3.14159		0.113082	0.031655	0.00886233	0.00248147	0.144447	0.00881898	0.000690887	5.99728e-05	5.51091e-06	4.26316	-4.61039	2.10864	-0.321414	0	2.25795	1.36289	1.29806	0	0.576578	0.655	-0.0376032	-0.0148724	-0.0262378	2.875		-0.0118577	-0.0178044	0.624278		2.25911e-22	2.21272e-22	40.5265	1.06103	1.31766		0.000205416	0.599197	-3.7367
0.9	200.4	0.16568	-3.7725	5.56552	0.9	3.14159		0.138432	0.0387513	0.010849	0.00303776	0.187874	0.0142909	0.00138268	0.000147725	1.66785e-05	4.26316	-4.61039	2.10864	-0.321414	0	2.24105	1.36289	1.3839	0	0.737916	0.655	-0.0465741	-0.0184205	-0.0324973	2.875		-0.0156496	-0.0225837	0.798079		2.92412e-22	2.89066e-22	40.5265	1.06103	1.31766		0.000266577	0.777605	-4.5501
0.9	253.2	0.20019	-4.45333	5.22535	0.9	3.14159		0.167267	0.046823	0.0131088	0.0036705	0.243912	0.0228747	0.0027014	0.000350909	4.80744e-05	4.26316	-4.61039	2.10864	-0.321414	0	2.22182	1.36289	1.49261	0	0.939959	0.655	-0.0588451	-0.0232738	-0.0410595	2.875		-0.0205437	-0.0289595	1.01684		3.79545e-22	3.77238e-22	40.5265	1.06103	1.31766		0.000346543	1.01087	-5.4642
0.9	300.8	0.22501	-4.9125	5.02569	0.9	3.14159		0.188005	0.0526282	0.0147341	0.00412558	0.28928	0.0309414	0.00413737	0.000606816	9.37313e-05	4.26316	-4.61039	2.10864	-0.321414	0	2.208	1.36289	1.57911	0	1.09912	0.655	-0.0699076	-0.0276491	-0.0487784	2.875		-0.0244679	-0.034438	1.19052		4.5171e-22	4.49123e-22	40.5265	1.06103	1.31766		0.000412475	1.20319	-6.11569
0.9	349.5	0.24569	-5.26	4.88053	0.9	3.14159		0.205284	0.0574651	0.0160883	0.00450475	0.33078	0.0391074	0.0057452	0.000923592	0.000156183	4.26316	-4.61039	2.10864	-0.321414	0	2.19648	1.36289	1.65717	0	1.24168	0.655	-0.0812258	-0.0321255	-0.0566757	2.875		-0.0280058	-0.0397797	1.34741		5.19298e-22	5.15238e-22	40.5265	1.06103	1.31766		0.000473909	1.38239	-6.64239
0.9	400.5	0.26359	-5.55583	4.76745	0.9	3.14159		0.22024	0.0616518	0.0172604	0.00483295	0.369732	0.0473985	0.00751074	0.00129971	0.00023634	4.26316	-4.61039	2.10864	-0.321414	0	2.18651	1.36289	1.72958	0	1.37312	0.655	-0.0930785	-0.0368134	-0.0649459	2.875		-0.0312682	-0.0451294	1.49334		5.84287e-22	5.77581e-22	40.5265	1.06103	1.31766		0.00053266	1.55377	-7.1096
0.9	452.8	0.27902	-5.7925	4.6779	0.9	3.14159		0.233132	0.0652607	0.0182708	0.00511586	0.40579	0.055575	0.00936534	0.00172048	0.00033183	4.26316	-4.61039	2.10864	-0.321414	0	2.17791	1.36289	1.79593	0	1.49292	0.655	-0.105233	-0.0416207	-0.073427	2.875		-0.0342298	-0.0504033	1.62759		6.45905e-22	6.3553e-22	40.5265	1.06103	1.31766		0.00058806	1.71537	-7.50787
0.9	501.4	0.29138	-5.96083	4.6108	0.9	3.14159		0.243459	0.0681517	0.0190801	0.00534248	0.436474	0.0628882	0.0111087	0.00213612	0.00043094	4.26316	-4.61039	2.10864	-0.321414	0	2.17103	1.36289	1.85191	0	1.59355	0.655	-0.116528	-0.046088	-0.0813081	2.875		-0.0367015	-0.0551493	1.74132		6.99494e-22	6.8501e-22	40.5265	1.06103	1.31766		0.000636002	1.85522	-7.81605
0.9	551.7	0.30263	-6.105	4.55294	0.9	3.14159		0.252859	0.070783	0.0198168	0.00554875	0.465896	0.0701908	0.0129213	0.00258613	0.000542673	4.26316	-4.61039	2.10864	-0.321414	0	2.16476	1.36289	1.90519	0	1.689	0.655	-0.128218	-0.0507115	-0.0894649	2.875		-0.039027	-0.0599329	1.85006		7.51913e-22	7.32596e-22	40.5265	1.06103	1.31766		0.000682685	1.99139	-8.09639
0.9	599.1	0.3121	-6.2225	4.50642	0.9	3.14159		0.260772	0.0729979	0.0204369	0.00572238	0.491836	0.0768533	0.0146327	0.00302575	0.000655614	4.26316	-4.61039	2.10864	-0.321414	0	2.15949	1.36289	1.95185	0	1.77233	0.655	-0.139234	-0.0550684	-0.0971514	2.875		-0.0410401	-0.0643422	1.94573		7.98974e-22	7.7466e-22	40.5265	1.06103	1.31766		0.000724425	2.11315	-8.33565
0.9	800	0.34392		4.36292	0.9	3.14159		0.287359	0.0804404	0.0225205	0.0063058	0.587679	0.103152	0.0218544	0.00501039	0.00120145	4.26316	-4.61039	2.10864	-0.321414	0	2.14176	1.36289	2.12197	0	2.07427	0.655	-0.185925	-0.0735349	-0.12973	2.875		-0.0481586	-0.0822499	2.29835		9.79936e-22	9.30919e-22	40.5265	1.06103	1.31766		0.000883492	2.57715
0.9	1000	0.36742		4.26784	0.9	3.14159		0.306994	0.0859369	0.0240594	0.00673668	0.668205	0.127097	0.0289772	0.00712996	0.00183241	4.26316	-4.61039	2.10864	-0.321414	0	2.12867	1.36289	2.26235	0	2.32151	0.655	-0.232406	-0.0919186	-0.162162	2.875		-0.0537464	-0.0992497	2.59435		1.14047e-21	1.06312e-21	40.5265	1.06103	1.31766		0.00102293	2.98388
0.9	1200	0.3862		4.19751	0.9	3.14159		0.322685	0.0903294	0.0252891	0.00708101	0.739438	0.149532	0.0360449	0.00935694	0.00253425	4.26316	-4.61039	2.10864	-0.321414	0	2.11821	1.36289	2.3848	0	2.53594	0.655	-0.278887	-0.110302	-0.194595	2.875		-0.0583943	-0.115731	2.85649		1.2887e-21	1.18068e-21	40.5265	1.06103	1.31766		0.0011505	3.35601
0.9	1400	0.40191		4.14209	0.9	3.14159		0.335812	0.0940038	0.0263178	0.00736906	0.804306	0.170896	0.0430816	0.011675	0.00329796	4.26316	-4.61039	2.10864	-0.321414	0	2.10946	1.36289	2.49502	0	2.72808	0.655	-0.325368	-0.128686	-0.227027	2.875		-0.062396	-0.131855	3.09562		1.42847e-21	1.28818e-21	40.5265	1.06103	1.31766		0.00126991	3.70434
0.9	1600	0.41547		4.09653	0.9	3.14159		0.347141	0.0971754	0.0272058	0.00761768	0.864569	0.191478	0.0501119	0.0140765	0.00411842	4.26316	-4.61039	2.10864	-0.321414	0	2.10191	1.36289	2.5964	0	2.90415	0.655	-0.371849	-0.14707	-0.259459	2.875		-0.0659282	-0.147719	3.31815		1.56209e-21	1.38835e-21	40.5265	1.06103	1.31766		0.0013834	4.03539
0.9	1800	0.42742		4.05799	0.9	3.14159		0.357126	0.0999704	0.0279883	0.00783678	0.921256	0.211442	0.0571434	0.0165533	0.00499087	4.26316	-4.61039	2.10864	-0.321414	0	2.09525	1.36289	2.69092	0	3.0678	0.655	-0.41833	-0.165453	-0.291892	2.875		-0.0690947	-0.163382	3.52784		1.69093e-21	1.48283e-21	40.5265	1.06103	1.31766		0.00149228	4.35297
0.9	2000	0.43813		4.02465	0.9	3.14159		0.366075	0.102475	0.0286896	0.00803315	0.975139	0.230929	0.064191	0.0191022	0.00591282	4.26316	-4.61039	2.10864	-0.321414	0	2.08928	1.36289	2.78006	0	3.22172	0.655	-0.464811	-0.183837	-0.324324	2.875		-0.0719735	-0.178886	3.72748		1.816e-21	1.57283e-21	40.5265	1.06103	1.31766		0.00159752	4.65996
0.9	2200	0.44786		3.99529	0.9	3.14159		0.374205	0.104751	0.0293267	0.00821155	1.0268	0.250052	0.0712703	0.021723	0.00688309	4.26316	-4.61039	2.10864	-0.321414	0	2.08386	1.36289	2.86491	0	3.36787	0.655	-0.511293	-0.202221	-0.356757	2.875		-0.0746232	-0.194264	3.9191		1.93807e-21	1.65925e-21	40.5265	1.06103	1.31766		0.00169987	4.95851
0.9	2400	0.45679		3.96908	0.9	3.14159		0.381666	0.10684	0.0299115	0.00837529	1.07663	0.268888	0.0783898	0.0244141	0.00790032	4.26316	-4.61039	2.10864	-0.321414	0	2.07889	1.36289	2.94622	0	3.50763	0.655	-0.557774	-0.220605	-0.389189	2.875		-0.0770836	-0.209536	4.10412		2.05767e-21	1.74273e-21	40.5265	1.06103	1.31766		0.00179983	5.25009
0.9	2600	0.46505		3.94545	0.9	3.14159		0.388567	0.108772	0.0304524	0.00852673	1.12492	0.287485	0.0855525	0.0271729	0.00896294	4.26316	-4.61039	2.10864	-0.321414	0	2.07429	1.36289	3.02453	0	3.64196	0.655	-0.604255	-0.238988	-0.421622	2.875		-0.0793831	-0.224721	4.28351		2.17516e-21	1.8237e-21	40.5265	1.06103	1.31766		0.00189776	5.53575
0.9	2800	0.47273		3.92396	0.9	3.14159		0.394984	0.110568	0.0309553	0.00866755	1.17181	0.305858	0.0927511	0.0299934	0.0100681	4.26316	-4.61039	2.10864	-0.321414	0	2.07001	1.36289	3.10013	0	3.77144	0.655	-0.650736	-0.257372	-0.454054	2.875		-0.0815378	-0.239825	4.4579		2.29075e-21	1.90242e-21	40.5265	1.06103	1.31766		0.00199386	5.81608
0.9	3000	0.47994		3.90421	0.9	3.14159		0.401009	0.112254	0.0314274	0.00879974	1.21769	0.324115	0.100018	0.0328859	0.0112194	4.26316	-4.61039	2.10864	-0.321414	0	2.06599	1.36289	3.17369	0	3.89722	0.655	-0.697217	-0.275756	-0.486486	2.875		-0.0835844	-0.254869	4.62847		2.40493e-21	1.97945e-21	40.5265	1.06103	1.31766		0.00208859	6.09243	-12.1339
0.8	5.6	0.0042404	0	19.3148	0.8	3.14159		0.00327527	0.000920164	0.000258572	7.26776e-05	0.00329684	5.41084e-06	1.18276e-08	2.90728e-11	7.60954e-14	4.2811	-4.60527	2.09808	-0.318246	0	2.33115	1.36289	1.00708	0	0.0140892	0.655	-0.00130147	-0.000514744	-0.000908108	2.875		-0.000240049	-0.000522153	0.0155487		5.58905e-24	5.00413e-24	40.5265	1.06103	1.31766		4.95929e-06	0.0144663	-0.0144663
0.8	15.9	0.012213	-0.16333	13.5754	0.8	3.14159		0.00943328	0.00265021	0.000744728	0.000209323	0.00961409	4.56327e-05	2.87883e-07	2.04062e-09	1.5419e-11	4.2811	-4.60527	2.09808	-0.318246	0	2.32704	1.36289	1.0206	0	0.0409494	0.655	-0.00369525	-0.00146151	-0.00257838	2.875		-0.000706964	-0.00149657	0.0451217		1.62013e-23	1.46039e-23	40.5265	1.06103	1.31766		1.44014e-05	0.042009	-0.205339
0.8	30.7	0.02406	-0.41917	10.8291	0.8	3.14159		0.0185839	0.005221	0.00146714	0.000412372	0.0192966	0.000181545	2.26322e-06	3.16625e-08	4.71904e-10	4.2811	-4.60527	2.09808	-0.318246	0	2.32094	1.36289	1.04122	0	0.0817794	0.655	-0.00713486	-0.0028219	-0.00497838	2.875		-0.00143876	-0.00293031	0.0899183		3.22471e-23	2.93463e-23	40.5265	1.06103	1.31766		2.87373e-05	0.0838267	-0.502997
0.8	45.6	0.036436	-0.68917	9.43008	0.8	3.14159		0.028143	0.00790658	0.0022218	0.000624488	0.0298047	0.000427378	8.09441e-06	1.71822e-07	3.88314e-09	4.2811	-4.60527	2.09808	-0.318246	0	2.31457	1.36289	1.06348	0	0.125646	0.655	-0.0105977	-0.00419149	-0.00739459	2.875		-0.00225237	-0.0044162	0.137864		4.94074e-23	4.53861e-23	40.5265	1.06103	1.31766		4.41404e-05	0.128757	-0.817927
0.8	60.5	0.049226	-0.96667	8.53023	0.8	3.14159		0.038022	0.010682	0.00300172	0.0008437	0.0411076	0.000801687	2.0582e-05	5.91448e-07	1.8083e-08	4.2811	-4.60527	2.09808	-0.318246	0	2.30799	1.36289	1.08727	0	0.172337	0.655	-0.0140605	-0.00556107	-0.00981081	2.875		-0.00314689	-0.00594676	0.188726		6.76269e-23	6.26866e-23	40.5265	1.06103	1.31766		6.05647e-05	0.176667	-1.14334
0.8	80.4	0.066843	-1.33833	7.70325	0.8	3.14159		0.0516293	0.0145049	0.00407597	0.00114564	0.0574575	0.00153564	5.37816e-05	2.10441e-06	8.75296e-08	4.2811	-4.60527	2.09808	-0.318246	0	2.29891	1.36289	1.12143	0	0.239022	0.655	-0.0186854	-0.00739025	-0.0130378	2.875		-0.00447035	-0.00806203	0.261126		9.36457e-23	8.77988e-23	40.5265	1.06103	1.31766		8.41258e-05	0.245395	-1.58373
0.8	102	0.086419	-1.7475	7.07114	0.8	3.14159		0.0667498	0.0187529	0.00526968	0.00148116	0.0767616	0.0026798	0.000121964	6.1892e-06	3.33519e-07	4.2811	-4.60527	2.09808	-0.318246	0	2.28883	1.36289	1.1614	0	0.316537	0.655	-0.0237054	-0.0093757	-0.0165405	2.875		-0.0060687	-0.0104474	0.345027		1.24006e-22	1.17578e-22	40.5265	1.06103	1.31766		0.000111742	0.325953	-2.07345
0.8	129.9	0.1118	-2.2575	6.48951	0.8	3.14159		0.086354	0.0242605	0.00681737	0.00191618	0.10373	0.00474806	0.000281444	1.85521e-05	1.29689e-06	4.2811	-4.60527	2.09808	-0.318246	0	2.27576	1.36289	1.21661	0	0.422799	0.655	-0.0301895	-0.0119402	-0.0210649	2.875		-0.00834905	-0.0136476	0.459779		1.66045e-22	1.59405e-22	40.5265	1.06103	1.31766		0.000150138	0.437952	-2.69545
0.8	162.5	0.14048	-2.80833	6.01387	0.8	3.14159		0.108506	0.0304841	0.00856623	0.00240773	0.137128	0.00800804	0.00060102	5.00125e-05	4.40682e-06	4.2811	-4.60527	2.09808	-0.318246	0	2.261	1.36289	1.28405	0	0.551425	0.655	-0.0377659	-0.0149368	-0.0263514	2.875		-0.0112228	-0.0175025	0.59856		2.17906e-22	2.11539e-22	40.5265	1.06103	1.31766		0.000197643	0.576525	-3.38486
0.8	201.6	0.17191	-3.37417	5.62245	0.8	3.14159		0.132783	0.0373043	0.0104828	0.00294642	0.177754	0.0129184	0.00119652	0.000122471	1.32521e-05	4.2811	-4.60527	2.09808	-0.318246	0	2.24481	1.36289	1.36482	0	0.703961	0.655	-0.046853	-0.0185308	-0.0326919	2.875		-0.0147558	-0.0221736	0.763374		2.81236e-22	2.7541e-22	40.5265	1.06103	1.31766		0.000255708	0.7459	-4.12007
0.8	252.1	0.20643	-3.9625	5.28975	0.8	3.14159		0.159446	0.0447952	0.0125877	0.00353807	0.227949	0.0202666	0.00227521	0.000281251	3.66872e-05	4.2811	-4.60527	2.09808	-0.318246	0	2.22704	1.36289	1.4629	0	0.887226	0.655	-0.0585895	-0.0231727	-0.0408811	2.875		-0.0191282	-0.0281013	0.962281		3.60535e-22	3.54934e-22	40.5265	1.06103	1.31766		0.000328297	0.957641	-4.92014
0.8	300.9	0.23367	-4.4	5.07565	0.8	3.14159		0.180486	0.0507062	0.0142488	0.00400495	0.2723	0.0278125	0.00356074	0.000500532	7.41383e-05	4.2811	-4.60527	2.09808	-0.318246	0	2.21301	1.36289	1.54813	0	1.04497	0.655	-0.0699309	-0.0276583	-0.0487946	2.875		-0.0229626	-0.0336138	1.1347		4.3205e-22	4.25692e-22	40.5265	1.06103	1.31766		0.000393509	1.14787	-5.54787
0.8	350.6	0.25649	-4.74	4.92042	0.8	3.14159		0.198112	0.0556581	0.0156403	0.00439606	0.313121	0.0355451	0.00502655	0.000778597	0.000126925	4.2811	-4.60527	2.09808	-0.318246	0	2.20126	1.36289	1.62552	0	1.18711	0.655	-0.0814814	-0.0322267	-0.0568541	2.875		-0.0264464	-0.0389952	1.29131		4.99367e-22	4.9119e-22	40.5265	1.06103	1.31766		0.000454605	1.32608	-6.06608
0.8	403.1	0.27651	-5.0175	4.79868	0.8	3.14159		0.213575	0.0600025	0.0168611	0.00473919	0.352009	0.0435539	0.00667669	0.00111875	0.000197076	4.2811	-4.60527	2.09808	-0.318246	0	2.19095	1.36289	1.69838	0	1.32006	0.655	-0.0936827	-0.0370524	-0.0653676	2.875		-0.0297101	-0.0444499	1.43909		5.65028e-22	5.53892e-22	40.5265	1.06103	1.31766		0.000513889	1.49901	-6.51651
0.8	449.9	0.29171	-5.215	4.71384	0.8	3.14159		0.225316	0.0633009	0.017788	0.00499971	0.383643	0.0504977	0.00820125	0.00145356	0.000270621	4.2811	-4.60527	2.09808	-0.318246	0	2.18312	1.36289	1.75706	0	1.4266	0.655	-0.104559	-0.0413542	-0.0729568	2.875		-0.032319	-0.0491464	1.5585		6.19626e-22	6.05103e-22	40.5265	1.06103	1.31766		0.000562942	1.6421	-6.8571
0.8	502	0.3064	-5.39333	4.63727	0.8	3.14159		0.236662	0.0664886	0.0186837	0.00525149	0.416093	0.0579951	0.00993382	0.00185402	0.000363201	4.2811	-4.60527	2.09808	-0.318246	0	2.17556	1.36289	1.81675	0	1.5345	0.655	-0.116668	-0.0461431	-0.0814054	2.875		-0.0349475	-0.0542225	1.68043		6.76797e-22	6.57816e-22	40.5265	1.06103	1.31766		0.000614069	1.79124	-7.18457
0.8	551.2	0.31858	-5.52833	4.57741	0.8	3.14159		0.24607	0.0691316	0.0194265	0.00546025	0.444499	0.0648525	0.0115894	0.0022538	0.000459746	4.2811	-4.60527	2.09808	-0.318246	0	2.16929	1.36289	1.86859	0	1.62788	0.655	-0.128102	-0.0506655	-0.0893838	2.875		-0.0372058	-0.0588924	1.78679		7.27855e-22	7.04107e-22	40.5265	1.06103	1.31766		0.000659525	1.92383	-7.45216
0.8	600	0.32938	-5.63917	4.52682	0.8	3.14159		0.254412	0.0714752	0.020085	0.00564535	0.4709	0.07146	0.0132433	0.00266778	0.000563383	4.2811	-4.60527	2.09808	-0.318246	0	2.16373	1.36289	1.91646	0	1.71382	0.655	-0.139443	-0.0551512	-0.0972973	2.875		-0.0392676	-0.063426	1.88541		7.76166e-22	7.47247e-22	40.5265	1.06103	1.31766		0.000702362	2.04879	-7.68796
0.8	800	0.36451		4.37646	0.8	3.14159		0.281546	0.0790984	0.0222272	0.00624745	0.565507	0.0968443	0.0200601	0.00449993	0.00105623	4.2811	-4.60527	2.09808	-0.318246	0	2.14564	1.36289	2.08566	0	2.01565	0.655	-0.185925	-0.0735349	-0.12973	2.875		-0.0463471	-0.0812496	2.2377		9.56224e-22	9.02694e-22	40.5265	1.06103	1.31766		0.000860627	2.51045
0.8	1000	0.39057		4.27687	0.8	3.14159		0.301675	0.0847534	0.0238163	0.00669411	0.645494	0.120185	0.0268735	0.00648967	0.00163753	4.2811	-4.60527	2.09808	-0.318246	0	2.13222	1.36289	2.22613	0	2.26426	0.655	-0.232406	-0.0919186	-0.162162	2.875		-0.0519458	-0.0982555	2.53508		1.1169e-21	1.03507e-21	40.5265	1.06103	1.31766		0.0010002	2.91758
0.8	1200	0.41137		4.20354	0.8	3.14159		0.317741	0.089267	0.0250846	0.0070506	0.716283	0.142117	0.0336705	0.00859656	0.00229075	4.2811	-4.60527	2.09808	-0.318246	0	2.12151	1.36289	2.3487	0	2.4799	0.655	-0.278887	-0.110302	-0.194595	2.875		-0.0566082	-0.114744	2.79845		1.26532e-21	1.15285e-21	40.5265	1.06103	1.31766		0.00112795	3.29024
0.8	1400	0.42876		4.14592	0.8	3.14159		0.331173	0.0930406	0.026145	0.00734866	0.7808	0.163056	0.040467	0.010803	0.00300713	4.2811	-4.60527	2.09808	-0.318246	0	2.11255	1.36289	2.45909	0	2.67323	0.655	-0.325368	-0.128686	-0.227027	2.875		-0.060629	-0.130879	3.03879		1.40534e-21	1.26064e-21	40.5265	1.06103	1.31766		0.00124761	3.63928
0.8	1600	0.44374		4.09873	0.8	3.14159		0.342743	0.0962913	0.0270585	0.0076054	0.840682	0.183238	0.0472695	0.013096	0.00378018	4.2811	-4.60527	2.09808	-0.318246	0	2.10484	1.36289	2.56053	0	2.85019	0.655	-0.371849	-0.14707	-0.259459	2.875		-0.0641743	-0.146751	3.26222		1.53913e-21	1.36103e-21	40.5265	1.06103	1.31766		0.00136126	3.97081
0.8	1800	0.45693		4.05891	0.8	3.14159		0.352931	0.0991535	0.0278628	0.00783147	0.897013	0.202835	0.0540876	0.0154683	0.00460565	4.2811	-4.60527	2.09808	-0.318246	0	2.09805	1.36289	2.6551	0	3.01465	0.655	-0.41833	-0.165453	-0.291892	2.875		-0.0673539	-0.162421	3.47274		1.66814e-21	1.45571e-21	40.5265	1.06103	1.31766		0.0014703	4.28887
0.8	2000	0.46876		4.02447	0.8	3.14159		0.362069	0.101721	0.0285842	0.00803423	0.950643	0.22201	0.0609439	0.01792	0.00548237	4.2811	-4.60527	2.09808	-0.318246	0	2.09195	1.36289	2.74442	0	3.16955	0.655	-0.464811	-0.183837	-0.324324	2.875		-0.0702538	-0.177937	3.67338		1.79349e-21	1.54603e-21	40.5265	1.06103	1.31766		0.00157581	4.59664
0.8	2200	0.47948		3.99425	0.8	3.14159		0.370349	0.104047	0.0292379	0.00821796	1.00197	0.240807	0.0678284	0.0204416	0.00640603	4.2811	-4.60527	2.09808	-0.318246	0	2.08643	1.36289	2.82927	0	3.31634	0.655	-0.511293	-0.202221	-0.356757	2.875		-0.0729146	-0.19332	3.86565		1.91571e-21	1.63263e-21	40.5265	1.06103	1.31766		0.0016783	4.8956
0.8	2400	0.48932		3.9673	0.8	3.14159		0.377949	0.106182	0.0298379	0.00838661	1.05151	0.259346	0.0747655	0.0230375	0.00737747	4.2811	-4.60527	2.09808	-0.318246	0	2.08137	1.36289	2.91064	0	3.45681	0.655	-0.557774	-0.220605	-0.389189	2.875		-0.0753897	-0.208601	4.05139		2.03549e-21	1.71634e-21	40.5265	1.06103	1.31766		0.00177844	5.18772
0.8	2600	0.49841		3.94303	0.8	3.14159		0.38497	0.108155	0.0303922	0.00854241	1.09948	0.277646	0.081747	0.025701	0.00839364	4.2811	-4.60527	2.09808	-0.318246	0	2.07669	1.36289	2.98894	0	3.5917	0.655	-0.604255	-0.238988	-0.421622	2.875		-0.0777	-0.223791	4.23136		2.15313e-21	1.79748e-21	40.5265	1.06103	1.31766		0.00187651	5.47378
0.8	2800	0.50687		3.92097	0.8	3.14159		0.391505	0.10999	0.0309081	0.00868741	1.14614	0.295761	0.0887806	0.028432	0.00945406	4.2811	-4.60527	2.09808	-0.318246	0	2.07233	1.36289	3.06465	0	3.7219	0.655	-0.650736	-0.257372	-0.454054	2.875		-0.0798723	-0.238905	4.4065		2.26895e-21	1.87647e-21	40.5265	1.06103	1.31766		0.00197283	5.75475
0.8	3000	0.51479		3.90076	0.8	3.14159		0.397622	0.111709	0.031391	0.00882315	1.19167	0.313728	0.0958701	0.0312296	0.010558	4.2811	-4.60527	2.09808	-0.318246	0	2.06825	1.36289	3.13814	0	3.84808	0.655	-0.697217	-0.275756	-0.486486	2.875		-0.0819257	-0.253953	4.57747		2.38322e-21	1.9536e-21	40.5265	1.06103	1.31766		0.00206766	6.03135	-11.3936
0.7	5.7	0.0045922	0	19.2087	0.7	3.14159		0.00329254	0.000928425	0.000261875	7.38884e-05	0.00331434	5.46831e-06	1.20163e-08	2.96927e-11	7.83592e-14	4.29946	-4.59985	2.08723	-0.315013	0	2.33114	1.36289	1.00713	0	0.0142248	0.655	-0.00132471	-0.000523936	-0.000924324	2.875		-0.000242523	-0.000530476	0.0157082		5.66513e-24	5.06526e-24	40.5265	1.06103	1.31766		5.02498e-06	0.0146579	-0.0146579
0.7	16	0.01305	-0.15333	13.5613	0.7	3.14159		0.00935667	0.00263838	0.000744191	0.000209974	0.00953453	4.48853e-05	2.8086e-07	1.97464e-09	1.47995e-11	4.29946	-4.59985	2.08723	-0.315013	0	2.3271	1.36289	1.02047	0	0.0407874	0.655	-0.00371849	-0.0014707	-0.00259459	2.875		-0.000704206	-0.001502	0.0449779		1.62089e-23	1.45835e-23	40.5265	1.06103	1.31766		1.44011e-05	0.0420079	-0.195338
0.7	31.2	0.025898	-0.40083	10.7915	0.7	3.14159		0.0185685	0.00523591	0.00147686	0.000416698	0.01928	0.000181237	2.25751e-06	3.15564e-08	4.69933e-10	4.29946	-4.59985	2.08723	-0.315013	0	2.32095	1.36289	1.04127	0	0.0820647	0.655	-0.00725106	-0.00286786	-0.00505946	2.875		-0.00144317	-0.00296754	0.0903148		3.25234e-23	2.9528e-23	40.5265	1.06103	1.31766		2.89653e-05	0.0844918	-0.485322
0.7	45.1	0.038005	-0.62917	9.49638	0.7	3.14159		0.0272491	0.00768364	0.00216728	0.0006115	0.0288044	0.000399673	7.32703e-06	1.50565e-07	3.29424e-09	4.29946	-4.59985	2.08723	-0.315013	0	2.31517	1.36289	1.06149	0	0.12202	0.655	-0.0104815	-0.00414553	-0.00731351	2.875		-0.00218165	-0.00434236	0.134053		4.82632e-23	4.41714e-23	40.5265	1.06103	1.31766		4.30754e-05	0.125651	-0.754821
0.7	60.2	0.051499	-0.885	8.58168	0.7	3.14159		0.0369241	0.0104118	0.00293679	0.000828618	0.0398284	0.000753753	1.87856e-05	5.24121e-07	1.55594e-08	4.29946	-4.59985	2.08723	-0.315013	0	2.30872	1.36289	1.08476	0	0.167813	0.655	-0.0139908	-0.0055335	-0.00976216	2.875		-0.00305373	-0.00587444	0.184034		6.62764e-23	6.11674e-23	40.5265	1.06103	1.31766		5.92854e-05	0.172936	-1.05794
0.7	80.4	0.069987	-1.22917	7.74758	0.7	3.14159		0.0501797	0.0141496	0.00399109	0.00112609	0.055671	0.00144469	4.91517e-05	1.8687e-06	7.5528e-08	4.29946	-4.59985	2.08723	-0.315013	0	2.29988	1.36289	1.11796	0	0.232812	0.655	-0.0186854	-0.00739025	-0.0130378	2.875		-0.00433432	-0.00798691	0.254763		9.18651e-23	8.56793e-23	40.5265	1.06103	1.31766		8.24088e-05	0.240386	-1.46956
0.7	101	0.089138	-1.57667	7.14744	0.7	3.14159		0.0639107	0.0180214	0.00508319	0.00143423	0.0730416	0.00243676	0.000106083	5.15132e-06	2.65679e-07	4.29946	-4.59985	2.08723	-0.315013	0	2.29073	1.36289	1.15405	0	0.30305	0.655	-0.023473	-0.00928378	-0.0163784	2.875		-0.00576825	-0.0102119	0.33099		1.19636e-22	1.12671e-22	40.5265	1.06103	1.31766		0.000107606	0.313886	-1.89056
0.7	130.3	0.11632	-2.0475	6.54064	0.7	3.14159		0.0833998	0.0235169	0.00663328	0.00187159	0.0995182	0.00439052	0.000251093	1.59753e-05	1.07811e-06	4.29946	-4.59985	2.08723	-0.315013	0	2.27773	1.36289	1.20847	0	0.408197	0.655	-0.0302825	-0.011977	-0.0211297	2.875		-0.00799848	-0.0134818	0.444868		1.61631e-22	1.54033e-22	40.5265	1.06103	1.31766		0.000145851	0.425447	-2.47295
0.7	161.2	0.14401	-2.51333	6.09127	0.7	3.14159		0.103253	0.0291151	0.00821233	0.00231712	0.128908	0.00713767	0.000508838	4.02474e-05	3.37215e-06	4.29946	-4.59985	2.08723	-0.315013	0	2.2645	1.36289	1.26812	0	0.522453	0.655	-0.0374638	-0.0148173	-0.0261405	2.875		-0.0105164	-0.017022	0.568518		2.08092e-22	2.00238e-22	40.5265	1.06103	1.31766		0.000188279	0.549209	-3.06254
0.7	200.5	0.17648	-3.02833	5.69211	0.7	3.14159		0.126534	0.0356797	0.010064	0.00283956	0.166863	0.0115061	0.00101335	9.87093e-05	1.01691e-05	4.29946	-4.59985	2.08723	-0.315013	0	2.24898	1.36289	1.34405	0	0.666577	0.655	-0.0465973	-0.0184297	-0.0325135	2.875		-0.0138032	-0.0215711	0.724685		2.68287e-22	2.6032e-22	40.5265	1.06103	1.31766		0.000243306	0.709723	-3.73805
0.7	251.2	0.21267	-3.56333	5.34896	0.7	3.14159		0.152481	0.0429964	0.0121277	0.00342186	0.214226	0.018126	0.00194125	0.000229142	2.8555e-05	4.29946	-4.59985	2.08723	-0.315013	0	2.23168	1.36289	1.43725	0	0.841658	0.655	-0.0583803	-0.02309	-0.0407351	2.875		-0.017918	-0.0273705	0.915161		3.44301e-22	3.35875e-22	40.5265	1.06103	1.31766		0.000312711	0.912177	-4.47551
0.7	300.2	0.24172	-3.9675	5.12548	0.7	3.14159		0.17331	0.0488696	0.0137843	0.00388927	0.256665	0.0250464	0.00307129	0.000413915	5.88079e-05	4.29946	-4.59985	2.08723	-0.315013	0	2.21779	1.36289	1.51943	0	0.994589	0.655	-0.0697682	-0.027594	-0.0486811	2.875		-0.0215842	-0.0328039	1.08262		4.13701e-22	4.04058e-22	40.5265	1.06103	1.31766		0.000375869	1.09641	-5.06391
0.7	355.4	0.26873	-4.31417	4.94766	0.7	3.14159		0.192676	0.0543303	0.0153246	0.00432386	0.300149	0.0330104	0.00453122	0.000681793	0.000108005	4.29946	-4.59985	2.08723	-0.315013	0	2.20488	1.36289	1.60246	0	1.14788	0.655	-0.082597	-0.0326679	-0.0576324	2.875		-0.0252958	-0.0386938	1.25181		4.86404e-22	4.74346e-22	40.5265	1.06103	1.31766		0.000441736	1.28854	-5.60271
0.7	405.6	0.28923	-4.55833	4.82789	0.7	3.14159		0.207374	0.0584749	0.0164937	0.0046537	0.336048	0.0401943	0.00596947	0.000969867	0.000165731	4.29946	-4.59985	2.08723	-0.315013	0	2.19508	1.36289	1.67018	0	1.27209	0.655	-0.0942638	-0.0372822	-0.065773	2.875		-0.028312	-0.0438518	1.39008		5.47819e-22	5.32672e-22	40.5265	1.06103	1.31766		0.000497102	1.45005	-6.00838
0.7	450.9	0.30519	-4.7375	4.74222	0.7	3.14159		0.218817	0.0617016	0.0174038	0.0049105	0.365897	0.0465567	0.00732594	0.00125914	0.000227434	4.29946	-4.59985	2.08723	-0.315013	0	2.18746	1.36289	1.72596	0	1.3739	0.655	-0.104792	-0.0414461	-0.0731189	2.875		-0.0307806	-0.0483665	1.50428		5.99927e-22	5.8136e-22	40.5265	1.06103	1.31766		0.000543869	1.58647	-6.32397
0.7	501.4	0.32077	-4.8925	4.66416	0.7	3.14159		0.229988	0.0648515	0.0182923	0.00516118	0.396772	0.0534868	0.00888176	0.0016085	0.000305897	4.29946	-4.59985	2.08723	-0.315013	0	2.18001	1.36289	1.78319	0	1.47791	0.655	-0.116528	-0.046088	-0.0813081	2.875		-0.0332925	-0.0532669	1.62184		6.54871e-22	6.31895e-22	40.5265	1.06103	1.31766		0.000592972	1.7297	-6.6222
0.7	552.5	0.33465	-5.02583	4.59877	0.7	3.14159		0.239939	0.0676577	0.0190838	0.00538451	0.425828	0.0603151	0.0104867	0.00198578	0.000394601	4.29946	-4.59985	2.08723	-0.315013	0	2.17337	1.36289	1.83662	0	1.57465	0.655	-0.128404	-0.050785	-0.0895946	2.875		-0.0356144	-0.0581041	1.73205		7.07593e-22	6.79606e-22	40.5265	1.06103	1.31766		0.000639886	1.86655	-6.89238
0.7	599.9	0.34617	-5.12083	4.54718	0.7	3.14159		0.248199	0.0699867	0.0197407	0.00556987	0.451125	0.0664902	0.0119942	0.00235382	0.000484467	4.29946	-4.59985	2.08723	-0.315013	0	2.16787	1.36289	1.88284	0	1.65804	0.655	-0.13942	-0.055142	-0.0972811	2.875		-0.0376013	-0.062499	1.82775		7.54312e-22	7.21263e-22	40.5265	1.06103	1.31766		0.000681296	1.98734	-7.10817
0.7	800	0.3849		4.38924	0.7	3.14159		0.275968	0.0778169	0.0219493	0.00619303	0.544891	0.0910971	0.0184579	0.00405325	0.000931694	4.29946	-4.59985	2.08723	-0.315013	0	2.14935	1.36289	2.05178	0	1.96095	0.655	-0.185925	-0.0735349	-0.12973	2.875		-0.0446684	-0.0803226	2.18111		9.34251e-22	8.76539e-22	40.5265	1.06103	1.31766		0.000839438	2.44864
0.7	1000	0.41363		4.28517	0.7	3.14159		0.296567	0.0836254	0.0235877	0.0066553	0.624325	0.113852	0.0249792	0.00592301	0.001468	4.29946	-4.59985	2.08723	-0.315013	0	2.13562	1.36289	2.19229	0	2.21083	0.655	-0.232406	-0.0919186	-0.162162	2.875		-0.0502764	-0.0973336	2.47977		1.09505e-21	1.00906e-21	40.5265	1.06103	1.31766		0.000979128	2.85612
0.7	1200	0.43656		4.20879	0.7	3.14159		0.313007	0.0882612	0.0248953	0.00702424	0.694737	0.135322	0.0315273	0.00792059	0.00207754	4.29946	-4.59985	2.08723	-0.315013	0	2.12466	1.36289	2.31506	0	2.42784	0.655	-0.278887	-0.110302	-0.194595	2.875		-0.0549597	-0.113834	2.74453		1.24374e-21	1.12717e-21	40.5265	1.06103	1.31766		0.00110715	3.22955
0.7	1400	0.4557		4.14902	0.7	3.14159		0.326731	0.0921309	0.0259868	0.0073322	0.758891	0.155849	0.0380962	0.010023	0.00275055	4.29946	-4.59985	2.08723	-0.315013	0	2.11551	1.36289	2.42559	0	2.6223	0.655	-0.325368	-0.128686	-0.227027	2.875		-0.0589989	-0.129979	2.98602		1.384e-21	1.23525e-21	40.5265	1.06103	1.31766		0.00122703	3.57926
0.7	1600	0.47217		4.10021	0.7	3.14159		0.338539	0.0954607	0.026926	0.0075972	0.818439	0.175661	0.0446883	0.0122167	0.00348063	4.29946	-4.59985	2.08723	-0.315013	0	2.10764	1.36289	2.52714	0	2.80026	0.655	-0.371849	-0.14707	-0.259459	2.875		-0.0625619	-0.145861	3.21047		1.51803e-21	1.3359e-21	40.5265	1.06103	1.31766		0.00134091	3.91144
0.7	1800	0.48668		4.05905	0.7	3.14159		0.348943	0.0983942	0.0277535	0.00783067	0.87454	0.194948	0.0513197	0.0144969	0.00426473	4.29946	-4.59985	2.08723	-0.315013	0	2.1007	1.36289	2.62195	0	2.96586	0.655	-0.41833	-0.165453	-0.291892	2.875		-0.0657671	-0.161545	3.42217		1.64737e-21	1.43098e-21	40.5265	1.06103	1.31766		0.00145027	4.23045
0.7	2000	0.49966		4.02359	0.7	3.14159		0.358249	0.101018	0.0284937	0.00803952	0.927854	0.213802	0.0579876	0.0168552	0.00509888	4.29946	-4.59985	2.08723	-0.315013	0	2.0945	1.36289	2.71133	0	3.12153	0.655	-0.464811	-0.183837	-0.324324	2.875		-0.0686822	-0.177069	3.6236		1.77292e-21	1.52155e-21	40.5265	1.06103	1.31766		0.00155597	4.53877
0.7	2200	0.51144		3.99246	0.7	3.14159		0.366695	0.1034	0.0291654	0.00822906	0.97899	0.232339	0.0647078	0.0192916	0.0059822	4.29946	-4.59985	2.08723	-0.315013	0	2.08887	1.36289	2.79642	0	3.26938	0.655	-0.511293	-0.202221	-0.356757	2.875		-0.0713691	-0.192467	3.81695		1.89548e-21	1.60855e-21	40.5265	1.06103	1.31766		0.00165879	4.83869
0.7	2400	0.52222		3.96479	0.7	3.14159		0.374424	0.10558	0.0297802	0.00840251	1.02824	0.250589	0.0714714	0.0217983	0.00691126	4.29946	-4.59985	2.08723	-0.315013	0	2.08372	1.36289	2.87782	0	3.41049	0.655	-0.557774	-0.220605	-0.389189	2.875		-0.0738578	-0.207755	4.00335		2.01544e-21	1.69247e-21	40.5265	1.06103	1.31766		0.00175911	5.13132
0.7	2600	0.53219		3.93988	0.7	3.14159		0.381573	0.107595	0.0303487	0.00856292	1.076	0.268645	0.078297	0.0243787	0.00788681	4.29946	-4.59985	2.08723	-0.315013	0	2.07895	1.36289	2.95628	0	3.54622	0.655	-0.604255	-0.238988	-0.421622	2.875		-0.0761897	-0.222957	4.18419		2.13335e-21	1.77395e-21	40.5265	1.06103	1.31766		0.00185745	5.41817
0.7	2800	0.54146		3.91727	0.7	3.14159		0.388219	0.109469	0.0308773	0.00871208	1.12243	0.286518	0.0851771	0.0270271	0.00890631	4.29946	-4.59985	2.08723	-0.315013	0	2.07452	1.36289	3.0321	0	3.67718	0.655	-0.650736	-0.257372	-0.454054	2.875		-0.0783809	-0.238081	4.36009		2.24943e-21	1.85323e-21	40.5265	1.06103	1.31766		0.00195401	5.69984
0.7	3000	0.55014		3.89655	0.7	3.14159		0.394443	0.111224	0.0313723	0.00885174	1.16778	0.304265	0.0921223	0.0297453	0.00997013	4.29946	-4.59985	2.08723	-0.315013	0	2.07037	1.36289	3.10575	0	3.80415	0.655	-0.697217	-0.275756	-0.486486	2.875		-0.0804561	-0.253142	4.53188		2.36398e-21	1.9307e-21	40.5265	1.06103	1.31766		0.00204911	5.97724	-10.6411
0.6	5.6	0.0047814	0	19.3311	0.6	3.14159		0.00319383	0.000903972	0.000255948	7.24942e-05	0.00321434	5.14396e-06	1.09643e-08	2.62803e-11	6.71616e-14	4.31823	-4.59414	2.07609	-0.311714	0	2.3312	1.36289	1.00693	0	0.0138566	0.655	-0.00130147	-0.000514744	-0.000908108	2.875		-0.000236357	-0.000520115	0.0153119		5.54073e-24	4.94662e-24	40.5265	1.06103	1.31766		4.9127e-06	0.0143303	-0.0143303
0.6	15.4	0.013281	-0.13917	13.7519	0.6	3.14159		0.00887129	0.00251091	0.000710931	0.000201363	0.00903105	4.02965e-05	2.39028e-07	1.5932e-09	1.13203e-11	4.31823	-4.59414	2.07609	-0.311714	0	2.32742	1.36289	1.01943	0	0.0388136	0.655	-0.00357905	-0.00141555	-0.0024973	2.875		-0.000669658	-0.00144118	0.0428377		1.54945e-23	1.39098e-23	40.5265	1.06103	1.31766		1.37583e-05	0.0401329	-0.179303
0.6	31.1	0.02723	-0.36417	10.8249	0.6	3.14159		0.0181888	0.00514811	0.00145762	0.000412853	0.0188711	0.000173721	2.11937e-06	2.90174e-08	4.23264e-10	4.31823	-4.59414	2.07609	-0.311714	0	2.32121	1.36289	1.04048	0	0.080696	0.655	-0.00722782	-0.00285867	-0.00504324	2.875		-0.0014176	-0.00294646	0.0888961		3.21449e-23	2.9107e-23	40.5265	1.06103	1.31766		2.86081e-05	0.0834497	-0.44762
0.6	45.6	0.040444	-0.58	9.4876	0.6	3.14159		0.0270153	0.00764635	0.00216496	0.0006132	0.0285435	0.000392594	7.13496e-06	1.45353e-07	3.15284e-09	4.31823	-4.59414	2.07609	-0.311714	0	2.31532	1.36289	1.06106	0	0.121469	0.655	-0.0105977	-0.00419149	-0.00739459	2.875		-0.00216902	-0.00437017	0.133593		4.83164e-23	4.40874e-23	40.5265	1.06103	1.31766		4.30882e-05	0.125688	-0.705688
0.6	61	0.054768	-0.81333	8.57561	0.6	3.14159		0.0365833	0.0103544	0.00293173	0.000830376	0.0394326	0.000739206	1.8251e-05	5.0447e-07	1.48372e-08	4.31823	-4.59414	2.07609	-0.311714	0	2.30894	1.36289	1.0841	0	0.166921	0.655	-0.0141767	-0.00560703	-0.00989189	2.875		-0.00303154	-0.00591784	0.183287		6.63354e-23	6.10021e-23	40.5265	1.06103	1.31766		5.92809e-05	0.172922	-0.986252
0.6	81.5	0.074166	-1.12417	7.75126	0.6	3.14159		0.0495406	0.0140218	0.0039701	0.00112448	0.0548868	0.00140559	4.72021e-05	1.77148e-06	7.06808e-08	4.31823	-4.59414	2.07609	-0.311714	0	2.30031	1.36289	1.11656	0	0.230654	0.655	-0.0189411	-0.00749137	-0.0132162	2.875		-0.00428099	-0.00803399	0.252779		9.16477e-23	8.50966e-23	40.5265	1.06103	1.31766		8.21146e-05	0.239528	-1.3637
0.6	102.7	0.094397	-1.43833	7.15245	0.6	3.14159		0.0630543	0.0178467	0.00505306	0.00143122	0.0719282	0.00236608	0.000101596	4.86647e-06	2.47595e-07	4.31823	-4.59414	2.07609	-0.311714	0	2.2913	1.36289	1.15207	0	0.299942	0.655	-0.0238681	-0.00944004	-0.0166541	2.875		-0.00568665	-0.0102851	0.328151		1.19311e-22	1.11783e-22	40.5265	1.06103	1.31766		0.000107161	0.312589	-1.75092
0.6	130.1	0.12033	-1.83	6.59654	0.6	3.14159		0.0803767	0.0227496	0.00644126	0.00182441	0.0952634	0.00404209	0.000222556	1.36379e-05	8.86625e-07	4.31823	-4.59414	2.07609	-0.311714	0	2.27975	1.36289	1.20021	0	0.393257	0.655	-0.030236	-0.0119586	-0.0210973	2.875		-0.00764724	-0.013274	0.429491		1.56946e-22	1.48515e-22	40.5265	1.06103	1.31766		0.000141348	0.412313	-2.24231
0.6	160	0.14767	-2.22667	6.16136	0.6	3.14159		0.098639	0.0279185	0.00790476	0.00223893	0.121846	0.00642468	0.000436846	3.29769e-05	2.63779e-06	4.31823	-4.59414	2.07609	-0.311714	0	2.26757	1.36289	1.25442	0	0.49754	0.655	-0.0371849	-0.014707	-0.0259459	2.875		-0.0099157	-0.0166068	0.542674		1.99704e-22	1.90608e-22	40.5265	1.06103	1.31766		0.000180283	0.525885	-2.75256
0.6	200.6	0.18206	-2.69167	5.74605	0.6	3.14159		0.12161	0.0344203	0.00974566	0.00276034	0.158499	0.0104684	0.000884565	8.27255e-05	8.18499e-06	4.31823	-4.59414	2.07609	-0.311714	0	2.25226	1.36289	1.32816	0	0.638154	0.655	-0.0466206	-0.0184389	-0.0325297	2.875		-0.0130782	-0.0211777	0.695468		2.5884e-22	2.49046e-22	40.5265	1.06103	1.31766		0.000234188	0.683128	-3.3748
0.6	252.9	0.22062	-3.1825	5.38963	0.6	3.14159		0.147367	0.0417104	0.0118098	0.00334498	0.204432	0.0166575	0.00172106	0.000196122	2.36027e-05	4.31823	-4.59414	2.07609	-0.311714	0	2.23509	1.36289	1.41908	0	0.80977	0.655	-0.0587754	-0.0232462	-0.0410108	2.875		-0.0170579	-0.0270138	0.882668		3.33786e-22	3.22859e-22	40.5265	1.06103	1.31766		0.000302441	0.88222	-4.06472
0.6	300.4	0.25013	-3.53167	5.16875	0.6	3.14159		0.167079	0.0472896	0.0133894	0.0037924	0.243523	0.0228095	0.0026905	0.000349088	4.77699e-05	4.31823	-4.59414	2.07609	-0.311714	0	2.22195	1.36289	1.49527	0	0.952274	0.655	-0.0698147	-0.0276123	-0.0487135	2.875		-0.0204305	-0.0321808	1.03905		3.98687e-22	3.86127e-22	40.5265	1.06103	1.31766		0.000361375	1.05413	-4.5858
0.6	351.5	0.27692	-3.82333	4.99639	0.6	3.14159		0.184974	0.0523545	0.0148235	0.00419858	0.28236	0.0296509	0.00389669	0.00056193	8.53598e-05	4.31823	-4.59414	2.07609	-0.311714	0	2.21002	1.36289	1.56999	0	1.09099	0.655	-0.0816906	-0.0323094	-0.057	2.875		-0.0237482	-0.0375679	1.19235		4.64442e-22	4.49353e-22	40.5265	1.06103	1.31766		0.000420857	1.22764	-5.05097
0.6	400.4	0.2987	-4.05083	4.87187	0.6	3.14159		0.199522	0.0564722	0.0159894	0.0045288	0.316543	0.0362256	0.00516185	0.000805497	0.000132273	4.31823	-4.59414	2.07609	-0.311714	0	2.20032	1.36289	1.63501	0	1.21095	0.655	-0.0930553	-0.0368042	-0.0649297	2.875		-0.0266294	-0.0425609	1.32594		5.23523e-22	5.05283e-22	40.5265	1.06103	1.31766		0.000474073	1.38287	-5.4337
0.6	450	0.31778	-4.2275	4.77235	0.6	3.14159		0.212267	0.0600795	0.0170107	0.00481809	0.3486	0.0428281	0.00652214	0.00108584	0.00019007	4.31823	-4.59414	2.07609	-0.311714	0	2.19182	1.36289	1.6954	0	1.32178	0.655	-0.104583	-0.0413634	-0.072973	2.875		-0.0292913	-0.0474815	1.4503		5.80039e-22	5.57952e-22	40.5265	1.06103	1.31766		0.00052476	1.53073	-5.75823
0.6	502.1	0.33524	-4.3775	4.68801	0.6	3.14159		0.22393	0.0633805	0.0179454	0.00508281	0.379808	0.0496364	0.00800778	0.0014101	0.000260859	4.31823	-4.59414	2.07609	-0.311714	0	2.18405	1.36289	1.75367	0	1.42825	0.655	-0.116691	-0.0461523	-0.0814216	2.875		-0.0318401	-0.0525136	1.5707		6.36166e-22	6.09423e-22	40.5265	1.06103	1.31766		0.000574881	1.67693	-6.05443
0.6	551	0.34973	-4.4875	4.62235	0.6	3.14159		0.233609	0.06612	0.018721	0.0053025	0.40717	0.0558971	0.00944049	0.00173802	0.000335923	4.31823	-4.59414	2.07609	-0.311714	0	2.17759	1.36289	1.80437	0	1.52051	0.655	-0.128056	-0.0506471	-0.0893514	2.875		-0.0340375	-0.0571291	1.67582		6.86296e-22	6.54699e-22	40.5265	1.06103	1.31766		0.000619465	1.80698	-6.29448
0.6	599.2	0.36256	-4.58167	4.56717	0.6	3.14159		0.242179	0.0685456	0.0194078	0.00549703	0.432578	0.0619422	0.0108789	0.00208034	0.000417396	4.31823	-4.59414	2.07609	-0.311714	0	2.17188	1.36289	1.85113	0	1.60534	0.655	-0.139258	-0.0550776	-0.0971676	2.875		-0.0360452	-0.061591	1.77314		7.33637e-22	6.96859e-22	40.5265	1.06103	1.31766		0.000661413	1.92934	-6.51101
0.6	800	0.40514		4.40121	0.6	3.14159		0.270621	0.0765958	0.0216871	0.00614261	0.525717	0.0858569	0.0170256	0.00366179	0.000824693	4.31823	-4.59414	2.07609	-0.311714	0	2.15292	1.36289	2.02017	0	1.90994	0.655	-0.185925	-0.0735349	-0.12973	2.875		-0.0431141	-0.0794643	2.12834		9.13905e-22	8.52321e-22	40.5265	1.06103	1.31766		0.000819818	2.39141
0.6	1000	0.43666		4.29266	0.6	3.14159		0.291675	0.082555	0.0233744	0.00662051	0.604621	0.108057	0.0232745	0.00542158	0.00132051	4.31823	-4.59414	2.07609	-0.311714	0	2.13888	1.36289	2.16073	0	2.1611	0.655	-0.232406	-0.0919186	-0.162162	2.875		-0.0487334	-0.0964816	2.42831		1.07485e-21	9.85017e-22	40.5265	1.06103	1.31766		0.000959652	2.7993
0.6	1200	0.4618		4.2133	0.6	3.14159		0.308468	0.0873079	0.0247201	0.00700168	0.674624	0.129072	0.0295851	0.00731703	0.00188998	4.31823	-4.59414	2.07609	-0.311714	0	2.12769	1.36289	2.28363	0	2.37935	0.655	-0.278887	-0.110302	-0.194595	2.875		-0.0534347	-0.112992	2.69433		1.22378e-21	1.10341e-21	40.5265	1.06103	1.31766		0.0010879	3.17339
0.6	1400	0.48277		4.1514	0.6	3.14159		0.322475	0.0912725	0.0258426	0.00731962	0.738441	0.149211	0.0359412	0.00932349	0.00252346	4.31823	-4.59414	2.07609	-0.311714	0	2.11835	1.36289	2.39432	0	2.57498	0.655	-0.325368	-0.128686	-0.227027	2.875		-0.0574947	-0.129148	2.93701		1.36431e-21	1.21181e-21	40.5265	1.06103	1.31766		0.00120805	3.52388
0.6	1600	0.50082		4.10091	0.6	3.14159		0.334532	0.0946851	0.0268089	0.00759329	0.797758	0.168701	0.0423459	0.0114284	0.00321531	4.31823	-4.59414	2.07609	-0.311714	0	2.11031	1.36289	2.49614	0	2.75422	0.655	-0.371849	-0.14707	-0.259459	2.875		-0.0610862	-0.145046	3.16278		1.49871e-21	1.31291e-21	40.5265	1.06103	1.31766		0.00132228	3.8571
0.6	1800	0.51669		4.05849	0.6	3.14159		0.345133	0.0976854	0.0276584	0.0078339	0.85358	0.187674	0.0487953	0.0136208	0.00396068	4.31823	-4.59414	2.07609	-0.311714	0	2.10324	1.36289	2.5911	0	2.92081	0.655	-0.41833	-0.165453	-0.291892	2.875		-0.0643125	-0.160741	3.37548		1.62833e-21	1.40832e-21	40.5265	1.06103	1.31766		0.00143191	4.17689
0.6	2000	0.53089		4.02197	0.6	3.14159		0.354618	0.10037	0.0284185	0.0080492	0.906685	0.206257	0.0552981	0.0158966	0.00475716	4.31823	-4.59414	2.07609	-0.311714	0	2.09692	1.36289	2.6807	0	3.07755	0.655	-0.464811	-0.183837	-0.324324	2.875		-0.0672535	-0.17628	3.57802		1.75422e-21	1.49929e-21	40.5265	1.06103	1.31766		0.00153794	4.48617
0.6	2200	0.54376		3.98999	0.6	3.14159		0.363215	0.102803	0.0291074	0.00824433	0.957588	0.224529	0.0618572	0.0182512	0.00560249	4.31823	-4.59414	2.07609	-0.311714	0	2.09119	1.36289	2.76595	0	3.2263	0.655	-0.511293	-0.202221	-0.356757	2.875		-0.0699624	-0.19169	3.7723		1.87706e-21	1.58663e-21	40.5265	1.06103	1.31766		0.00164104	4.7869
0.6	2400	0.55555		3.96156	0.6	3.14159		0.37109	0.105032	0.0297386	0.00842309	1.00669	0.242559	0.0684781	0.0206825	0.00649532	4.31823	-4.59414	2.07609	-0.311714	0	2.08594	1.36289	2.84763	0	3.36851	0.655	-0.557774	-0.220605	-0.389189	2.875		-0.0724809	-0.206995	3.95982		1.99742e-21	1.67102e-21	40.5265	1.06103	1.31766		0.00174173	5.08062
0.6	2600	0.56643		3.93603	0.6	3.14159		0.378358	0.107089	0.030321	0.00858805	1.05424	0.260379	0.0751561	0.0231853	0.00743332	4.31823	-4.59414	2.07609	-0.311714	0	2.08109	1.36289	2.92622	0	3.50506	0.655	-0.604255	-0.238988	-0.421622	2.875		-0.0748341	-0.222209	4.1415		2.11561e-21	1.75282e-21	40.5265	1.06103	1.31766		0.00184034	5.36826
0.6	2800	0.57655		3.91287	0.6	3.14159		0.385117	0.109003	0.0308627	0.00874148	1.10051	0.278042	0.0818996	0.0257598	0.00841627	4.31823	-4.59414	2.07609	-0.311714	0	2.07659	1.36289	3.00225	0	3.6369	0.655	-0.650736	-0.257372	-0.454054	2.875		-0.0770504	-0.237347	4.31832		2.23201e-21	1.8325e-21	40.5265	1.06103	1.31766		0.00193721	5.65086
0.6	3000	0.58602		3.89168	0.6	3.14159		0.391443	0.110793	0.0313696	0.00888506	1.14569	0.295585	0.0887118	0.0284051	0.00944351	4.31823	-4.59414	2.07609	-0.311714	0	2.07237	1.36289	3.07607	0	3.76472	0.655	-0.697217	-0.275756	-0.486486	2.875		-0.0791495	-0.25242	4.49098		2.34688e-21	1.91035e-21	40.5265	1.06103	1.31766		0.00203261	5.92914	-9.84006
0.5	5.6	0.0050516	0	19.3383	0.5	3.14159		0.00315371	0.000896035	0.000254677	7.24132e-05	0.00317371	5.01501e-06	1.0555e-08	2.49813e-11	6.29028e-14	4.33744	-4.58809	2.06464	-0.308348	0	2.33123	1.36289	1.00685	0	0.0137428	0.655	-0.00130147	-0.000514744	-0.000908108	2.875		-0.000234563	-0.000519124	0.0151961		5.51724e-24	4.91866e-24	40.5265	1.06103	1.31766		4.89005e-06	0.0142643	-0.0142643
0.5	16	0.014561	-0.12833	13.5883	0.5	3.14159		0.00909042	0.00258278	0.000734095	0.000208728	0.00925823	4.23368e-05	2.57352e-07	1.75778e-09	1.27985e-11	4.33744	-4.58809	2.06464	-0.308348	0	2.32727	1.36289	1.01996	0	0.0399633	0.655	-0.00371849	-0.0014707	-0.00259459	2.875		-0.000690004	-0.00149416	0.0441378		1.6023e-23	1.43622e-23	40.5265	1.06103	1.31766		1.42218e-05	0.041485	-0.169815
0.5	31	0.028548	-0.3325	10.8568	0.5	3.14159		0.0178225	0.00506374	0.00143925	0.000409227	0.0184772	0.000166628	1.99165e-06	2.67176e-08	3.81851e-10	4.33744	-4.58809	2.06464	-0.308348	0	2.32145	1.36289	1.03972	0	0.0793832	0.655	-0.00720458	-0.00284948	-0.00502703	2.875		-0.00139323	-0.00292604	0.0875347		3.17822e-23	2.87047e-23	40.5265	1.06103	1.31766		2.8266e-05	0.0824518	-0.414952
0.5	45.6	0.042431	-0.525	9.51334	0.5	3.14159		0.0264896	0.00752626	0.00213917	0.000608236	0.0279576	0.000376919	6.7156e-06	1.34134e-07	2.85266e-09	4.33744	-4.58809	2.06464	-0.308348	0	2.31567	1.36289	1.05994	0	0.119549	0.655	-0.0105977	-0.00419149	-0.00739459	2.875		-0.00213109	-0.00434923	0.131631		4.782e-23	4.34965e-23	40.5265	1.06103	1.31766		4.26095e-05	0.124292	-0.649292
0.5	60.4	0.056718	-0.72083	8.63615	0.5	3.14159		0.035409	0.0100604	0.00285945	0.000813036	0.0380728	0.000690257	1.64888e-05	4.41028e-07	1.25529e-08	4.33744	-4.58809	2.06464	-0.308348	0	2.30973	1.36289	1.0814	0	0.162006	0.655	-0.0140373	-0.00555188	-0.00979459	2.875		-0.00293265	-0.0058215	0.178133		6.47789e-23	5.9326e-23	40.5265	1.06103	1.31766		5.78261e-05	0.168679	-0.889509
0.5	81	0.076832	-1	7.80513	0.5	3.14159		0.0479661	0.0136282	0.0038735	0.00110136	0.0529639	0.00131185	4.26311e-05	1.54859e-06	5.98108e-08	4.33744	-4.58809	2.06464	-0.308348	0	2.30136	1.36289	1.11278	0	0.223796	0.655	-0.0188249	-0.00744541	-0.0131351	2.875		-0.00413541	-0.00791882	0.245652		8.95236e-23	8.27155e-23	40.5265	1.06103	1.31766		8.01048e-05	0.233666	-1.23367
0.5	100.6	0.096031	-1.2475	7.24586	0.5	3.14159		0.0599521	0.0170336	0.00484142	0.00137658	0.0679293	0.00212012	8.64652e-05	3.9354e-06	1.90292e-07	4.33744	-4.58809	2.06464	-0.308348	0	2.29337	1.36289	1.14407	0	0.285089	0.655	-0.02338	-0.00924701	-0.0163135	2.875		-0.00536659	-0.00996227	0.312492		1.14203e-22	1.06322e-22	40.5265	1.06103	1.31766		0.000102398	0.298694	-1.54619
0.5	131.6	0.12601	-1.63583	6.61849	0.5	3.14159		0.0786679	0.0223512	0.00635281	0.00180632	0.0928831	0.0038528	0.000207502	1.24407e-05	7.91409e-07	4.33744	-4.58809	2.06464	-0.308348	0	2.28089	1.36289	1.19575	0	0.385623	0.655	-0.0305846	-0.0120965	-0.0213405	2.875		-0.00745746	-0.0132735	0.421961		1.55118e-22	1.45897e-22	40.5265	1.06103	1.31766		0.00013947	0.406833	-2.04266
0.5	162.8	0.155	-1.9925	6.17708	0.5	3.14159		0.0967664	0.0274933	0.00781435	0.00222188	0.119021	0.00614864	0.000409875	3.03417e-05	2.38029e-06	4.33744	-4.58809	2.06464	-0.308348	0	2.26882	1.36289	1.24924	0	0.488872	0.655	-0.0378357	-0.0149643	-0.0264	2.875		-0.00968295	-0.0166731	0.53434		1.97881e-22	1.87614e-22	40.5265	1.06103	1.31766		0.00017831	0.520129	-2.51263
0.5	200.6	0.18766	-2.38333	5.79567	0.5	3.14159		0.117156	0.0332865	0.00946091	0.00269005	0.151092	0.009584	0.000778969	7.01154e-05	6.67894e-06	4.33744	-4.58809	2.06464	-0.308348	0	2.25523	1.36289	1.31406	0	0.612967	0.655	-0.0466206	-0.0184389	-0.0325297	2.875		-0.0124423	-0.0208266	0.669567		2.50517e-22	2.39139e-22	40.5265	1.06103	1.31766		0.000226163	0.659717	-3.04305
0.5	253.6	0.22799	-2.81833	5.43153	0.5	3.14159		0.142334	0.04044	0.0114942	0.00326817	0.19502	0.0152941	0.00152352	0.000167501	1.94554e-05	4.33744	-4.58809	2.06464	-0.308348	0	2.23844	1.36289	1.40151	0	0.778809	0.655	-0.0589381	-0.0233106	-0.0411243	2.875		-0.0162389	-0.0266103	0.850935		3.23371e-22	3.10255e-22	40.5265	1.06103	1.31766		0.000292344	0.852766	-3.6711
0.5	300.2	0.25827	-3.11917	5.21038	0.5	3.14159		0.161238	0.045811	0.0130207	0.00370222	0.231554	0.0208446	0.00236789	0.000296113	3.90702e-05	4.33744	-4.58809	2.06464	-0.308348	0	2.22584	1.36289	1.47318	0	0.913514	0.655	-0.0697682	-0.027594	-0.0486811	2.875		-0.0193872	-0.0315908	0.999078		3.84943e-22	3.69826e-22	40.5265	1.06103	1.31766		0.000348137	1.01552	-4.13469
0.5	350	0.28596	-3.3625	5.03646	0.5	3.14159		0.178525	0.0507226	0.0144167	0.00409915	0.267972	0.0270357	0.00342128	0.000475498	6.96445e-05	4.33744	-4.58809	2.06464	-0.308348	0	2.21432	1.36289	1.54373	0	1.04519	0.655	-0.081342	-0.0321715	-0.0567568	2.875		-0.022499	-0.0367737	1.14483		4.47435e-22	4.29551e-22	40.5265	1.06103	1.31766		0.000404573	1.18014	-4.54264
0.5	401	0.31024	-3.58333	4.90149	0.5	3.14159		0.193683	0.0550293	0.0156408	0.0044472	0.302525	0.0334694	0.00461989	0.000698923	0.000111315	4.33744	-4.58809	2.06464	-0.308348	0	2.20421	1.36289	1.60993	0	1.16795	0.655	-0.0931947	-0.0368594	-0.065027	2.875		-0.0254159	-0.0419326	1.2817		5.07901e-22	4.86511e-22	40.5265	1.06103	1.31766		0.000458962	1.33879	-4.92212
0.5	450.7	0.33074	-3.74083	4.79805	0.5	3.14159		0.206481	0.0586655	0.0166743	0.00474106	0.33379	0.0397271	0.00587279	0.000949861	0.000161591	4.33744	-4.58809	2.06464	-0.308348	0	2.19568	1.36289	1.66923	0	1.27736	0.655	-0.104745	-0.0414277	-0.0730865	2.875		-0.0280183	-0.0468273	1.40459		5.63681e-22	5.38275e-22	40.5265	1.06103	1.31766		0.000508932	1.48456	-5.22539
0.5	501.3	0.34904	-3.86	4.71269	0.5	3.14159		0.217905	0.0619115	0.0175969	0.00500339	0.363455	0.0460234	0.00720949	0.00123371	0.000221881	4.33744	-4.58809	2.06464	-0.308348	0	2.18806	1.36289	1.72502	0	1.37981	0.655	-0.116505	-0.0460788	-0.0812919	2.875		-0.0304496	-0.0516901	1.52053		6.17616e-22	5.87578e-22	40.5265	1.06103	1.31766		0.000557054	1.62493	-5.48493
0.5	551.2	0.36506	-3.95917	4.64272	0.5	3.14159		0.227907	0.064753	0.0184046	0.00523303	0.390885	0.0521388	0.00857314	0.00153784	0.00028972	4.33744	-4.58809	2.06464	-0.308348	0	2.1814	1.36289	1.77621	0	1.47345	0.655	-0.128102	-0.0506655	-0.0893838	2.875		-0.0326625	-0.0563837	1.62725		6.68385e-22	6.3332e-22	40.5265	1.06103	1.31766		0.000602178	1.75655	-5.71572
0.5	600	0.37914	-4.04167	4.58452	0.5	3.14159		0.236697	0.0672505	0.0191144	0.00543486	0.416194	0.058019	0.00993949	0.00185536	0.000363519	4.33744	-4.58809	2.06464	-0.308348	0	2.17554	1.36289	1.82313	0	1.55897	0.655	-0.139443	-0.0551512	-0.0972973	2.875		-0.0346723	-0.0608886	1.7254		7.16016e-22	6.75649e-22	40.5265	1.06103	1.31766		0.000644359	1.8796	-5.92127
0.5	800	0.42529		4.41231	0.5	3.14159		0.265508	0.0754364	0.0214411	0.00609641	0.507903	0.0810812	0.0157453	0.00331855	0.00073267	4.33744	-4.58809	2.06464	-0.308348	0	2.15633	1.36289	1.99073	0	1.86247	0.655	-0.185925	-0.0735349	-0.12973	2.875		-0.0416783	-0.0786715	2.07927		8.9511e-22	8.29949e-22	40.5265	1.06103	1.31766		0.000801695	2.33854
0.5	1000	0.45968		4.29941	0.5	3.14159		0.286978	0.0815364	0.0231748	0.00658938	0.586204	0.102728	0.0217327	0.00497547	0.00119142	4.33744	-4.58809	2.06464	-0.308348	0	2.14201	1.36289	2.13118	0	2.11464	0.655	-0.232406	-0.0919186	-0.162162	2.875		-0.0473017	-0.095691	2.38024		1.05611e-21	9.6271e-22	40.5265	1.06103	1.31766		0.00094158	2.74659
0.5	1200	0.48713		4.21708	0.5	3.14159		0.304115	0.0864054	0.0245587	0.00698287	0.655825	0.123314	0.0278214	0.00677679	0.00172449	4.33744	-4.58809	2.06464	-0.308348	0	2.13059	1.36289	2.25423	0	2.33418	0.655	-0.278887	-0.110302	-0.194595	2.875		-0.0520238	-0.112213	2.64758		1.20531e-21	1.08143e-21	40.5265	1.06103	1.31766		0.00107009	3.12145
0.5	1400	0.51002		4.15303	0.5	3.14159		0.318405	0.0904655	0.0257127	0.00731099	0.719354	0.143094	0.0339812	0.00869539	0.00232218	4.33744	-4.58809	2.06464	-0.308348	0	2.12106	1.36289	2.36515	0	2.53111	0.655	-0.325368	-0.128686	-0.227027	2.875		-0.05611	-0.128384	2.89158		1.34618e-21	1.19023e-21	40.5265	1.06103	1.31766		0.00119057	3.47289
0.5	1600	0.52971		4.10092	0.5	3.14159		0.330697	0.0939581	0.0267054	0.00759324	0.778427	0.162271	0.0402072	0.010717	0.00297868	4.33744	-4.58809	2.06464	-0.308348	0	2.11287	1.36289	2.46722	0	2.71158	0.655	-0.371849	-0.14707	-0.259459	2.875		-0.059729	-0.144296	3.11861		1.48094e-21	1.29176e-21	40.5265	1.06103	1.31766		0.00130515	3.80713
0.5	1800	0.54701		4.05722	0.5	3.14159		0.341498	0.0970267	0.0275776	0.00784123	0.834033	0.180963	0.0464912	0.0128298	0.00368908	4.33744	-4.58809	2.06464	-0.308348	0	2.10567	1.36289	2.56241	0	2.87932	0.655	-0.41833	-0.165453	-0.291892	2.875		-0.0629829	-0.160007	3.3325		1.61093e-21	1.3876e-21	40.5265	1.06103	1.31766		0.00141513	4.12793
0.5	2000	0.56249		4.01966	0.5	3.14159		0.351162	0.0997725	0.028358	0.00806313	0.886976	0.199301	0.0528436	0.0150304	0.00445147	4.33744	-4.58809	2.06464	-0.308348	0	2.09923	1.36289	2.65231	0	3.03726	0.655	-0.464811	-0.183837	-0.324324	2.875		-0.0659551	-0.175563	3.53626		1.73722e-21	1.47906e-21	40.5265	1.06103	1.31766		0.00152155	4.43836
0.5	2200	0.57651		3.98681	0.5	3.14159		0.359915	0.102259	0.0290648	0.0082641	0.937724	0.217346	0.0592603	0.0173122	0.00526297	4.33744	-4.58809	2.06464	-0.308348	0	2.09339	1.36289	2.73783	0	3.18713	0.655	-0.511293	-0.202221	-0.356757	2.875		-0.0686942	-0.19099	3.7317		1.86046e-21	1.56688e-21	40.5265	1.06103	1.31766		0.00162503	4.74021
0.5	2400	0.58934		3.95766	0.5	3.14159		0.367924	0.104535	0.0297117	0.00844802	0.98666	0.235157	0.0657427	0.0196717	0.00612182	4.33744	-4.58809	2.06464	-0.308348	0	2.08805	1.36289	2.81973	0	3.33033	0.655	-0.557774	-0.220605	-0.389189	2.875		-0.07124	-0.20631	3.92024		1.98118e-21	1.65168e-21	40.5265	1.06103	1.31766		0.00172607	5.03493
0.5	2600	0.60118		3.93151	0.5	3.14159		0.375316	0.106635	0.0303086	0.00861774	1.03407	0.252778	0.0722919	0.0221059	0.00702656	4.33744	-4.58809	2.06464	-0.308348	0	2.08312	1.36289	2.89858	0	3.46791	0.655	-0.604255	-0.238988	-0.421622	2.875		-0.0736227	-0.22154	4.10299		2.09975e-21	1.73395e-21	40.5265	1.06103	1.31766		0.00182505	5.32366
0.5	2800	0.61219		3.9078	0.5	3.14159		0.38219	0.108588	0.0308637	0.00877556	1.08022	0.270258	0.0789133	0.024614	0.00797668	4.33744	-4.58809	2.06464	-0.308348	0	2.07854	1.36289	2.97487	0	3.60077	0.655	-0.650736	-0.257372	-0.454054	2.875		-0.0758691	-0.236695	4.28086		2.21655e-21	1.81409e-21	40.5265	1.06103	1.31766		0.0019223	5.60736
0.5	3000	0.62249		3.88612	0.5	3.14159		0.38862	0.110415	0.0313829	0.00892321	1.1253	0.287631	0.0856091	0.0271949	0.0089715	4.33744	-4.58809	2.06464	-0.308348	0	2.07425	1.36289	3.04896	0	3.7296	0.655	-0.697217	-0.275756	-0.486486	2.875		-0.0779988	-0.251785	4.45457		2.33181e-21	1.89242e-21	40.5265	1.06103	1.31766		0.00201809	5.88677	-9.03094
0.4	5.65	0.0053692	0	19.2876	0.4	3.14159		0.00314177	0.000896127	0.000255695	7.29849e-05	0.00316162	4.97695e-06	1.04352e-08	2.46043e-11	6.1862e-14	4.3571	-4.58171	2.05286	-0.304912	0	2.33124	1.36289	1.00684	0	0.0137527	0.655	-0.00131309	-0.00051934	-0.000916216	2.875		-0.000234898	-0.000522788	0.015217		5.54348e-24	4.93517e-24	40.5265	1.06103	1.31766		4.91151e-06	0.0143269	-0.0143269
0.4	16	0.015314	-0.10583	13.6004	0.4	3.14159		0.00896094	0.00255593	0.000729293	0.000208167	0.00912397	4.1125e-05	2.46415e-07	1.65906e-09	1.19077e-11	4.3571	-4.58171	2.05286	-0.304912	0	2.32736	1.36289	1.01971	0	0.0395661	0.655	-0.00371849	-0.0014707	-0.00259459	2.875		-0.000683218	-0.00149041	0.043733		1.59342e-23	1.42565e-23	40.5265	1.06103	1.31766		1.41362e-05	0.0412352	-0.147065
0.4	31	0.029952	-0.270835	10.8753	0.4	3.14159		0.0175263	0.00499903	0.00142639	0.000407145	0.0181591	0.000161007	1.89229e-06	2.49614e-08	3.50808e-10	4.3571	-4.58171	2.05286	-0.304912	0	2.32165	1.36289	1.03913	0	0.0783872	0.655	-0.00720458	-0.00284948	-0.00502703	2.875		-0.00137476	-0.00291585	0.0865179		3.15405e-23	2.84169e-23	40.5265	1.06103	1.31766		2.80329e-05	0.0817719	-0.352607
0.4	45.5	0.044313	-0.438335	9.54418	0.4	3.14159		0.0259296	0.0073959	0.0021103	0.000602358	0.0273348	0.000360596	6.28776e-06	1.22919e-07	2.55869e-09	4.3571	-4.58171	2.05286	-0.304912	0	2.31605	1.36289	1.05875	0	0.117461	0.655	-0.0105745	-0.0041823	-0.00737838	2.875		-0.00209045	-0.00431983	0.129476		4.72443e-23	4.28407e-23	40.5265	1.06103	1.31766		4.20621e-05	0.122695	-0.56103
0.4	60.55	0.059377	-0.61583	8.65718	0.4	3.14159		0.0347443	0.0099101	0.00282769	0.000807127	0.0373061	0.000663361	1.55454e-05	4.07932e-07	1.13919e-08	4.3571	-4.58171	2.05286	-0.304912	0	2.31017	1.36289	1.07995	0	0.159539	0.655	-0.0140722	-0.00556567	-0.00981892	2.875		-0.00288154	-0.00580371	0.175641		6.41754e-23	5.85634e-23	40.5265	1.06103	1.31766		5.72325e-05	0.166947	-0.782777
0.4	80.9	0.079874	-0.851665	7.84237	0.4	3.14159		0.046738	0.0133311	0.00380381	0.00108575	0.0514727	0.00124124	3.92874e-05	1.39024e-06	5.23112e-08	4.3571	-4.58171	2.05286	-0.304912	0	2.30217	1.36289	1.10989	0	0.218665	0.655	-0.0188016	-0.00743621	-0.0131189	2.875		-0.00402583	-0.00785136	0.240376		8.80456e-23	8.09856e-23	40.5265	1.06103	1.31766		7.86872e-05	0.22953	-1.0812
0.4	100.9	0.099986	-1.07292	7.27673	0.4	3.14159		0.0585065	0.0166878	0.00476159	0.00135914	0.0660839	0.00201082	7.99906e-05	3.55187e-06	1.67572e-07	4.3571	-4.58171	2.05286	-0.304912	0	2.29433	1.36289	1.14054	0	0.278884	0.655	-0.0234497	-0.00927459	-0.0163622	2.875		-0.00522674	-0.00990591	0.306194		1.12504e-22	1.04211e-22	40.5265	1.06103	1.31766		0.000100736	0.293847	-1.36676
0.4	130.85	0.12961	-1.40041	6.67374	0.4	3.14159		0.0758409	0.0216321	0.00617237	0.00176182	0.0889836	0.00355154	0.000184225	1.06419e-05	6.52395e-07	4.3571	-4.58171	2.05286	-0.304912	0	2.28277	1.36289	1.18814	0	0.371813	0.655	-0.0304103	-0.0120275	-0.0212189	2.875		-0.00714151	-0.0130469	0.407638		1.50654e-22	1.40805e-22	40.5265	1.06103	1.31766		0.000135223	0.394446	-1.79486
0.4	161.4	0.15864	-1.69958	6.23895	0.4	3.14159		0.0928277	0.0264772	0.00755485	0.00215643	0.113154	0.00559249	0.000357143	2.53411e-05	1.90602e-06	4.3571	-4.58171	2.05286	-0.304912	0	2.27145	1.36289	1.23783	0	0.468127	0.655	-0.0375103	-0.0148357	-0.026173	2.875		-0.00919328	-0.0163053	0.512747		1.9086e-22	1.79668e-22	40.5265	1.06103	1.31766		0.000171647	0.500693	-2.20028
0.4	201.15	0.19382	-2.05166	5.83601	0.4	3.14159		0.113413	0.0323488	0.00923021	0.00263464	0.144983	0.00887966	0.000697759	6.0751e-05	5.59904e-06	4.3571	-4.58171	2.05286	-0.304912	0	2.25772	1.36289	1.30248	0	0.592434	0.655	-0.0467484	-0.0184894	-0.0326189	2.875		-0.011924	-0.0205786	0.648568		2.43972e-22	2.31187e-22	40.5265	1.06103	1.31766		0.000219809	0.641183	-2.69285
0.4	252.4	0.23409	-2.41583	5.4801	0.4	3.14159		0.136977	0.0390699	0.011148	0.00318205	0.185242	0.0139284	0.00133277	0.000140852	1.57321e-05	4.3571	-4.58171	2.05286	-0.304912	0	2.24202	1.36289	1.38308	0	0.745994	0.655	-0.0586592	-0.0232003	-0.0409297	2.875		-0.015396	-0.0260613	0.816918		3.11813e-22	2.96851e-22	40.5265	1.06103	1.31766		0.000281291	0.820525	-3.23635
0.4	300.95	0.267	-2.68959	5.245	0.4	3.14159		0.156234	0.0445627	0.0127152	0.0036294	0.221564	0.0192588	0.00211613	0.000256139	3.2723e-05	4.3571	-4.58171	2.05286	-0.304912	0	2.22918	1.36289	1.45477	0	0.881407	0.655	-0.0699425	-0.0276629	-0.0488027	2.875		-0.0185224	-0.0311654	0.966158		3.7395e-22	3.56521e-22	40.5265	1.06103	1.31766		0.00033748	0.984429	-3.67401
0.4	350.7	0.29605	-2.90166	5.0675	0.4	3.14159		0.173233	0.0494112	0.0140987	0.00402428	0.256499	0.0250178	0.00306633	0.000413056	5.86591e-05	4.3571	-4.58171	2.05286	-0.304912	0	2.21784	1.36289	1.52288	0	1.00914	0.655	-0.0815047	-0.0322359	-0.0568703	2.875		-0.0215072	-0.0362747	1.10781		4.34758e-22	4.14256e-22	40.5265	1.06103	1.31766		0.000392295	1.14432	-4.04599
0.4	400.7	0.32129	-3.08542	4.93117	0.4	3.14159		0.188002	0.0536238	0.0153007	0.00436738	0.289273	0.0309402	0.00413714	0.000606773	9.37231e-05	4.3571	-4.58171	2.05286	-0.304912	0	2.208	1.36289	1.58609	0	1.12694	0.655	-0.093125	-0.0368318	-0.0649784	2.875		-0.024277	-0.0412828	1.23935		4.92861e-22	4.68697e-22	40.5265	1.06103	1.31766		0.000444482	1.29656	-4.38197
0.4	450.8	0.34335	-3.21958	4.82322	0.4	3.14159		0.20091	0.0573056	0.0163512	0.00466724	0.319935	0.0369048	0.00529783	0.000832721	0.000137724	4.3571	-4.58171	2.05286	-0.304912	0	2.19939	1.36289	1.64465	0	1.23553	0.655	-0.104769	-0.0414369	-0.0731027	2.875		-0.0268348	-0.0461807	1.36145		5.48234e-22	5.19859e-22	40.5265	1.06103	1.31766		0.000494029	1.44108	-4.66066
0.4	501.3	0.36295	-3.32375	4.73478	0.4	3.14159		0.212379	0.0605769	0.0172846	0.00493367	0.348891	0.0428898	0.00653525	0.00108863	0.00019066	4.3571	-4.58171	2.05286	-0.304912	0	2.19175	1.36289	1.69948	0	1.33673	0.655	-0.116505	-0.0460788	-0.0812919	2.875		-0.0292161	-0.051009	1.47606		6.01469e-22	5.68359e-22	40.5265	1.06103	1.31766		0.000541484	1.57951	-4.90326
0.4	551.95	0.38044	-3.40625	4.66108	0.4	3.14159		0.222613	0.063496	0.0181175	0.00517142	0.376191	0.0488288	0.00782745	0.00136984	0.000251869	4.3571	-4.58171	2.05286	-0.304912	0	2.18492	1.36289	1.75078	0	1.43103	0.655	-0.128276	-0.0507345	-0.0895054	2.875		-0.0314274	-0.0557539	1.58361		6.52546e-22	6.14246e-22	40.5265	1.06103	1.31766		0.000586847	1.71183	-5.11808
0.4	599.5	0.39524	-3.47743	4.60216	0.4	3.14159		0.231273	0.0659661	0.0188224	0.0053726	0.400442	0.0543331	0.00907696	0.00165351	0.00031628	4.3571	-4.58171	2.05286	-0.304912	0	2.17915	1.36289	1.79604	0	1.51396	0.655	-0.139327	-0.0551052	-0.0972162	2.875		-0.0333625	-0.0601305	1.67881		6.98653e-22	6.55128e-22	40.5265	1.06103	1.31766		0.000627654	1.83087	-5.3083
0.4	800	0.44539	-1.40041	4.42251	0.4	3.14159		0.260619	0.0743362	0.0212106	0.0060543	0.491323	0.0767196	0.0145979	0.00301666	0.000653245	4.3571	-4.58171	2.05286	-0.304912	0	2.15959	1.36289	1.96328	0	1.81829	0.655	-0.185925	-0.0735349	-0.12973	2.875		-0.040351	-0.0779386	2.03359		8.77737e-22	8.0927e-22	40.5265	1.06103	1.31766		0.000784942	2.28968
0.4	1000	0.48275	-1.69958	4.30535	0.4	3.14159		0.28248	0.0805717	0.0229898	0.00656214	0.569019	0.0978347	0.0203394	0.0045787	0.00107844	4.3571	-4.58171	2.05286	-0.304912	0	2.14501	1.36289	2.10358	0	2.07138	0.655	-0.232406	-0.0919186	-0.162162	2.875		-0.045978	-0.0949601	2.33549		1.03878e-21	9.42085e-22	40.5265	1.06103	1.31766		0.000924872	2.69785
0.4	1200	0.51259	-2.05166	4.22013	0.4	3.14159		0.29994	0.085552	0.0244109	0.00696777	0.638236	0.118001	0.0262167	0.00629212	0.0015781	4.3571	-4.58171	2.05286	-0.304912	0	2.13337	1.36289	2.22673	0	2.29211	0.655	-0.278887	-0.110302	-0.194595	2.875		-0.0507189	-0.111492	2.60404		1.18823e-21	1.06109e-21	40.5265	1.06103	1.31766		0.00105362	3.0734
0.4	1400	0.53748	-2.41583	4.15395	0.4	3.14159		0.314505	0.0897062	0.0255962	0.0073061	0.701488	0.13744	0.0321919	0.00812912	0.00214297	4.3571	-4.58171	2.05286	-0.304912	0	2.12366	1.36289	2.33788	0	2.49035	0.655	-0.325368	-0.128686	-0.227027	2.875		-0.0548329	-0.127678	2.84939		1.32947e-21	1.17034e-21	40.5265	1.06103	1.31766		0.00117445	3.42587
0.4	1600	0.55888	-2.68959	4.10024	0.4	3.14159		0.327027	0.0932779	0.0266153	0.007597	0.760335	0.156321	0.0382504	0.0100734	0.00276703	4.3571	-4.58171	2.05286	-0.304912	0	2.11532	1.36289	2.44021	0	2.67209	0.655	-0.371849	-0.14707	-0.259459	2.875		-0.0584816	-0.143607	3.07772		1.46462e-21	1.27233e-21	40.5265	1.06103	1.31766		0.00128941	3.7612
0.4	1800	0.57769	-2.90166	4.05525	0.4	3.14159		0.338033	0.0964173	0.0275111	0.00785269	0.815801	0.174768	0.0443864	0.0121146	0.00344608	4.3571	-4.58171	2.05286	-0.304912	0	2.10798	1.36289	2.53576	0	2.84121	0.655	-0.41833	-0.165453	-0.291892	2.875		-0.0617716	-0.159338	3.29303		1.59507e-21	1.36873e-21	40.5265	1.06103	1.31766		0.00139984	4.08333
0.4	2000	0.59449	-3.08542	4.01668	0.4	3.14159		0.347864	0.0992212	0.0283112	0.00808105	0.868555	0.192863	0.0505932	0.0142438	0.00417655	4.3571	-4.58171	2.05286	-0.304912	0	2.10142	1.36289	2.62589	0	3.00026	0.655	-0.464811	-0.183837	-0.324324	2.875		-0.0647727	-0.17491	3.49793		1.72174e-21	1.46063e-21	40.5265	1.06103	1.31766		0.00150663	4.39483
0.4	2200	0.60971	-3.21958	3.98298	0.4	3.14159		0.35677	0.101761	0.029036	0.00828794	0.919172	0.210698	0.056878	0.0164585	0.00495705	4.3571	-4.58171	2.05286	-0.304912	0	2.09549	1.36289	2.71172	0	3.15131	0.655	-0.511293	-0.202221	-0.356757	2.875		-0.067545	-0.190355	3.69459		1.84542e-21	1.54897e-21	40.5265	1.06103	1.31766		0.00161052	4.69789
0.4	2400	0.62364	-3.32375	3.9531	0.4	3.14159		0.364921	0.104086	0.0296994	0.0084773	0.968021	0.228327	0.06324	0.0187546	0.00578578	4.3571	-4.58171	2.05286	-0.304912	0	2.09005	1.36289	2.79397	0	3.29574	0.655	-0.557774	-0.220605	-0.389189	2.875		-0.070127	-0.205695	3.8844		1.96661e-21	1.63434e-21	40.5265	1.06103	1.31766		0.00171202	4.99395
0.4	2600	0.63648	-3.40625	3.92634	0.4	3.14159		0.372434	0.106229	0.0303108	0.00865184	1.01532	0.245767	0.0696707	0.0211258	0.00666014	4.3571	-4.58171	2.05286	-0.304912	0	2.08504	1.36289	2.87311	0	3.43441	0.655	-0.604255	-0.238988	-0.421622	2.875		-0.0725421	-0.220943	4.06828		2.08561e-21	1.71711e-21	40.5265	1.06103	1.31766		0.00181141	5.28387
0.4	2800	0.64842	-3.47743	3.90209	0.4	3.14159		0.379421	0.108222	0.0308795	0.00881414	1.06139	0.263086	0.0761818	0.0235739	0.00758056	4.3571	-4.58171	2.05286	-0.304912	0	2.08039	1.36289	2.94972	0	3.56839	0.655	-0.650736	-0.257372	-0.454054	2.875		-0.0748228	-0.236117	4.24731		2.20285e-21	1.79779e-21	40.5265	1.06103	1.31766		0.0019091	5.56884
0.4	3000	0.65959	-3.47743	3.87993	0.4	3.14159		0.385957	0.110086	0.0314114	0.00896598	1.1064	0.280313	0.082775	0.0260973	0.00854638	4.3571	-4.58171	2.05286	-0.304912	0	2.07603	1.36289	3.02416	0	3.69836	0.655	-0.697217	-0.275756	-0.486486	2.875		-0.0769884	-0.251227	4.42219		2.31859e-21	1.87668e-21	40.5265	1.06103	1.31766		0.00200534	5.84957	-8.27441
0.3	5.7	0.0056914	0	19.2373	0.3	3.14159		0.00312939	0.000896149	0.000256709	7.35598e-05	0.00314908	4.93765e-06	1.0312e-08	2.42178e-11	6.05575e-14	4.37723	-4.57497	2.04075	-0.301405	0	2.33125	1.36289	1.00683	0	0.0137617	0.655	-0.00132471	-0.000523936	-0.000924324	2.875		-0.000235225	-0.000526446	0.0152369		5.5696e-24	4.95154e-24	40.5265	1.06103	1.31766		4.93286e-06	0.0143891	-0.0143891
0.3	16	0.016066	-0.08333	13.6117	0.3	3.14159		0.00883382	0.0025297	0.000724653	0.000207649	0.00899222	3.99528e-05	2.35985e-07	1.56626e-09	1.10819e-11	4.37723	-4.57497	2.04075	-0.301405	0	2.32744	1.36289	1.01947	0	0.0391787	0.655	-0.00371849	-0.0014707	-0.00259459	2.875		-0.000676641	-0.00148678	0.0433382		1.58481e-23	1.4154e-23	40.5265	1.06103	1.31766		1.40531e-05	0.040993	-0.124323
0.3	31	0.031353	-0.20917	10.8924	0.3	3.14159		0.0172393	0.00493674	0.00141417	0.000405229	0.0178512	0.000155655	1.79926e-06	2.33442e-08	3.22696e-10	4.37723	-4.57497	2.04075	-0.301405	0	2.32184	1.36289	1.03855	0	0.0774305	0.655	-0.00720458	-0.00284948	-0.00502703	2.875		-0.00135715	-0.00290612	0.0855414		3.131e-23	2.81426e-23	40.5265	1.06103	1.31766		2.78106e-05	0.0811235	-0.290294
0.3	45.4	0.046183	-0.35167	9.57317	0.3	3.14159		0.0253935	0.00727182	0.00208307	0.000596903	0.0267399	0.000345331	5.89603e-06	1.12866e-07	2.30069e-09	4.37723	-4.57497	2.04075	-0.301405	0	2.3164	1.36289	1.0576	0	0.115479	0.655	-0.0105512	-0.0041731	-0.00736216	2.875		-0.00205214	-0.00429172	0.12743		4.66992e-23	4.22213e-23	40.5265	1.06103	1.31766		4.15441e-05	0.121184	-0.472854
0.3	60.7	0.062043	-0.51083	8.67598	0.3	3.14159		0.0341141	0.00976909	0.00279843	0.000801889	0.0365811	0.0006384	1.46859e-05	3.78341e-07	1.0373e-08	4.37723	-4.57497	2.04075	-0.301405	0	2.31059	1.36289	1.07859	0	0.157233	0.655	-0.014107	-0.00557946	-0.00984324	2.875		-0.0028341	-0.00578795	0.173313		6.36199e-23	5.78582e-23	40.5265	1.06103	1.31766		5.66854e-05	0.165351	-0.676181
0.3	80.8	0.082917	-0.70333	7.87653	0.3	3.14159		0.0455915	0.0130558	0.00373995	0.00107168	0.0500877	0.00117729	3.63353e-05	1.25394e-06	4.60182e-08	4.37723	-4.57497	2.04075	-0.301405	0	2.30294	1.36289	1.10721	0	0.213933	0.655	-0.0187784	-0.00742702	-0.0131027	2.875		-0.00392559	-0.00778905	0.23551		8.66898e-23	7.94013e-23	40.5265	1.06103	1.31766		7.73875e-05	0.225739	-0.929069
0.3	101.2	0.10398	-0.89833	7.3041	0.3	3.14159		0.0571729	0.0163724	0.00468999	0.00134391	0.0643914	0.00191293	7.43283e-05	3.22433e-06	1.48624e-07	4.37723	-4.57497	2.04075	-0.301405	0	2.29522	1.36289	1.13731	0	0.273255	0.655	-0.0235195	-0.00930216	-0.0164108	2.875		-0.00510073	-0.00985721	0.300487		1.10986e-22	1.02315e-22	40.5265	1.06103	1.31766		9.92487e-05	0.289509	-1.18784
0.3	130.1	0.13323	-1.165	6.72485	0.3	3.14159		0.0732559	0.020978	0.0060093	0.00172196	0.0854596	0.00328882	0.000164637	9.18135e-06	5.43475e-07	4.37723	-4.57497	2.04075	-0.301405	0	2.2845	1.36289	1.18126	0	0.359363	0.655	-0.030236	-0.0119586	-0.0210973	2.875		-0.00685957	-0.012839	0.394711		1.46636e-22	1.36243e-22	40.5265	1.06103	1.31766		0.000131406	0.383312	-1.54831
0.3	160	0.16231	-1.40667	6.29653	0.3	3.14159		0.0892454	0.0255568	0.00732095	0.00209781	0.107906	0.00511473	0.000313641	2.13796e-05	1.54522e-06	4.37723	-4.57497	2.04075	-0.301405	0	2.27384	1.36289	1.22762	0	0.449565	0.655	-0.0371849	-0.014707	-0.0259459	2.875		-0.00876031	-0.0159688	0.493401		1.84581e-22	1.72606e-22	40.5265	1.06103	1.31766		0.000165699	0.483344	-1.89001
0.3	201.7	0.20012	-1.72	5.872	0.3	3.14159		0.110035	0.0315102	0.00902636	0.0025865	0.139557	0.00827342	0.000630019	5.31815e-05	4.75311e-06	4.37723	-4.57497	2.04075	-0.301405	0	2.25998	1.36289	1.29222	0	0.57429	0.655	-0.0468762	-0.01854	-0.0327081	2.875		-0.0114693	-0.0203658	0.63003		2.38261e-22	2.24227e-22	40.5265	1.06103	1.31766		0.000214259	0.624995	-2.34499
0.3	251.2	0.24022	-2.01333	5.52518	0.3	3.14159		0.132084	0.0378243	0.0108351	0.00310478	0.17652	0.012755	0.00117488	0.000119606	1.28726e-05	4.37723	-4.57497	2.04075	-0.301405	0	2.24528	1.36289	1.36661	0	0.716677	0.655	-0.0583803	-0.02309	-0.0407351	2.875		-0.0146512	-0.0255666	0.786509		3.0154e-22	2.84976e-22	40.5265	1.06103	1.31766		0.000271476	0.791896	-2.80523
0.3	301.7	0.27581	-2.26	5.27651	0.3	3.14159		0.151653	0.0434281	0.0124403	0.00356477	0.212623	0.0178823	0.00190419	0.000223507	2.7698e-05	4.37723	-4.57497	2.04075	-0.301405	0	2.23223	1.36289	1.43829	0	0.852708	0.655	-0.0701168	-0.0277318	-0.0489243	2.875		-0.0177554	-0.030794	0.936757		3.64238e-22	3.4474e-22	40.5265	1.06103	1.31766		0.000328057	0.956941	-3.21694
0.3	351.4	0.30617	-2.44083	5.09599	0.3	3.14159		0.168346	0.0482085	0.0138097	0.00395717	0.246163	0.0232524	0.00276478	0.000361546	4.98593e-05	4.37723	-4.57497	2.04075	-0.301405	0	2.2211	1.36289	1.50408	0	0.976668	0.655	-0.0816674	-0.0323002	-0.0569838	2.875		-0.0206207	-0.035834	1.0745		4.23461e-22	4.00602e-22	40.5265	1.06103	1.31766		0.000381347	1.11239	-3.55322
0.3	400.4	0.33228	-2.5875	4.95886	0.3	3.14159		0.182703	0.0523197	0.0149874	0.00429463	0.277241	0.0287099	0.00372369	0.000530124	7.95124e-05	4.37723	-4.57497	2.04075	-0.301405	0	2.21153	1.36289	1.56439	0	1.08964	0.655	-0.0930553	-0.0368042	-0.0649297	2.875		-0.0232501	-0.0406949	1.20083		4.79289e-22	4.5263e-22	40.5265	1.06103	1.31766		0.000431418	1.25845	-3.84595
0.3	450.9	0.35591	-2.69833	4.84659	0.3	3.14159		0.195696	0.0560404	0.0160532	0.00460004	0.307312	0.0344013	0.00480131	0.000734245	0.000118191	4.37723	-4.57497	2.04075	-0.301405	0	2.20287	1.36289	1.6222	0	1.19736	0.655	-0.104792	-0.0414461	-0.0731189	2.875		-0.0257641	-0.0455965	1.32211		5.34262e-22	5.03198e-22	40.5265	1.06103	1.31766		0.000480548	1.40176	-4.10009
0.3	501.3	0.37678	-2.7875	4.7554	0.3	3.14159		0.207171	0.0593265	0.0169946	0.00486978	0.335534	0.0400877	0.00594738	0.000965288	0.000164782	4.37723	-4.57497	2.04075	-0.301405	0	2.19522	1.36289	1.676	0	1.29715	0.655	-0.116505	-0.0460788	-0.0812919	2.875		-0.0280922	-0.0503884	1.43522		5.86757e-22	5.50847e-22	40.5265	1.06103	1.31766		0.000527298	1.53813	-4.32563
0.3	552.7	0.39578	-2.85333	4.67805	0.3	3.14159		0.217618	0.0623182	0.0178516	0.00511535	0.362687	0.0458562	0.00717308	0.00122578	0.000220155	4.37723	-4.57497	2.04075	-0.301405	0	2.18825	1.36289	1.72736	0	1.39204	0.655	-0.128451	-0.0508034	-0.089627	2.875		-0.0303003	-0.0551837	1.54351		6.3812e-22	5.96853e-22	40.5265	1.06103	1.31766		0.000572878	1.67108	-4.52441
0.3	599	0.41125	-2.9132	4.61864	0.3	3.14159		0.226124	0.0647541	0.0185493	0.0053153	0.385891	0.0510053	0.00831581	0.00147942	0.000276458	4.37723	-4.57497	2.04075	-0.301405	0	2.18258	1.36289	1.77096	0	1.47231	0.655	-0.139211	-0.0550592	-0.0971351	2.875		-0.0321605	-0.059432	1.63571		6.827e-22	6.36287e-22	40.5265	1.06103	1.31766		0.000612309	1.78611	-4.69931
0.3	800	0.46548		4.43183	0.3	3.14159		0.255942	0.073293	0.0209954	0.00601621	0.475872	0.0727286	0.013567	0.00275039	0.000584464	4.37723	-4.57497	2.04075	-0.301405	0	2.16271	1.36289	1.93766	0	1.77713	0.655	-0.185925	-0.0735349	-0.12973	2.875		-0.0391237	-0.0772609	1.99105		8.61672e-22	7.90147e-22	40.5265	1.06103	1.31766		0.00076945	2.24449
0.3	1000	0.5059		4.3105	0.3	3.14159		0.278167	0.0796574	0.0228185	0.00653862	0.552941	0.0933277	0.0190759	0.00422449	0.00097914	4.37723	-4.57497	2.04075	-0.301405	0	2.14789	1.36289	2.07775	0	2.03103	0.655	-0.232406	-0.0919186	-0.162162	2.875		-0.0447522	-0.0942832	2.29377		1.02274e-21	9.22986e-22	40.5265	1.06103	1.31766		0.000909399	2.65272
0.3	1200	0.53823		4.22241	0.3	3.14159		0.295943	0.0847479	0.0242767	0.00695648	0.621782	0.113099	0.0247561	0.00585691	0.00144842	4.37723	-4.57497	2.04075	-0.301405	0	2.13604	1.36289	2.20102	0	2.25301	0.655	-0.278887	-0.110302	-0.194595	2.875		-0.0495151	-0.110828	2.56359		1.17247e-21	1.04234e-21	40.5265	1.06103	1.31766		0.00103842	3.02908
0.3	1400	0.56519		4.15418	0.3	3.14159		0.310767	0.088993	0.0254927	0.00730493	0.684745	0.132206	0.0305553	0.00761744	0.00198299	4.37723	-4.57497	2.04075	-0.301405	0	2.12616	1.36289	2.31237	0	2.45251	0.655	-0.325368	-0.128686	-0.227027	2.875		-0.0536559	-0.127028	2.81022		1.31406e-21	1.152e-21	40.5265	1.06103	1.31766		0.00115959	3.38253
0.3	1600	0.58838		4.09887	0.3	3.14159		0.323518	0.0926444	0.0265387	0.00760466	0.743405	0.150814	0.0364591	0.00949077	0.00257749	4.37723	-4.57497	2.04075	-0.301405	0	2.11765	1.36289	2.41502	0	2.63563	0.655	-0.371849	-0.14707	-0.259459	2.875		-0.0573391	-0.142977	3.03997		1.44966e-21	1.25453e-21	40.5265	1.06103	1.31766		0.00127499	3.71914
0.3	1800	0.60875		4.05263	0.3	3.14159		0.334719	0.0958518	0.0274575	0.00786793	0.798708	0.169019	0.0424523	0.011464	0.00322723	4.37723	-4.57497	2.04075	-0.301405	0	2.11019	1.36289	2.51089	0	2.80605	0.655	-0.41833	-0.165453	-0.291892	2.875		-0.0606634	-0.158726	3.25662		1.58056e-21	1.35146e-21	40.5265	1.06103	1.31766		0.00138585	4.04253
0.3	2000	0.62695		4.01303	0.3	3.14159		0.344726	0.0987175	0.0282784	0.00810316	0.851369	0.186912	0.0485322	0.0135301	0.00392938	4.37723	-4.57497	2.04075	-0.301405	0	2.10352	1.36289	2.60141	0	2.96649	0.655	-0.464811	-0.183837	-0.324324	2.875		-0.063704	-0.17432	3.46296		1.70775e-21	1.44398e-21	40.5265	1.06103	1.31766		0.00149314	4.35548
0.3	2200	0.64342		3.97849	0.3	3.14159		0.353782	0.101311	0.0290213	0.00831603	0.901877	0.204554	0.0546949	0.0156829	0.00468148	4.37723	-4.57497	2.04075	-0.301405	0	2.09748	1.36289	2.68757	0	3.11879	0.655	-0.511293	-0.202221	-0.356757	2.875		-0.0665123	-0.189785	3.6609		1.8319e-21	1.53288e-21	40.5265	1.06103	1.31766		0.00159749	4.65987
0.3	2400	0.65849		3.9479	0.3	3.14159		0.362068	0.103684	0.029701	0.00851081	0.950638	0.222008	0.0609432	0.0179197	0.00548229	4.37723	-4.57497	2.04075	-0.301405	0	2.09195	1.36289	2.77017	0	3.26445	0.655	-0.557774	-0.220605	-0.389189	2.875		-0.0691311	-0.205145	3.85199		1.95357e-21	1.61883e-21	40.5265	1.06103	1.31766		0.00169945	4.95729
0.3	2600	0.67238		3.92053	0.3	3.14159		0.369705	0.105871	0.0303275	0.00869033	0.99788	0.239295	0.0672689	0.0202346	0.00632942	4.37723	-4.57497	2.04075	-0.301405	0	2.08686	1.36289	2.84968	0	3.40436	0.655	-0.604255	-0.238988	-0.421622	2.875		-0.0715847	-0.220414	4.03715		2.07308e-21	1.7022e-21	40.5265	1.06103	1.31766		0.00179932	5.24862
0.3	2800	0.6853		3.89574	0.3	3.14159		0.376809	0.107905	0.0309103	0.00885732	1.04393	0.256483	0.0736852	0.0226298	0.00722361	4.37723	-4.57497	2.04075	-0.301405	0	2.08213	1.36289	2.92671	0	3.53965	0.655	-0.650736	-0.257372	-0.454054	2.875		-0.073907	-0.235611	4.21754		2.19086e-21	1.78352e-21	40.5265	1.06103	1.31766		0.00189754	5.53512
0.3	3000	0.69736		3.87315	0.3	3.14159		0.38344	0.109804	0.0314542	0.00901319	1.08884	0.273558	0.0801764	0.0250976	0.0081618	4.37723	-4.57497	2.04075	-0.301405	0	2.07771	1.36289	3.00143	0	3.67065	0.655	-0.697217	-0.275756	-0.486486	2.875		-0.0761053	-0.250739	4.39349		2.30703e-21	1.86292e-21	40.5265	1.06103	1.31766		0.00199419	5.81705	-7.52597
0.2	5.55	0.0058085	0	19.4153	0.2	3.14159		0.00300795	0.000864871	0.000248737	7.15543e-05	0.00302614	4.56039e-06	9.15414e-09	2.06639e-11	4.97762e-14	4.39784	-4.56785	2.02829	-0.297824	0	2.33133	1.36289	1.00658	0	0.0132877	0.655	-0.00128985	-0.000510148	-0.0009	2.875		-0.000227253	-0.000511609	0.0147221		5.39971e-24	4.79348e-24	40.5265	1.06103	1.31766		4.78056e-06	0.0139449	-0.0139449
0.2	15.85	0.016659	-0.07958	13.6652	0.2	3.14159		0.00862693	0.00248048	0.000713387	0.00020522	0.00877794	3.8082e-05	2.19652e-07	1.42365e-09	9.83682e-12	4.39784	-4.56785	2.02829	-0.297824	0	2.32758	1.36289	1.01905	0	0.0384305	0.655	-0.00368363	-0.00145691	-0.00257027	2.875		-0.000663778	-0.00146924	0.0425436		1.56142e-23	1.39197e-23	40.5265	1.06103	1.31766		1.38391e-05	0.0403686	-0.119949
0.2	31.15	0.032913	-0.197085	10.8904	0.2	3.14159		0.0170441	0.00490066	0.00140943	0.000405452	0.0176421	0.00015207	1.7378e-06	2.22907e-08	3.04635e-10	4.39784	-4.56785	2.02829	-0.297824	0	2.32197	1.36289	1.03819	0	0.0768959	0.655	-0.00723944	-0.00286326	-0.00505135	2.875		-0.00134729	-0.00291111	0.0850275		3.12465e-23	2.80228e-23	40.5265	1.06103	1.31766		2.77378e-05	0.0809113	-0.277996
0.2	45.55	0.048314	-0.323335	9.58242	0.2	3.14159		0.0250196	0.00719383	0.00206895	0.000595175	0.0263258	0.000334893	5.6329e-06	1.06233e-07	2.13348e-09	4.39784	-4.56785	2.02829	-0.297824	0	2.31665	1.36289	1.05684	0	0.114258	0.655	-0.0105861	-0.00418689	-0.00738649	2.875		-0.00202828	-0.00428898	0.126214		4.64523e-23	4.18833e-23	40.5265	1.06103	1.31766		4.12946e-05	0.120456	-0.443791
0.2	60.85	0.064723	-0.45833	8.69254	0.2	3.14159		0.0335171	0.00963709	0.00277163	0.000797315	0.035896	0.000615233	1.39025e-05	3.51848e-07	9.47703e-09	4.39784	-4.56785	2.02829	-0.297824	0	2.31099	1.36289	1.0773	0	0.155083	0.655	-0.0141419	-0.00559325	-0.00986757	2.875		-0.00279022	-0.00577416	0.171145		6.31112e-23	5.72084e-23	40.5265	1.06103	1.31766		5.61833e-05	0.163887	-0.622217
0.2	81.05	0.08634	-0.625	7.8964	0.2	3.14159		0.0447115	0.0128558	0.00369733	0.00106361	0.049029	0.00112949	3.41769e-05	1.15648e-06	4.16172e-08	4.39784	-4.56785	2.02829	-0.297824	0	2.30353	1.36289	1.10521	0	0.210531	0.655	-0.0188365	-0.00745	-0.0131432	2.875		-0.00385262	-0.00776615	0.232079		8.58439e-23	7.83208e-23	40.5265	1.06103	1.31766		7.65526e-05	0.223304	-0.848304
0.2	101.15	0.10764	-0.79125	7.33683	0.2	3.14159		0.0557418	0.0160273	0.00460946	0.00132601	0.0625858	0.00181098	6.85724e-05	2.89933e-06	1.30272e-07	4.39784	-4.56785	2.02829	-0.297824	0	2.29617	1.36289	1.13383	0	0.267108	0.655	-0.0235078	-0.00929757	-0.0164027	2.875		-0.00496632	-0.00977951	0.294178		1.09204e-22	1.0021e-22	40.5265	1.06103	1.31766		9.7535e-05	0.28451	-1.07576
0.2	130.25	0.13779	-1.01584	6.7571	0.2	3.14159		0.0713551	0.0205166	0.00590057	0.00169742	0.0828931	0.00310325	0.000151218	8.21097e-06	4.73298e-07	4.39784	-4.56785	2.02829	-0.297824	0	2.28576	1.36289	1.17634	0	0.35068	0.655	-0.0302708	-0.0119724	-0.0211216	2.875		-0.0066602	-0.0127394	0.385835		1.44092e-22	1.3317e-22	40.5265	1.06103	1.31766		0.000128941	0.376122	-1.39196
0.2	160.1	0.16746	-1.22417	6.33183	0.2	3.14159		0.0867198	0.0249344	0.00717113	0.00206292	0.104256	0.00479353	0.000285379	1.88926e-05	1.32635e-06	4.39784	-4.56785	2.02829	-0.297824	0	2.27552	1.36289	1.22063	0	0.437178	0.655	-0.0372082	-0.0147162	-0.0259622	2.875		-0.00846647	-0.0158135	0.480705		1.80778e-22	1.68051e-22	40.5265	1.06103	1.31766		0.000162025	0.472626	-1.6968
0.2	201	0.20545	-1.48209	5.91468	0.2	3.14159		0.106393	0.030591	0.00879797	0.00253092	0.133798	0.00765025	0.000562574	4.58812e-05	3.96286e-06	4.39784	-4.56785	2.02829	-0.297824	0	2.2624	1.36289	1.2812	0	0.554605	0.655	-0.0467136	-0.0184756	-0.0325946	2.875		-0.0109904	-0.0200527	0.609658		2.31687e-22	2.16608e-22	40.5265	1.06103	1.31766		0.000207974	0.606661	-2.08875
0.2	251.45	0.24752	-1.73291	5.55857	0.2	3.14159		0.128179	0.0368551	0.0105995	0.00304917	0.1697	0.0118675	0.00105937	0.000104571	1.09157e-05	4.39784	-4.56785	2.02829	-0.297824	0	2.24788	1.36289	1.35384	0	0.694223	0.655	-0.0584384	-0.0231129	-0.0407757	2.875		-0.0140761	-0.0252664	0.763462		2.94121e-22	2.76072e-22	40.5265	1.06103	1.31766		0.000264303	0.770972	-2.50389
0.2	301.35	0.28399	-1.93208	5.30964	0.2	3.14159		0.147065	0.0422854	0.0121613	0.00349844	0.203861	0.0165735	0.00170869	0.0001943	2.33345e-05	4.39784	-4.56785	2.02829	-0.297824	0	2.23529	1.36289	1.42204	0	0.824251	0.655	-0.0700355	-0.0276997	-0.0488676	2.875		-0.017011	-0.0303587	0.907388		3.54341e-22	3.33063e-22	40.5265	1.06103	1.31766		0.00031854	0.929181	-2.86127
0.2	351.6	0.31607	-2.08792	5.12356	0.2	3.14159		0.163678	0.047062	0.013535	0.00389363	0.236514	0.0216503	0.00249879	0.000317379	4.25254e-05	4.39784	-4.56785	2.02829	-0.297824	0	2.22421	1.36289	1.48646	0	0.946227	0.655	-0.0817139	-0.0323186	-0.0570162	2.875		-0.0198009	-0.0353952	1.04318		4.12817e-22	3.87874e-22	40.5265	1.06103	1.31766		0.000371068	1.08241	-3.17032
0.2	401.65	0.34407	-2.20458	4.98063	0.2	3.14159		0.178178	0.0512312	0.0147341	0.00423856	0.267211	0.0269001	0.00339709	0.000471184	6.88751e-05	4.39784	-4.56785	2.02829	-0.297824	0	2.21455	1.36289	1.5464	0	1.05903	0.655	-0.0933458	-0.0369191	-0.0651324	2.875		-0.0224007	-0.0403128	1.16953		4.68717e-22	4.39678e-22	40.5265	1.06103	1.31766		0.000421127	1.22843	-3.43301
0.2	450.7	0.36831	-2.29167	4.86887	0.2	3.14159		0.190731	0.0548404	0.0157721	0.00453717	0.295593	0.0321369	0.00436377	0.000649692	0.000101851	4.39784	-4.56785	2.02829	-0.297824	0	2.20618	1.36289	1.60131	0	1.16183	0.655	-0.104745	-0.0414277	-0.0730865	2.875		-0.024778	-0.045038	1.28543		5.21267e-22	4.87789e-22	40.5265	1.06103	1.31766		0.000468033	1.36525	-3.65692
0.2	501.3	0.39058	-2.35834	4.77452	0.2	3.14159		0.202263	0.0581564	0.0167258	0.00481151	0.323266	0.0375761	0.00543315	0.000860002	0.000143224	4.39784	-4.56785	2.02829	-0.297824	0	2.19849	1.36289	1.6544	0	1.26079	0.655	-0.116505	-0.0460788	-0.0812919	2.875		-0.0270677	-0.0498227	1.39771		5.73348e-22	5.34886e-22	40.5265	1.06103	1.31766		0.000514367	1.50041	-3.85874
0.2	551.65	0.41044	-2.40792	4.69624	0.2	3.14159		0.212548	0.0611135	0.0175762	0.00505616	0.34933	0.0429831	0.00655507	0.00109284	0.000191555	4.39784	-4.56785	2.02829	-0.297824	0	2.19163	1.36289	1.70402	0	1.35293	0.655	-0.128207	-0.0507069	-0.0894568	2.875		-0.0291956	-0.0545006	1.50293		6.23201e-22	5.79404e-22	40.5265	1.06103	1.31766		0.000558572	1.62935	-4.03727
0.2	598.8	0.42731	-2.44326	4.6336	0.2	3.14159		0.221284	0.0636254	0.0182987	0.00526398	0.372564	0.0480238	0.00764879	0.00133018	0.000243068	4.39784	-4.56785	2.02829	-0.297824	0	2.18581	1.36289	1.74797	0	1.43423	0.655	-0.139165	-0.0550409	-0.0971027	2.875		-0.0310673	-0.0588145	1.59636		6.68304e-22	6.1921e-22	40.5265	1.06103	1.31766		0.000598442	1.74566	-4.18892
0.2	800	0.48561		4.44021	0.2	3.14159		0.251475	0.0723061	0.0207952	0.00598218	0.46147	0.0690747	0.0126399	0.00251516	0.000524777	4.39784	-4.56785	2.02829	-0.297824	0	2.16568	1.36289	1.91375	0	1.73884	0.655	-0.185925	-0.0735349	-0.12973	2.875		-0.0379904	-0.0766351	1.95149		8.46837e-22	7.72489e-22	40.5265	1.06103	1.31766		0.000755145	2.20276
0.2	1000	0.52918		4.31485	0.2	3.14159		0.274038	0.0787936	0.022661	0.00651891	0.537905	0.089176	0.0179295	0.00390796	0.000891737	4.39784	-4.56785	2.02829	-0.297824	0	2.15064	1.36289	2.05359	0	1.99348	0.655	-0.232406	-0.0919186	-0.162162	2.875		-0.0436195	-0.0936577	2.25494		1.00791e-21	9.05337e-22	40.5265	1.06103	1.31766		0.000895101	2.61101
0.2	1200	0.56407		4.22398	0.2	3.14159		0.292106	0.0839886	0.0241551	0.00694872	0.606333	0.108557	0.0234204	0.00546416	0.00133294	4.39784	-4.56785	2.02829	-0.297824	0	2.1386	1.36289	2.17691	0	2.21656	0.655	-0.278887	-0.110302	-0.194595	2.875		-0.048401	-0.110212	2.52589		1.15789e-21	1.02498e-21	40.5265	1.06103	1.31766		0.00102436	2.98806
0.2	1400	0.5932		4.15368	0.2	3.14159		0.307191	0.088326	0.0254026	0.00730756	0.66906	0.127359	0.0290578	0.00715473	0.00184002	4.39784	-4.56785	2.02829	-0.297824	0	2.12854	1.36289	2.28854	0	2.41747	0.655	-0.325368	-0.128686	-0.227027	2.875		-0.0525749	-0.126431	2.77397		1.29991e-21	1.13516e-21	40.5265	1.06103	1.31766		0.00114595	3.34273
0.2	1600	0.61824		4.09682	0.2	3.14159		0.320158	0.0920544	0.0264748	0.00761603	0.727519	0.145701	0.0348135	0.00896112	0.00240703	4.39784	-4.56785	2.02829	-0.297824	0	2.11989	1.36289	2.39147	0	2.60191	0.655	-0.371849	-0.14707	-0.259459	2.875		-0.0562915	-0.142398	3.00508		1.43595e-21	1.23821e-21	40.5265	1.06103	1.31766		0.00126176	3.68057
0.2	1800	0.64024		4.04935	0.2	3.14159		0.331551	0.0953301	0.0274169	0.00788705	0.78269	0.163683	0.0406746	0.0108718	0.00302993	4.39784	-4.56785	2.02829	-0.297824	0	2.1123	1.36289	2.4877	0	2.77373	0.655	-0.41833	-0.165453	-0.291892	2.875		-0.0596541	-0.158169	3.22316		1.56735e-21	1.33574e-21	40.5265	1.06103	1.31766		0.00137311	4.00537
0.2	2000	0.65989		4.00875	0.2	3.14159		0.341727	0.098256	0.0282584	0.00812911	0.83525	0.181379	0.0466333	0.0128783	0.00370566	4.39784	-4.56785	2.02829	-0.297824	0	2.10552	1.36289	2.57859	0	2.93553	0.655	-0.464811	-0.183837	-0.324324	2.875		-0.0627341	-0.173784	3.43092		1.69506e-21	1.42887e-21	40.5265	1.06103	1.31766		0.00148089	4.31976
0.2	2200	0.67767		3.97338	0.2	3.14159		0.350934	0.100903	0.0290198	0.00834814	0.885691	0.19885	0.0526852	0.0149748	0.00443195	4.39784	-4.56785	2.02829	-0.297824	0	2.09938	1.36289	2.66516	0	3.08921	0.655	-0.511293	-0.202221	-0.356757	2.875		-0.0655835	-0.189272	3.63028		1.81975e-21	1.51841e-21	40.5265	1.06103	1.31766		0.00158576	4.62567
0.2	2400	0.69393		3.9421	0.2	3.14159		0.359354	0.103324	0.0297161	0.00854845	0.934392	0.216148	0.0588293	0.0171572	0.00520723	4.39784	-4.56785	2.02829	-0.297824	0	2.09376	1.36289	2.74815	0	3.23619	0.655	-0.557774	-0.220605	-0.389189	2.875		-0.0682429	-0.204655	3.82273		1.94195e-21	1.60499e-21	40.5265	1.06103	1.31766		0.00168824	4.92458
0.2	2600	0.70892		3.91412	0.2	3.14159		0.367117	0.105556	0.030358	0.00873311	0.981614	0.233302	0.0650612	0.0194212	0.00602976	4.39784	-4.56785	2.02829	-0.297824	0	2.08859	1.36289	2.82809	0	3.37747	0.655	-0.604255	-0.238988	-0.421622	2.875		-0.0707399	-0.219948	4.00931		2.06202e-21	1.68903e-21	40.5265	1.06103	1.31766		0.00178866	5.21751
0.2	2800	0.72285		3.88881	0.2	3.14159		0.374331	0.107631	0.0309545	0.00890471	1.02762	0.25036	0.0713856	0.0217662	0.00689923	4.39784	-4.56785	2.02829	-0.297824	0	2.08378	1.36289	2.90551	0	3.51402	0.655	-0.650736	-0.257372	-0.454054	2.875		-0.0731028	-0.235167	4.191		2.18034e-21	1.77099e-21	40.5265	1.06103	1.31766		0.00188739	5.50551
0.2	3000	0.73586		3.86576	0.2	3.14159		0.381068	0.109568	0.0315117	0.00906498	1.07255	0.267331	0.077796	0.0241877	0.00781396	4.39784	-4.56785	2.02829	-0.297824	0	2.07929	1.36289	2.98068	0	3.64637	0.655	-0.697217	-0.275756	-0.486486	2.875		-0.0753458	-0.25032	4.36836		2.29709e-21	1.85108e-21	40.5265	1.06103	1.31766		0.0019846	5.78909	-6.65212
0.1	5.4	0.0059112	0	19.5993	0.1	3.14159		0.00288896	0.000834098	0.000240854	6.95588e-05	0.00290574	4.20538e-06	8.10727e-09	1.75763e-11	4.04832e-14	4.41895	-4.56033	2.01547	-0.294167	0	2.33141	1.36289	1.00633	0	0.0128211	0.655	-0.00125499	-0.00049636	-0.000875676	2.875		-0.000219409	-0.000496842	0.0142149		5.2315e-24	4.63741e-24	40.5265	1.06103	1.31766		4.62987e-06	0.0135053	-0.0135053
0.1	15.7	0.017237	-0.07583	13.7186	0.1	3.14159		0.00842419	0.00243222	0.000702329	0.000202833	0.00856814	3.62934e-05	2.04402e-07	1.29362e-09	8.72788e-12	4.41895	-4.56033	2.01547	-0.294167	0	2.32772	1.36289	1.01864	0	0.0376971	0.655	-0.00364877	-0.00144312	-0.00254595	2.875		-0.000651203	-0.00145186	0.0417643		1.53841e-23	1.36899e-23	40.5265	1.06103	1.31766		1.36287e-05	0.0397549	-0.115585
0.1	31.3	0.034485	-0.185	10.8873	0.1	3.14159		0.0168538	0.004866	0.00140511	0.000405795	0.0174382	0.000148615	1.67925e-06	2.12982e-08	2.87812e-10	4.41895	-4.56033	2.01547	-0.294167	0	2.3221	1.36289	1.03783	0	0.0763843	0.655	-0.0072743	-0.00287705	-0.00507568	2.875		-0.00133797	-0.0029164	0.0845374		3.11899e-23	2.79113e-23	40.5265	1.06103	1.31766		2.76718e-05	0.0807186	-0.265719
0.1	45.7	0.050457	-0.295	9.59012	0.1	3.14159		0.0246597	0.00711972	0.00205589	0.000593742	0.0259278	0.000325007	5.38733e-06	1.00133e-07	1.98196e-09	4.41895	-4.56033	2.01547	-0.294167	0	2.31689	1.36289	1.05612	0	0.113102	0.655	-0.0106209	-0.00420068	-0.00741081	2.875		-0.00200588	-0.00428705	0.125065		4.62247e-23	4.15682e-23	40.5265	1.06103	1.31766		4.10636e-05	0.119782	-0.414782
0.1	61	0.067419	-0.40583	8.70704	0.1	3.14159		0.0329495	0.00951314	0.00274702	0.000793339	0.0352462	0.000593641	1.31849e-05	3.27998e-07	8.68436e-09	4.41895	-4.56033	2.01547	-0.294167	0	2.31137	1.36289	1.07609	0	0.153071	0.655	-0.0141767	-0.00560703	-0.00989189	2.875		-0.00274953	-0.00576212	0.16912		6.26441e-23	5.66083e-23	40.5265	1.06103	1.31766		5.57213e-05	0.162539	-0.568369
0.1	81.3	0.089795	-0.54667	7.91372	0.1	3.14159		0.0438852	0.0126705	0.00365874	0.00105664	0.0480386	0.00108562	3.22333e-05	1.07037e-06	3.78025e-08	4.41895	-4.56033	2.01547	-0.294167	0	2.30408	1.36289	1.10336	0	0.207394	0.655	-0.0188946	-0.00747298	-0.0131838	2.875		-0.00378586	-0.00774668	0.22892		8.50793e-23	7.7337e-23	40.5265	1.06103	1.31766		7.5796e-05	0.221097	-0.767767
0.1	101.1	0.11134	-0.68417	7.36627	0.1	3.14159		0.0544149	0.0157106	0.0045366	0.00131017	0.0609213	0.00171931	6.35228e-05	2.62118e-06	1.1495e-07	4.41895	-4.56033	2.01547	-0.294167	0	2.29706	1.36289	1.13063	0	0.261495	0.655	-0.0234962	-0.00929297	-0.0163946	2.875		-0.00484473	-0.00970889	0.288418		1.07591e-22	9.83042e-23	40.5265	1.06103	1.31766		9.5983e-05	0.279982	-0.964152
0.1	130.4	0.14243	-0.86667	6.78574	0.1	3.14159		0.0696094	0.0200975	0.00580337	0.00167602	0.0805546	0.00293842	0.0001396	7.39201e-06	4.15566e-07	4.41895	-4.56033	2.01547	-0.294167	0	2.28693	1.36289	1.17188	0	0.342846	0.655	-0.0303057	-0.0119862	-0.0211459	2.875		-0.00648184	-0.0126513	0.377833		1.41823e-22	1.30425e-22	40.5265	1.06103	1.31766		0.000126742	0.369705	-1.23638
0.1	160.2	0.17271	-1.04167	6.36344	0.1	3.14159		0.0844081	0.0243702	0.00703715	0.00203233	0.10095	0.00451063	0.000261171	1.6821e-05	1.14906e-06	4.41895	-4.56033	2.01547	-0.294167	0	2.27706	1.36289	1.21432	0	0.426043	0.655	-0.0372314	-0.0147254	-0.0259784	2.875		-0.00820456	-0.0156758	0.469297		1.77394e-22	1.63993e-22	40.5265	1.06103	1.31766		0.000158753	0.463083	-1.50475
0.1	200.3	0.21087	-1.24417	5.95378	0.1	3.14159		0.103058	0.0297548	0.00859199	0.00248137	0.128607	0.00710653	0.000505626	3.9916e-05	3.33797e-06	4.41895	-4.56033	2.01547	-0.294167	0	2.26463	1.36289	1.27128	0	0.536905	0.655	-0.0465509	-0.0184113	-0.0324811	2.875		-0.0105643	-0.0197687	0.59133		2.25803e-22	2.0981e-22	40.5265	1.06103	1.31766		0.000202354	0.590267	-1.83444
0.1	251.7	0.25497	-1.4525	5.58858	0.1	3.14159		0.124611	0.0359775	0.0103889	0.00300031	0.163574	0.0110931	0.000961483	9.21961e-05	9.35113e-06	4.41895	-4.56033	2.01547	-0.294167	0	2.25026	1.36289	1.34237	0	0.674146	0.655	-0.0584965	-0.0231359	-0.0408162	2.875		-0.0135662	-0.0250023	0.742865		2.87556e-22	2.68183e-22	40.5265	1.06103	1.31766		0.000257953	0.752449	-2.20495
0.1	301	0.29226	-1.60417	5.34	0.1	3.14159		0.142835	0.0412393	0.0119083	0.00343911	0.195947	0.0154263	0.00154239	0.00017019	1.98389e-05	4.41895	-4.56033	2.01547	-0.294167	0	2.23811	1.36289	1.40735	0	0.798591	0.655	-0.0699541	-0.0276675	-0.0488108	2.875		-0.016346	-0.0299671	0.880907		3.45484e-22	3.22623e-22	40.5265	1.06103	1.31766		0.000310026	0.904347	-2.50852
0.1	351.8	0.32606	-1.735	5.14871	0.1	3.14159		0.159354	0.0460086	0.0132855	0.00383684	0.227766	0.0202374	0.00227055	0.000280509	3.65689e-05	4.41895	-4.56033	2.01547	-0.294167	0	2.2271	1.36289	1.47049	0	0.918692	0.655	-0.0817603	-0.032337	-0.0570486	2.875		-0.0190656	-0.0350031	1.01486		4.03279e-22	3.76462e-22	40.5265	1.06103	1.31766		0.000361855	1.05553	-2.79053
0.1	402.9	0.35597	-1.82167	5.00027	0.1	3.14159		0.173972	0.0502291	0.0145042	0.0041888	0.258085	0.025293	0.00311411	0.000421351	6.00992e-05	4.41895	-4.56033	2.01547	-0.294167	0	2.21735	1.36289	1.53004	0	1.03127	0.655	-0.0936363	-0.037034	-0.0653351	2.875		-0.0216358	-0.0399774	1.14118		4.5925e-22	4.28042e-22	40.5265	1.06103	1.31766		0.000411902	1.20152	-3.02319
0.1	450.5	0.38074	-1.885	4.8894	0.1	3.14159		0.186078	0.0537242	0.0155134	0.00448028	0.284869	0.0301163	0.00398304	0.00057795	8.83321e-05	4.41895	-4.56033	2.01547	-0.294167	0	2.20928	1.36289	1.58216	0	1.12934	0.655	-0.104699	-0.0414093	-0.0730541	2.875		-0.023884	-0.0445305	1.25188		5.09478e-22	4.73815e-22	40.5265	1.06103	1.31766		0.000456679	1.33213	-3.21713
0.1	501.3	0.4044	-1.92917	4.79212	0.1	3.14159		0.197641	0.0570628	0.0164775	0.00475869	0.311983	0.0353201	0.00498202	0.000769785	0.000125181	4.41895	-4.56033	2.01547	-0.294167	0	2.20157	1.36289	1.63451	0	1.22738	0.655	-0.116505	-0.0460788	-0.0812919	2.875		-0.0261341	-0.0493072	1.36325		5.61128e-22	5.2034e-22	40.5265	1.06103	1.31766		0.000502583	1.46603	-3.3952
0.1	550.6	0.42508	-1.9625	4.71311	0.1	3.14159		0.207748	0.0599808	0.0173201	0.00500204	0.336997	0.0403913	0.00601036	0.000978353	0.000167492	4.41895	-4.56033	2.01547	-0.294167	0	2.19483	1.36289	1.68244	0	1.3168	0.655	-0.127963	-0.0506104	-0.0892865	2.875		-0.0281844	-0.0538692	1.46545		6.09507e-22	5.63412e-22	40.5265	1.06103	1.31766		0.000545447	1.59107	-3.55357
0.1	598.6	0.44339	-1.97333	4.64732	0.1	3.14159		0.216697	0.0625644	0.0180661	0.0052175	0.360234	0.0453236	0.00705742	0.00120066	0.0002147	4.41895	-4.56033	2.01547	-0.294167	0	2.18887	1.36289	1.72667	0	1.39904	0.655	-0.139118	-0.0550225	-0.0970703	2.875		-0.0300653	-0.0582472	1.56		6.55099e-22	6.03551e-22	40.5265	1.06103	1.31766		0.000585725	1.70856	-3.68189
0.1	800	0.50582		4.44767	0.1	3.14159		0.247208	0.0713736	0.0206099	0.00595213	0.448031	0.0657237	0.0118043	0.0023068	0.000472817	4.41895	-4.56033	2.01547	-0.294167	0	2.16853	1.36289	1.89144	0	1.70322	0.655	-0.185925	-0.0735349	-0.12973	2.875		-0.036944	-0.0760573	1.91469		8.3314e-22	7.56185e-22	40.5265	1.06103	1.31766		0.000741937	2.16423
0.1	1000	0.55263		4.31837	0.1	3.14159		0.270085	0.0779787	0.0225172	0.00650296	0.523828	0.085346	0.0168875	0.00362444	0.000814596	4.41895	-4.56033	2.01547	-0.294167	0	2.15328	1.36289	2.03099	0	1.95853	0.655	-0.232406	-0.0919186	-0.162162	2.875		-0.0425735	-0.0930802	2.21882		9.94218e-22	8.8904e-22	40.5265	1.06103	1.31766		0.000881899	2.5725
0.1	1200	0.59017		4.22479	0.1	3.14159		0.288432	0.0832758	0.0240467	0.00694471	0.591854	0.104354	0.0222004	0.00511001	0.00123013	4.41895	-4.56033	2.01547	-0.294167	0	2.14105	1.36289	2.15436	0	2.18273	0.655	-0.278887	-0.110302	-0.194595	2.875		-0.0473752	-0.109646	2.4909		1.14446e-21	1.009e-21	40.5265	1.06103	1.31766		0.00101141	2.95029
0.1	1400	0.62154		4.15249	0.1	3.14159		0.303763	0.0877022	0.0253249	0.00731385	0.654328	0.122859	0.0276831	0.00673477	0.00171172	4.41895	-4.56033	2.01547	-0.294167	0	2.13082	1.36289	2.26623	0	2.38498	0.655	-0.325368	-0.128686	-0.227027	2.875		-0.0515812	-0.125883	2.74037		1.2869e-21	1.11967e-21	40.5265	1.06103	1.31766		0.0011334	3.30614
0.1	1600	0.64851		4.09411	0.1	3.14159		0.316944	0.0915078	0.0264238	0.00763121	0.712616	0.140954	0.0333012	0.00847936	0.00225355	4.41895	-4.56033	2.01547	-0.294167	0	2.12204	1.36289	2.36949	0	2.57084	0.655	-0.371849	-0.14707	-0.259459	2.875		-0.0553352	-0.14187	2.97293		1.42343e-21	1.2233e-21	40.5265	1.06103	1.31766		0.00124969	3.64535
0.1	1800	0.6722		4.04543	0.1	3.14159		0.328522	0.0948506	0.0273891	0.00790998	0.767658	0.158721	0.0390372	0.0103313	0.00285156	4.41895	-4.56033	2.01547	-0.294167	0	2.11432	1.36289	2.46607	0	2.74406	0.655	-0.41833	-0.165453	-0.291892	2.875		-0.058737	-0.157663	3.19246		1.55535e-21	1.32145e-21	40.5265	1.06103	1.31766		0.00136154	3.9716
0.1	2000	0.69336		4.00386	0.1	3.14159		0.338864	0.0978364	0.0282513	0.00815897	0.820136	0.176236	0.044883	0.0122827	0.00350296	4.41895	-4.56033	2.01547	-0.294167	0	2.10742	1.36289	2.55737	0	2.90729	0.655	-0.464811	-0.183837	-0.324324	2.875		-0.0618591	-0.173301	3.40169		1.68361e-21	1.41524e-21	40.5265	1.06103	1.31766		0.00146985	4.28755
0.1	2200	0.71251		3.96766	0.1	3.14159		0.348223	0.100539	0.0290315	0.00838432	0.870542	0.193555	0.0508339	0.0143276	0.00420571	4.41895	-4.56033	2.01547	-0.294167	0	2.10118	1.36289	2.64439	0	3.06245	0.655	-0.511293	-0.202221	-0.356757	2.875		-0.0647542	-0.188814	3.60259		1.80889e-21	1.50549e-21	40.5265	1.06103	1.31766		0.00157529	4.59514
0.1	2400	0.73001		3.9357	0.1	3.14159		0.356776	0.103008	0.0297446	0.00859024	0.919206	0.21071	0.0568823	0.0164601	0.00495759	4.41895	-4.56033	2.01547	-0.294167	0	2.09548	1.36289	2.72781	0	3.21082	0.655	-0.557774	-0.220605	-0.389189	2.875		-0.0674573	-0.204221	3.79648		1.93166e-21	1.59275e-21	40.5265	1.06103	1.31766		0.00167832	4.89566
0.1	2600	0.74614		3.90713	0.1	3.14159		0.364659	0.105284	0.0304018	0.00878005	0.96641	0.227739	0.0630257	0.0186765	0.00575726	4.41895	-4.56033	2.01547	-0.294167	0	2.09023	1.36289	2.80819	0	3.35349	0.655	-0.604255	-0.238988	-0.421622	2.875		-0.0699988	-0.219539	3.98449		2.05232e-21	1.67749e-21	40.5265	1.06103	1.31766		0.0017793	5.19023
0.1	2800	0.76113		3.88131	0.1	3.14159		0.371985	0.107399	0.0310126	0.00895644	1.01243	0.24469	0.0692698	0.0209767	0.00660461	4.41895	-4.56033	2.01547	-0.294167	0	2.08534	1.36289	2.88607	0	3.49145	0.655	-0.650736	-0.257372	-0.454054	2.875		-0.072408	-0.234783	4.16765		2.17124e-21	1.76017e-21	40.5265	1.06103	1.31766		0.00187862	5.47993
0.1	3000	0.77513		3.8578	0.1	3.14159		0.378827	0.109375	0.031583	0.00912118	1.05739	0.26157	0.0756073	0.0233561	0.007498	4.41895	-4.56033	2.01547	-0.294167	0	2.08078	1.36289	2.96173	0	3.62522	0.655	-0.697217	-0.275756	-0.486486	2.875		-0.0746989	-0.249963	4.34649		2.28862e-21	1.841e-21	40.5265	1.06103	1.31766		0.00197644	5.76527	-5.754
[truncated: 14 more columns]

## Sheet: PHF calculation of CH4-CO2
Experimental data are from Le et al. 2020 and Fabre and Oksengorn 1993							All parameters and detailed calculation process can be found in the work of Ben-Amotz et al. 1993
CH4 mol%	Pressure	Density	Peak shift_CH4	CH4 mol%	P		xk (k=3)	xk (k=2)	xk (k=1)	xk (k=0)	I1	I2	I3	I4	I5	C1	C2	C3	C4	C5	C (BMCSL)	Sij	yij (sij) (contact)	slope (CH4 => =0)	ln yij (rij < aij) = ln yii(0)	a12	B11	B22	B12 (1/Å)	s12 (Å)		C12 (1/Å^3)	D12 (Å)	A12		FR (J/Å)	GR (J/Å^2)	k	f1(k)	f2(k)	Density	DnR/ n0	DnR	DnA		DnA (linear)	shift net (predict)		DnA (quadric)
1	5.57543	0.0036816	0	1	3.14159		0.00334346	0.000932624	0.000260146	7.25652e-05	0.00336594	5.6395e-06	1.25843e-08	3.15774e-11	8.45591e-14	4.2456	-4.61524	2.11892	-0.324521	0	2.3311	1.36289	1.0072	0	0.0142644	0.655	-0.00129576	-0.000512486	-0.000904124	2.875		-0.000242779	-0.000521951	0.0157217		5.61405e-24	5.04112e-24	40.5265	1.06103	1.31766	0.0036816	4.98529e-06	0.0145421	-0.0145421		-0.112506	-0.0979639		-0.120124
1	16.0829	0.010823	-0.17667	1	3.14159		0.00982894	0.00274168	0.000764766	0.000213324	0.0100254	4.95938e-05	3.26038e-07	2.40819e-09	1.89609e-11	4.2456	-4.61524	2.11892	-0.324521	0	2.32678	1.36289	1.02139	0	0.0423355	0.655	-0.00373776	-0.00147832	-0.00260804	2.875		-0.000731305	-0.00152273	0.0465741		1.65999e-23	1.50244e-23	40.5265	1.06103	1.31766	0.010823	1.47717e-05	0.043089	-0.219759		-0.33074	-0.287651		-0.352468
1	31.0936	0.0215	-0.47333	1	3.14159		0.0195253	0.00544638	0.00151921	0.00042377	0.0203133	0.000200918	2.63246e-06	3.87012e-08	6.06107e-10	4.2456	-4.61524	2.11892	-0.324521	0	2.32032	1.36289	1.04321	0	0.0853205	0.655	-0.00722633	-0.00285808	-0.00504221	2.875		-0.0015054	-0.0029945	0.093618		3.32914e-23	3.04735e-23	40.5265	1.06103	1.31766	0.0215	2.97141e-05	0.086676	-0.560006		-0.657018	-0.570343		-0.698199
1	45.5039	0.032286	-0.79167	1	3.14159		0.0293206	0.0081787	0.00228137	0.000636364	0.0311279	0.000465397	9.18694e-06	2.03222e-07	4.78571e-09	4.2456	-4.61524	2.11892	-0.324521	0	2.31379	1.36289	1.06601	0	0.130028	0.655	-0.0105754	-0.00418265	-0.00737901	2.875		-0.00234126	-0.00445859	0.142326		5.0529e-23	4.67495e-23	40.5265	1.06103	1.31766	0.032286	4.52293e-05	0.131934	-0.923604		-0.986628	-0.854694		-1.04546
1	61.8155	0.045121	-1.14333	1	3.14159		0.0409768	0.0114301	0.0031883	0.000889345	0.0445793	0.000938826	2.60019e-05	8.05744e-07	2.656e-08	4.2456	-4.61524	2.11892	-0.324521	0	2.30602	1.36289	1.09417	0	0.184988	0.655	-0.0143663	-0.00568199	-0.0100241	2.875		-0.00340771	-0.0061823	0.20195		7.16157e-23	6.70472e-23	40.5265	1.06103	1.31766	0.045121	6.431e-05	0.187592	-1.33092		-1.37885	-1.19126		-1.45608
1	81.5296	0.061443	-1.59333	1	3.14159		0.0557996	0.0155648	0.00434163	0.00121106	0.0626585	0.00181504	6.87987e-05	2.91195e-06	1.30976e-07	4.2456	-4.61524	2.11892	-0.324521	0	2.29613	1.36289	1.13171	0	0.257791	0.655	-0.0189479	-0.00749408	-0.013221	2.875		-0.00487916	-0.00836636	0.280595		9.94905e-23	9.44234e-23	40.5265	1.06103	1.31766	0.061443	8.96752e-05	0.261583	-1.85491		-1.87764	-1.61605		-1.97414
1	102.044	0.079156	-2.07167	1	3.14159		0.0718858	0.0200518	0.00559325	0.00156018	0.0836075	0.00315441	0.000154883	8.47342e-06	4.92094e-07	4.2456	-4.61524	2.11892	-0.324521	0	2.28541	1.36289	1.17477	0	0.340731	0.655	-0.0237157	-0.00937976	-0.0165477	2.875		-0.00662658	-0.0107585	0.369857		1.31327e-22	1.2628e-22	40.5265	1.06103	1.31766	0.079156	0.0001188	0.346538	-2.41821		-2.41893	-2.07239		-2.53114
1	131.965	0.10549	-2.77167	1	3.14159		0.0958011	0.0267227	0.00745404	0.00207923	0.117573	0.0060093	0.000396458	2.90498e-05	2.2559e-06	4.2456	-4.61524	2.11892	-0.324521	0	2.26947	1.36289	1.24366	0	0.472266	0.655	-0.0306695	-0.0121301	-0.0213998	2.875		-0.00952717	-0.0144418	0.511009		1.82369e-22	1.78227e-22	40.5265	1.06103	1.31766	0.10549	0.00016572	0.483406	-3.25508		-3.22367	-2.74026		-3.34924
1	161.587	0.13073	-3.41167	1	3.14159		0.118723	0.0331165	0.00923753	0.00257672	0.15368	0.00988928	0.000814974	7.4362e-05	7.17981e-06	4.2456	-4.61524	2.11892	-0.324521	0	2.25418	1.36289	1.31577	0	0.608527	0.655	-0.0375537	-0.0148528	-0.0262032	2.875		-0.0126661	-0.0182359	0.65709		2.36399e-22	2.3382e-22	40.5265	1.06103	1.31766	0.13073	0.000215546	0.628748	-4.04042		-3.99498	-3.36623		-4.1221
1	202.416	0.16183	-4.17	1	3.14159		0.146966	0.0409948	0.0114351	0.00318971	0.203674	0.016546	0.00170465	0.000193706	2.32472e-05	4.2456	-4.61524	2.11892	-0.324521	0	2.23536	1.36289	1.41387	0	0.791904	0.655	-0.0470426	-0.0186058	-0.0328242	2.875		-0.017051	-0.0234978	0.85407		3.11637e-22	3.11356e-22	40.5265	1.06103	1.31766	0.16183	0.000284961	0.831231	-5.00123		-4.94536	-4.11413		-5.05928
1	252.852	0.19296	-4.88	1	3.14159		0.175237	0.0488807	0.0136348	0.00380328	0.26081	0.0257689	0.0031972	0.00043586	6.26325e-05	4.2456	-4.61524	2.11892	-0.324521	0	2.21651	1.36289	1.52381	0	0.995	0.655	-0.0587642	-0.0232418	-0.041003	2.875		-0.0220526	-0.0297685	1.0735		3.99144e-22	4.00669e-22	40.5265	1.06103	1.31766	0.19296	0.000365469	1.06607	-5.94607		-5.89666	-4.83059		-5.98064
1	302.687	0.21694	-5.39167	1	3.14159		0.197015	0.0549553	0.0153292	0.00427594	0.310474	0.0350222	0.00492325	0.000758188	0.000122893	4.2456	-4.61524	2.11892	-0.324521	0	2.20199	1.36289	1.61769	0	1.1667	0.655	-0.0703462	-0.0278226	-0.0490844	2.875		-0.0263475	-0.0356072	1.26062		4.77138e-22	4.78835e-22	40.5265	1.06103	1.31766	0.21694	0.00043685	1.27429	-6.66596		-6.62947	-5.35518		-6.67898
1	352.122	0.23589	-5.78333	1	3.14159		0.214224	0.0597557	0.0166683	0.00464944	0.353708	0.0439173	0.00675442	0.00113538	0.000200633	4.2456	-4.61524	2.11892	-0.324521	0	2.19052	1.36289	1.69827	0	1.31296	0.655	-0.0818353	-0.0323666	-0.0571009	2.875		-0.0300224	-0.0410757	1.42151		5.46842e-22	5.47251e-22	40.5265	1.06103	1.31766	0.23589	0.000500268	1.45928	-7.24261		-7.20856	-5.74928		-7.2238
1	402.658	0.25177	-6.07667	1	3.14159		0.228646	0.0637784	0.0177904	0.00496244	0.392968	0.0526144	0.00868172	0.00156262	0.000295378	4.2456	-4.61524	2.11892	-0.324521	0	2.1809	1.36289	1.7706	0	1.44345	0.655	-0.0935801	-0.0370118	-0.065296	2.875		-0.0332957	-0.046399	1.56641		6.11768e-22	6.09657e-22	40.5265	1.06103	1.31766	0.25177	0.000558994	1.63059	-7.70726		-7.69384	-6.06325		-7.67559
1	451.793	0.26478	-6.30667	1	3.14159		0.240461	0.0670741	0.0187097	0.00521887	0.427392	0.0606908	0.010577	0.00200746	0.000399809	4.2456	-4.61524	2.11892	-0.324521	0	2.17303	1.36289	1.8334	0	1.55619	0.655	-0.104999	-0.0415282	-0.0732638	2.875		-0.036109	-0.0513709	1.69276		6.70063e-22	6.64582e-22	40.5265	1.06103	1.31766	0.26478	0.000611433	1.78355	-8.09022		-8.09141	-6.30786		-8.04248
1	461.1	0.26703	-6.345	1	3.14159		0.242504	0.0676441	0.0188686	0.00526322	0.433565	0.0621814	0.0109369	0.00209439	0.000420801	4.2456	-4.61524	2.11892	-0.324521	0	2.17166	1.36289	1.84461	0	1.57626	0.655	-0.107162	-0.0423837	-0.074773	2.875		-0.0366076	-0.0522937	1.71536		6.80656e-22	6.7445e-22	40.5265	1.06103	1.31766	0.26703	0.000620933	1.81126	-8.15626		-8.16017	-6.34891		-8.10564
1	502.43	0.27632	-6.495	1	3.14159		0.250941	0.0699974	0.0195251	0.00544633	0.459771	0.0686479	0.0125327	0.00248822	0.00051801	4.2456	-4.61524	2.11892	-0.324521	0	2.16604	1.36289	1.89198	0	1.66093	0.655	-0.116767	-0.0461826	-0.0814751	2.875		-0.0387021	-0.0563256	1.81116		7.26131e-22	7.16413e-22	40.5265	1.06103	1.31766	0.27632	0.00066161	1.92992	-8.42492		-8.44406	-6.51415		-8.36547
1	527.748	0.28153	-6.57833	1	3.14159		0.255672	0.0713172	0.0198932	0.00554902	0.474992	0.0725036	0.0135094	0.00273567	0.000580697	4.2456	-4.61524	2.11892	-0.324521	0	2.16289	1.36289	1.91936	0	1.70974	0.655	-0.122652	-0.0485098	-0.0855807	2.875		-0.0399027	-0.05875	1.86671		7.52909e-22	7.40834e-22	40.5265	1.06103	1.31766	0.28153	0.000685486	1.99956	-8.57789		-8.60328	-6.60371		-8.51054
1	549.563	0.28577	-6.64167	1	3.14159		0.259523	0.0723913	0.0201928	0.00563259	0.487668	0.0757689	0.0143506	0.00295237	0.000636523	4.2456	-4.61524	2.11892	-0.324521	0	2.16032	1.36289	1.94209	0	1.7502	0.655	-0.127722	-0.0505151	-0.0891183	2.875		-0.0408935	-0.0608149	1.91291		7.75411e-22	7.61196e-22	40.5265	1.06103	1.31766	0.28577	0.000705509	2.05797	-8.69964		-8.73285	-6.67488		-8.62825
1	557.569	0.28727	-6.67033	1	3.14159		0.260885	0.0727713	0.0202988	0.00566216	0.492216	0.0769523	0.0146585	0.00303249	0.000657371	4.2456	-4.61524	2.11892	-0.324521	0	2.15941	1.36289	1.95023	0	1.76467	0.655	-0.129582	-0.0512509	-0.0904166	2.875		-0.0412468	-0.0615669	1.92948		7.83534e-22	7.68508e-22	40.5265	1.06103	1.31766	0.28727	0.000712727	2.07902	-8.74935		-8.77868	-6.69966		-8.66982
1	600	0.29479	-6.80102	1	3.14159		0.267714	0.0746763	0.0208302	0.00581038	0.515529	0.0831145	0.0162874	0.00346309	0.000771206	4.2456	-4.61524	2.11892	-0.324521	0	2.15486	1.36289	1.99181	0	1.83853	0.655	-0.139443	-0.0551512	-0.0972973	2.875		-0.0430407	-0.0655095	2.01436		8.25555e-22	8.06035e-22	40.5265	1.06103	1.31766	0.29479	0.000749988	2.18772	-8.98874		-9.00849	-6.82077		-8.87764
1	800	0.3231		1	3.14159		0.293424	0.0818478	0.0228306	0.00636837	0.611603	0.110099	0.0238721	0.0055964	0.00137165	4.2456	-4.61524	2.11892	-0.324521	0	2.13772	1.36289	2.16098	0	2.13725	0.655	-0.185925	-0.0735349	-0.12973	2.875		-0.0501191	-0.0833324	2.36354		1.0056e-21	9.61465e-22	40.5265	1.06103	1.31766	0.3231	0.000908238	2.64933	-2.64933		-9.87361	-7.22428		-9.65124
1	1000	0.34415		1	3.14159		0.312541	0.0871801	0.024318	0.00678327	0.692645	0.134668	0.0313226	0.00785658	0.00205752	4.2456	-4.61524	2.11892	-0.324521	0	2.12497	1.36289	2.3012	0	2.38299	0.655	-0.232406	-0.0919186	-0.162162	2.875		-0.0556935	-0.100325	2.65802		1.16595e-21	1.09346e-21	40.5265	1.06103	1.31766	0.34415	0.0010475	3.05557	-3.05557		-10.5169	-7.46131		-10.2175
1	1200	0.361		1	3.14159		0.327843	0.0914486	0.0255087	0.00711539	0.764324	0.157627	0.0386781	0.0102135	0.00281289	4.2456	-4.61524	2.11892	-0.324521	0	2.11477	1.36289	2.42352	0	2.59617	0.655	-0.278887	-0.110302	-0.194595	2.875		-0.0603272	-0.116798	2.9189		1.314e-21	1.2108e-21	40.5265	1.06103	1.31766	0.361	0.0011749	3.42717	-3.42717		-11.0318	-7.60462		-10.6652
1	1400	0.37512		1	3.14159		0.340666	0.0950255	0.0265064	0.0073937	0.829622	0.179459	0.0459781	0.0126547	0.00362938	4.2456	-4.61524	2.11892	-0.324521	0	2.10622	1.36289	2.53367	0	2.78732	0.655	-0.325368	-0.128686	-0.227027	2.875		-0.0643172	-0.132915	3.15702		1.45361e-21	1.31811e-21	40.5265	1.06103	1.31766	0.37512	0.00129416	3.77508	-3.77508		-11.4633	-7.68821		-11.0367
1	1600	0.38732		1	3.14159		0.351746	0.098116	0.0273685	0.00763416	0.890276	0.200461	0.0532512	0.0151736	0.00450182	4.2456	-4.61524	2.11892	-0.324521	0	2.09884	1.36289	2.63499	0	2.96249	0.655	-0.371849	-0.14707	-0.259459	2.875		-0.0678373	-0.148773	3.37863		1.58708e-21	1.4181e-21	40.5265	1.06103	1.31766	0.38732	0.0014075	4.10568	-4.10568		-11.8361	-7.73044		-11.3548
1	1800	0.39809		1	3.14159		0.361527	0.100844	0.0281295	0.00784644	0.947375	0.220828	0.0605161	0.0177652	0.00542639	4.2456	-4.61524	2.11892	-0.324521	0	2.09232	1.36289	2.72954	0	3.12547	0.655	-0.41833	-0.165453	-0.291892	2.875		-0.0709963	-0.164432	3.58765		1.71582e-21	1.51246e-21	40.5265	1.06103	1.31766	0.39809	0.00151628	4.42298	-4.42298		-12.1652	-7.74225		-11.6335
1	2000	0.40775		1	3.14159		0.370299	0.103291	0.0288121	0.00803684	1.00165	0.24069	0.0677852	0.0204257	0.00640011	4.2456	-4.61524	2.11892	-0.324521	0	2.08647	1.36289	2.81872	0	3.27877	0.655	-0.464811	-0.183837	-0.324324	2.875		-0.0738677	-0.179932	3.78667		1.84079e-21	1.60234e-21	40.5265	1.06103	1.31766	0.40775	0.00162143	4.7297	-4.7297		-12.4604	-7.73073		-11.8818
1	2200	0.41653		1	3.14159		0.378273	0.105515	0.0294325	0.0082099	1.05368	0.260164	0.075075	0.0231546	0.00742171	4.2456	-4.61524	2.11892	-0.324521	0	2.08115	1.36289	2.90359	0	3.42433	0.655	-0.511293	-0.202221	-0.356757	2.875		-0.0765087	-0.195305	3.97768		1.96275e-21	1.68863e-21	40.5265	1.06103	1.31766	0.41653	0.00172366	5.02793	-5.02793		-12.7287	-7.70081		-12.1061
1	2400	0.4246		1	3.14159		0.385602	0.10756	0.0300027	0.00836896	1.1039	0.27935	0.0824035	0.025954	0.0084911	4.2456	-4.61524	2.11892	-0.324521	0	2.07627	1.36289	2.985	0	3.56366	0.655	-0.557774	-0.220605	-0.389189	2.875		-0.0789648	-0.210575	4.16226		2.08229e-21	1.77204e-21	40.5265	1.06103	1.31766	0.4246	0.00182357	5.31936	-5.31936		-12.9754	-7.65599		-12.3111
1	2600	0.43206		1	3.14159		0.392377	0.10945	0.0305299	0.008516	1.15252	0.298261	0.0897603	0.028816	0.00960455	4.2456	-4.61524	2.11892	-0.324521	0	2.07175	1.36289	3.06331	0	3.69743	0.655	-0.604255	-0.238988	-0.421622	2.875		-0.0812545	-0.225754	4.34109		2.19965e-21	1.85286e-21	40.5265	1.06103	1.31766	0.43206	0.00192138	5.60466	-5.60466		-13.2033	-7.59867		-12.4995
1	2800	0.43901		1	3.14159		0.398688	0.11121	0.0310209	0.00865298	1.1998	0.316963	0.0971583	0.0317424	0.0107622	4.2456	-4.61524	2.11892	-0.324521	0	2.06754	1.36289	3.13904	0	3.82658	0.655	-0.650736	-0.257372	-0.454054	2.875		-0.0834064	-0.240856	4.51514		2.31521e-21	1.93153e-21	40.5265	1.06103	1.31766	0.43901	0.00201744	5.88488	-5.88488		-13.4157	-7.53083		-12.6743
1	3000	0.44553		1	3.14159		0.404609	0.112862	0.0314817	0.00878149	1.246	0.335519	0.104612	0.0347364	0.0119648	4.2456	-4.61524	2.11892	-0.324521	0	2.06359	1.36289	3.21264	0	3.95189	0.655	-0.697217	-0.275756	-0.486486	2.875		-0.085445	-0.255896	4.68523		2.42928e-21	2.00843e-21	40.5265	1.06103	1.31766	0.44553	0.00211208	6.16093	-6.16093		-13.615	-7.45402		-12.8374
0.9	5.6	0.0043604	0	0.9	3.14159		0.00349346	0.000960689	0.00026453	7.2927e-05	0.00351801	6.15936e-06	1.43617e-08	3.76554e-11	1.05414e-13	4.17943	-4.6376	2.16031	-0.33696	0	2.331	1.36289	1.00747	0	0.0146748	0.655	-0.00130147	-0.000514744	-0.000908108	2.875		-0.0002488	-0.000526985	0.016144		5.7036e-24	5.14048e-24	40.5265	1.06103	1.31766	0.0043604	5.06975e-06	0.0147885	-0.0147885					-0.115396
0.9	15.5	0.012313	-0.175	0.9	3.14159		0.00986492	0.00271282	0.000746987	0.000205933	0.0100628	4.99624e-05	3.29667e-07	2.44393e-09	1.93126e-11	4.17943	-4.6376	2.16031	-0.33696	0	2.32676	1.36289	1.02131	0	0.0418258	0.655	-0.00360229	-0.00142474	-0.00251351	2.875		-0.00071966	-0.00147575	0.0459274		1.61928e-23	1.47114e-23	40.5265	1.06103	1.31766	0.012313	1.44239e-05	0.0420745	-0.217074					-0.325667
0.9	30.6	0.02507	-0.4875	0.9	3.14159		0.0200856	0.00552345	0.00152091	0.000419292	0.0209203	0.000212939	2.87056e-06	4.34174e-08	6.99534e-10	4.17943	-4.6376	2.16031	-0.33696	0	2.31994	1.36289	1.04416	0	0.0864535	0.655	-0.00711162	-0.00281271	-0.00496216	2.875		-0.0015215	-0.00296905	0.0946641		3.32865e-23	3.0613e-23	40.5265	1.06103	1.31766	0.02507	2.97473e-05	0.0867729	-0.574273					-0.662456
0.9	45	0.037973	-0.79667	0.9	3.14159		0.0304232	0.00836626	0.00230369	0.000635092	0.0323727	0.000502581	1.02978e-05	2.36414e-07	5.77758e-09	4.17943	-4.6376	2.16031	-0.33696	0	2.31305	1.36289	1.06809	0	0.132991	0.655	-0.0104583	-0.00413634	-0.0072973	2.875		-0.00239163	-0.00445135	0.145238		5.09681e-23	4.74204e-23	40.5265	1.06103	1.31766	0.037973	4.56914e-05	0.133282	-0.929952					-1.00245
0.9	60	0.052197	-1.14667	0.9	3.14159		0.0418191	0.0115001	0.00316661	0.000872986	0.0455769	0.000980125	2.77116e-05	8.7653e-07	2.94907e-08	4.17943	-4.6376	2.16031	-0.33696	0	2.30545	1.36289	1.0955	0	0.185999	0.655	-0.0139443	-0.00551512	-0.00972973	2.875		-0.00342102	-0.00606334	0.202591		7.09967e-23	6.68449e-23	40.5265	1.06103	1.31766	0.052197	6.38527e-05	0.186258	-1.33293					-1.37651
0.9	81	0.073396	-1.64333	0.9	3.14159		0.0588033	0.0161707	0.00445268	0.00122754	0.0664619	0.00203299	8.12912e-05	3.62816e-06	1.72047e-07	4.17943	-4.6376	2.16031	-0.33696	0	2.29413	1.36289	1.13845	0	0.268519	0.655	-0.0188249	-0.00744541	-0.0131351	2.875		-0.00509533	-0.00844888	0.291454		1.02089e-22	9.76719e-23	40.5265	1.06103	1.31766	0.073396	9.22213e-05	0.26901	-1.91234					-1.93253
0.9	101	0.094741	-2.15917	0.9	3.14159		0.0759045	0.0208735	0.00574761	0.00158453	0.0890708	0.00355816	0.000184727	1.068e-05	6.55287e-07	4.17943	-4.6376	2.16031	-0.33696	0	2.28273	1.36289	1.18442	0	0.35616	0.655	-0.023473	-0.00928378	-0.0163784	2.875		-0.00695653	-0.010868	0.385435		1.3519e-22	1.31185e-22	40.5265	1.06103	1.31766	0.094741	0.000122604	0.357637	-2.51681					-2.49062
0.9	131	0.12773	-2.8725	0.9	3.14159		0.102335	0.0281416	0.00774893	0.00213626	0.127491	0.00699196	0.000493859	3.87076e-05	3.21387e-06	4.17943	-4.6376	2.16031	-0.33696	0	2.26511	1.36289	1.2614	0	0.501467	0.655	-0.0304452	-0.0120413	-0.0212432	2.875		-0.0101977	-0.0147449	0.540759		1.90724e-22	1.88456e-22	40.5265	1.06103	1.31766	0.12773	0.000173851	0.507124	-3.37962					-3.34966
0.9	161	0.15975	-3.55	0.9	3.14159		0.127988	0.0351963	0.00969147	0.00267179	0.16937	0.0118252	0.00105396	0.000103878	1.08268e-05	4.17943	-4.6376	2.16031	-0.33696	0	2.24801	1.36289	1.34382	0	0.655272	0.655	-0.0374173	-0.0147989	-0.0261081	2.875		-0.0137965	-0.0188193	0.704982		2.5094e-22	2.513e-22	40.5265	1.06103	1.31766	0.15975	0.000229613	0.66978	-4.21978					-4.17943
0.9	202	0.1983	-4.31334	0.9	3.14159		0.158874	0.0436897	0.0120302	0.00331654	0.226805	0.0200845	0.00224622	0.000276637	3.59528e-05	4.17943	-4.6376	2.16031	-0.33696	0	2.22742	1.36289	1.45464	0	0.859531	0.655	-0.046946	-0.0185676	-0.0327568	2.875		-0.0187731	-0.0244197	0.923544		3.33996e-22	3.38093e-22	40.5265	1.06103	1.31766	0.1983	0.000306554	0.894217	-5.20756					-5.17311
0.9	252	0.23546	-4.985	0.9	3.14159		0.188646	0.0518768	0.0142845	0.00393803	0.290756	0.0312195	0.00418974	0.00061668	9.55889e-05	4.17943	-4.6376	2.16031	-0.33696	0	2.20757	1.36289	1.57537	0	1.07926	0.655	-0.0585662	-0.0231635	-0.0408649	2.875		-0.0242957	-0.0309478	1.1601		4.28132e-22	4.35425e-22	40.5265	1.06103	1.31766	0.23546	0.000393488	1.14781	-6.13281					-6.1255
0.9	302	0.26382	-5.46417	0.9	3.14159		0.211367	0.0581252	0.016005	0.00441235	0.346268	0.0423341	0.0064175	0.00106368	0.000185375	4.17943	-4.6376	2.16031	-0.33696	0	2.19242	1.36289	1.67818	0	1.26438	0.655	-0.0701865	-0.0277594	-0.048973	2.875		-0.0290261	-0.0370385	1.36116		5.119e-22	5.20415e-22	40.5265	1.06103	1.31766	0.26382	0.000470424	1.37223	-6.8364					-6.84873
0.9	351.5	0.28591	-5.84333	0.9	3.14159		0.229065	0.0629921	0.0173452	0.0047818	0.394154	0.0528859	0.00874385	0.00157684	0.000298632	4.17943	-4.6376	2.16031	-0.33696	0	2.18062	1.36289	1.76555	0	1.42044	0.655	-0.0816906	-0.0323094	-0.057	2.875		-0.0330359	-0.0426964	1.53224		5.86014e-22	5.94062e-22	40.5265	1.06103	1.31766	0.28591	0.00053809	1.56961	-7.41294					-7.4099
0.9	402	0.30424	-6.11417	0.9	3.14159		0.243751	0.0670305	0.0184572	0.00508836	0.437364	0.0631051	0.0111615	0.00214898	0.000434075	4.17943	-4.6376	2.16031	-0.33696	0	2.17083	1.36289	1.84341	0	1.55866	0.655	-0.0934271	-0.0369513	-0.0651892	2.875		-0.036585	-0.0481696	1.68519		6.54537e-22	6.60759e-22	40.5265	1.06103	1.31766	0.30424	0.000600287	1.75104	-7.86521					-7.87411
0.9	451.6	0.31934	-6.30417	0.9	3.14159		0.255849	0.0703574	0.0193732	0.00534091	0.475567	0.0726505	0.013547	0.00274528	0.000583155	4.17943	-4.6376	2.16031	-0.33696	0	2.16277	1.36289	1.91155	0	1.67901	0.655	-0.104954	-0.0415104	-0.0732324	2.875		-0.0396625	-0.0533197	1.81953		7.16493e-22	7.19905e-22	40.5265	1.06103	1.31766	0.31934	0.000656221	1.9142	-8.21837					-8.25554
0.9	502	0.33252	-6.5275	0.9	3.14159		0.266408	0.0732612	0.0201728	0.00556134	0.511002	0.0819056	0.0159646	0.00337686	0.000748179	4.17943	-4.6376	2.16031	-0.33696	0	2.15573	1.36289	1.9742	0	1.7892	0.655	-0.116668	-0.0461431	-0.0814054	2.875		-0.0424627	-0.0583723	1.94358		7.75168e-22	7.74909e-22	40.5265	1.06103	1.31766	0.33252	0.000708929	2.06795	-8.59545					-8.58774
0.9	600	0.35376	-6.79084	0.9	3.14159		0.283425	0.0779409	0.0214614	0.00591658	0.572595	0.0988468	0.0206257	0.00465973	0.00110137	4.17943	-4.6376	2.16031	-0.33696	0	2.14438	1.36289	2.0819	0	1.9777	0.655	-0.139443	-0.0551512	-0.0972973	2.875		-0.0471987	-0.0678055	2.15821		8.79982e-22	8.7082e-22	40.5265	1.06103	1.31766	0.35376	0.000802472	2.34081	-9.13165					-9.12168
0.9	800	0.38617		0.9	3.14159		0.309391	0.0850815	0.0234276	0.00645863	0.678672	0.130323	0.0299714	0.00743639	0.00192685	4.17943	-4.6376	2.16031	-0.33696	0	2.12707	1.36289	2.26421	0	2.29432	0.655	-0.185925	-0.0735349	-0.12973	2.875		-0.0549547	-0.0860026	2.52604		1.06889e-21	1.03681e-21	40.5265	1.06103	1.31766	0.38617	0.000969275	2.82738	-2.82738					-9.93303
0.9	1000	0.41029		0.9	3.14159		0.328716	0.0903956	0.0248909	0.00686203	0.768611	0.159034	0.03914	0.0103651	0.00286267	4.17943	-4.6376	2.16031	-0.33696	0	2.11419	1.36289	2.41596	0	2.55588	0.655	-0.232406	-0.0919186	-0.162162	2.875		-0.0611344	-0.103329	2.83703		1.23717e-21	1.17823e-21	40.5265	1.06103	1.31766	0.41029	0.00111618	3.2559	-3.2559					-10.5342
0.9	1200	0.42963		0.9	3.14159		0.344211	0.0946566	0.0260642	0.00718549	0.84858	0.185951	0.0482013	0.0134161	0.0038901	4.17943	-4.6376	2.16031	-0.33696	0	2.10386	1.36289	2.54895	0	2.78382	0.655	-0.278887	-0.110302	-0.194595	2.875		-0.0663361	-0.120116	3.11331		1.39265e-21	1.30442e-21	40.5265	1.06103	1.31766	0.42963	0.00125074	3.64842	-3.64842					-11.0146
0.9	1400	0.44585		0.9	3.14159		0.357206	0.0982302	0.0270482	0.00745677	0.921722	0.211608	0.0572029	0.0165745	0.00499845	4.17943	-4.6376	2.16031	-0.33696	0	2.0952	1.36289	2.66913	0	2.98891	0.655	-0.325368	-0.128686	-0.227027	2.875		-0.0708655	-0.136531	3.36597		1.53933e-21	1.42014e-21	40.5265	1.06103	1.31766	0.44585	0.00137682	4.01618	-4.01618					-11.4164
0.9	1600	0.45988		0.9	3.14159		0.368446	0.101321	0.0278993	0.00769142	0.989935	0.236362	0.0661866	0.0198352	0.006182	4.17943	-4.6376	2.16031	-0.33696	0	2.0877	1.36289	2.78007	0	3.17751	0.655	-0.371849	-0.14707	-0.259459	2.875		-0.0749074	-0.152678	3.6016		1.67962e-21	1.52826e-21	40.5265	1.06103	1.31766	0.45988	0.00149674	4.366	-4.366					-11.7631
0.9	1800	0.47227		0.9	3.14159		0.378373	0.104051	0.028651	0.00789864	1.05435	0.260417	0.0751708	0.0231908	0.00743542	4.17943	-4.6376	2.16031	-0.33696	0	2.08108	1.36289	2.88386	0	3.35343	0.655	-0.41833	-0.165453	-0.291892	2.875		-0.078572	-0.168615	3.82413		1.81498e-21	1.63049e-21	40.5265	1.06103	1.31766	0.47227	0.0016119	4.70192	-4.70192					-12.0686
0.9	2000	0.4834		0.9	3.14159		0.38729	0.106503	0.0293262	0.00808479	1.11582	0.283954	0.0841827	0.0266415	0.0087568	4.17943	-4.6376	2.16031	-0.33696	0	2.07514	1.36289	2.98211	0	3.51951	0.655	-0.464811	-0.183837	-0.324324	2.875		-0.0819436	-0.184391	4.03648		1.9465e-21	1.72817e-21	40.5265	1.06103	1.31766	0.4834	0.00172336	5.02705	-5.02705					-12.3425
0.9	2200	0.49352		0.9	3.14159		0.395398	0.108733	0.0299401	0.00825404	1.1749	0.307079	0.0932337	0.0301842	0.0101435	4.17943	-4.6376	2.16031	-0.33696	0	2.06973	1.36289	3.07583	0	3.67757	0.655	-0.511293	-0.202221	-0.356757	2.875		-0.085076	-0.200035	4.24055		2.0749e-21	1.82212e-21	40.5265	1.06103	1.31766	0.49352	0.0018318	5.34337	-5.34337					-12.5912
0.9	2400	0.50281		0.9	3.14159		0.402841	0.11078	0.0305037	0.00840942	1.23201	0.329871	0.102331	0.0338158	0.0115931	4.17943	-4.6376	2.16031	-0.33696	0	2.06477	1.36289	3.16579	0	3.82895	0.655	-0.557774	-0.220605	-0.389189	2.875		-0.0880087	-0.215569	4.43771		2.20067e-21	1.91295e-21	40.5265	1.06103	1.31766	0.50281	0.00193773	5.65235	-5.65235					-12.8192
0.9	2600	0.51142		0.9	3.14159		0.409739	0.112677	0.0310261	0.00855342	1.28753	0.352432	0.111498	0.0375406	0.0131067	4.17943	-4.6376	2.16031	-0.33696	0	2.06017	1.36289	3.2527	0	3.97493	0.655	-0.604255	-0.238988	-0.421622	2.875		-0.0907813	-0.231014	4.6293		2.32435e-21	2.00129e-21	40.5265	1.06103	1.31766	0.51142	0.00204163	5.95543	-5.95543					-13.0301
0.9	2800	0.51944		0.9	3.14159		0.416165	0.114444	0.0315126	0.00868755	1.34164	0.374776	0.120726	0.0413517	0.0146807	4.17943	-4.6376	2.16031	-0.33696	0	2.05589	1.36289	3.33689	0	4.11609	0.655	-0.650736	-0.257372	-0.454054	2.875		-0.0934097	-0.24638	4.8159		2.44615e-21	2.08739e-21	40.5265	1.06103	1.31766	0.51944	0.00214371	6.2532	-6.2532					-13.2263
0.9	3000	0.52696		0.9	3.14159		0.422189	0.1161	0.0319688	0.00881332	1.39458	0.39697	0.13003	0.045252	0.0163158	4.17943	-4.6376	2.16031	-0.33696	0	2.05187	1.36289	3.4188	0	4.25322	0.655	-0.697217	-0.275756	-0.486486	2.875		-0.0959187	-0.26168	4.99834		2.56638e-21	2.17162e-21	40.5265	1.06103	1.31766	0.52696	0.00224428	6.54657	-6.54657					-13.4101
0.8	5.57543	0.0050096	0	0.8	3.14159		0.00361532	0.000980864	0.000266704	7.267e-05	0.00364162	6.59869e-06	1.59234e-08	4.32075e-11	1.25188e-13	4.11755	-4.65628	2.19841	-0.348686	0	2.33092	1.36289	1.00767	0	0.0149638	0.655	-0.00129576	-0.000512485	-0.000904123	2.875		-0.000252764	-0.000527464	0.0164324		5.74475e-24	5.19669e-24	40.5265	1.06103	1.31766	0.0054	5.11132e-06	0.0149097	-0.0149097					-0.115268
0.8	15.3824	0.014134	-0.173333	0.8	3.14159		0.0102002	0.00276739	0.000752475	0.00020503	0.0104119	5.34645e-05	3.64806e-07	2.79653e-09	2.28512e-11	4.11755	-4.65628	2.19841	-0.348686	0	2.32653	1.36289	1.02189	0	0.0426232	0.655	-0.00357496	-0.00141393	-0.00249445	2.875		-0.000731199	-0.00147394	0.0467129		1.62924e-23	1.48647e-23	40.5265	1.06103	1.31766	0.01377	1.4529e-05	0.0423812	-0.215714					-0.324965
0.8	30.293	0.028819	-0.501667	0.8	3.14159		0.020798	0.00564267	0.00153428	0.000418053	0.0216941	0.000228758	3.19395e-06	5.00296e-08	8.34741e-10	4.11755	-4.65628	2.19841	-0.348686	0	2.31947	1.36289	1.04545	0	0.0882683	0.655	-0.00704028	-0.00278449	-0.00491238	2.875		-0.00155059	-0.00296375	0.0964465		3.35331e-23	3.09969e-23	40.5265	1.06103	1.31766	0.02852	3.00087e-05	0.0875352	-0.589202					-0.661783
0.8	44.8034	0.044125	-0.801667	0.8	3.14159		0.031844	0.00863954	0.00234915	0.000640084	0.0339851	0.000552784	1.18612e-05	2.85104e-07	7.29429e-09	4.11755	-4.65628	2.19841	-0.348686	0	2.3121	1.36289	1.07093	0	0.137387	0.655	-0.0104126	-0.00411826	-0.00726541	2.875		-0.00247046	-0.0044812	0.149682		5.19141e-23	4.86043e-23	40.5265	1.06103	1.31766	0.04434	4.66187e-05	0.135987	-0.937653					-1.01196
0.8	59.8141	0.061072	-1.15	0.8	3.14159		0.0440743	0.0119577	0.00325139	0.000885919	0.0482649	0.00109557	3.2671e-05	1.08963e-06	3.86492e-08	4.11755	-4.65628	2.19841	-0.348686	0	2.30395	1.36289	1.10031	0	0.193703	0.655	-0.0139011	-0.00549803	-0.00969958	2.875		-0.00356888	-0.00613205	0.210421		7.28509e-23	6.91067e-23	40.5265	1.06103	1.31766	0.06129	6.56549e-05	0.191515	-1.34152					-1.39863
0.8	70.3216	0.073621	-1.42333	0.8	3.14159		0.0531306	0.0144148	0.00391948	0.00106796	0.0593193	0.00163316	5.88903e-05	2.37205e-06	1.01551e-07	4.11755	-4.65628	2.19841	-0.348686	0	2.29791	1.36289	1.12289	0	0.236774	0.655	-0.0163431	-0.00646386	-0.0114035	2.875		-0.00443757	-0.00734276	0.256701		8.8813e-23	8.50133e-23	40.5265	1.06103	1.31766	0.07323	8.02399e-05	0.23406	-1.65739					-1.68423
0.8	80.8291	0.086715	-1.69333	0.8	3.14159		0.0625803	0.0169785	0.00461659	0.0012579	0.0713138	0.00232749	9.9172e-05	4.71417e-06	2.38028e-07	4.11755	-4.65628	2.19841	-0.348686	0	2.29161	1.36289	1.14725	0	0.283017	0.655	-0.0187851	-0.00742969	-0.0131074	2.875		-0.00539533	-0.00860264	0.306252		1.05941e-22	1.02307e-22	40.5265	1.06103	1.31766	0.08693	9.59491e-05	0.279883	-1.97322					-1.9816
0.8	90.636	0.099388	-1.96167	0.8	3.14159		0.0717261	0.0194599	0.00529128	0.00144174	0.0833924	0.00313897	0.000153774	8.39379e-06	4.86376e-07	4.11755	-4.65628	2.19841	-0.348686	0	2.28552	1.36289	1.17161	0	0.329091	0.655	-0.0210643	-0.00833114	-0.0146977	2.875		-0.00637334	-0.00982498	0.355509		1.23028e-22	1.19759e-22	40.5265	1.06103	1.31766	0.09987	0.000111673	0.325749	-2.28742					-2.26877
0.8	100.743	0.11284	-2.24667	0.8	3.14159		0.0814341	0.0220937	0.00600745	0.00163687	0.0967453	0.00416198	0.000232256	1.44227e-05	9.50124e-07	4.11755	-4.65628	2.19841	-0.348686	0	2.27904	1.36289	1.19838	0	0.379479	0.655	-0.0234133	-0.00926018	-0.0163367	2.875		-0.00746785	-0.0111325	0.409275		1.41771e-22	1.39094e-22	40.5265	1.06103	1.31766	0.11318	0.00012897	0.376206	-2.62287					-2.57291
0.8	115.254	0.13262	-2.67833	0.8	3.14159		0.0957089	0.0259666	0.00706051	0.0019238	0.117436	0.0059961	0.000395195	2.89288e-05	2.24432e-06	4.11755	-4.65628	2.19841	-0.348686	0	2.26953	1.36289	1.23951	0	0.456486	0.655	-0.0267856	-0.0105939	-0.0186898	2.875		-0.00918583	-0.0130907	0.491295		1.70599e-22	1.69137e-22	40.5265	1.06103	1.31766	0.13227	0.000155654	0.454043	-3.13238					-3.01887
0.8	130.364	0.15342	-2.97333	0.8	3.14159		0.11072	0.0300392	0.00816787	0.00222553	0.14065	0.00839408	0.000643337	5.46515e-05	4.91537e-06	4.11755	-4.65628	2.19841	-0.348686	0	2.25952	1.36289	1.2852	0	0.541442	0.655	-0.0302974	-0.0119829	-0.0211402	2.875		-0.0111376	-0.0152197	0.581655		2.0275e-22	2.02958e-22	40.5265	1.06103	1.31766	0.15292	0.000185496	0.541093	-3.51443					-3.48619
0.8	144.875	0.17311	-3.31	0.8	3.14159		0.12493	0.0338944	0.00921614	0.00251116	0.164117	0.0111609	0.000969943	9.32517e-05	9.48284e-06	4.11755	-4.65628	2.19841	-0.348686	0	2.25005	1.36289	1.33091	0	0.625891	0.655	-0.0336697	-0.0133167	-0.0234932	2.875		-0.013129	-0.0173288	0.671425		2.35157e-22	2.3726e-22	40.5265	1.06103	1.31766	0.17328	0.000215632	0.628997	-3.939					-3.92704
0.8	161.086	0.19421	-3.68833	0.8	3.14159		0.140157	0.0380257	0.0103395	0.00281724	0.191017	0.0147287	0.00144366	0.00015622	1.78619e-05	4.11755	-4.65628	2.19841	-0.348686	0	2.2399	1.36289	1.38276	0	0.721059	0.655	-0.0374374	-0.0148068	-0.0261221	2.875		-0.0154259	-0.019725	0.772618		2.72306e-22	2.76707e-22	40.5265	1.06103	1.31766	0.1941	0.000250209	0.729861	-4.41819					-4.3978
0.8	202.015	0.24083	-4.45667	0.8	3.14159		0.173802	0.0471538	0.0128215	0.00349351	0.257719	0.0252294	0.00310304	0.000419426	5.97644e-05	4.11755	-4.65628	2.19841	-0.348686	0	2.21747	1.36289	1.50904	0	0.95037	0.655	-0.0469495	-0.018569	-0.0327593	2.875		-0.0211433	-0.0257296	1.01705		3.65028e-22	3.75026e-22	40.5265	1.06103	1.31766	0.24082	0.000336477	0.981503	-5.43817					-5.43184
0.8	252.852	0.28483	-5.09	0.8	3.14159		0.205555	0.0557688	0.015164	0.00413178	0.331462	0.0392475	0.00577398	0.000929504	0.000157397	4.11755	-4.65628	2.19841	-0.348686	0	2.1963	1.36289	1.64533	0	1.19443	0.655	-0.0587642	-0.0232418	-0.041003	2.875		-0.027427	-0.0327361	1.27898		4.69492e-22	4.84406e-22	40.5265	1.06103	1.31766	0.28493	0.000433307	1.26396	-6.35396					-6.40009
0.8	301.186	0.31598	-5.53667	0.8	3.14159		0.228036	0.0618679	0.0168223	0.00458365	0.391248	0.0522217	0.00859203	0.00154214	0.000290702	4.11755	-4.65628	2.19841	-0.348686	0	2.18131	1.36289	1.75358	0	1.38617	0.655	-0.0699974	-0.0276846	-0.048841	2.875		-0.0324456	-0.0388701	1.48663		5.56304e-22	5.73509e-22	40.5265	1.06103	1.31766	0.31588	0.000513306	1.49731	-7.03398					-7.08105
0.8	351.422	0.34118	-5.90333	0.8	3.14159		0.246222	0.066802	0.018164	0.00494921	0.444969	0.0649682	0.0116179	0.00226081	0.000461472	4.11755	-4.65628	2.19841	-0.348686	0	2.16919	1.36289	1.84934	0	1.55442	0.655	-0.0816725	-0.0323022	-0.0569873	2.875		-0.0368743	-0.0448105	1.67052		6.36224e-22	6.53851e-22	40.5265	1.06103	1.31766	0.34099	0.000586514	1.71086	-7.61419					-7.6292
0.8	402.058	0.36168	-6.15167	0.8	3.14159		0.261016	0.0708158	0.0192553	0.00524658	0.492656	0.0770672	0.0146885	0.00304031	0.000659412	4.11755	-4.65628	2.19841	-0.348686	0	2.15932	1.36289	1.93325	0	1.70092	0.655	-0.0934406	-0.0369566	-0.0651986	2.875		-0.0407306	-0.0504627	1.83211		7.08827e-22	7.25364e-22	40.5265	1.06103	1.31766	0.36165	0.000652634	1.90373	-8.0554					-8.07331
0.8	451.693	0.37846	-6.30167	0.8	3.14159		0.273126	0.0741013	0.0201487	0.00548999	0.534631	0.0882802	0.0176845	0.00384091	0.000873393	4.11755	-4.65628	2.19841	-0.348686	0	2.15125	1.36289	2.00633	0	1.82785	0.655	-0.104976	-0.041519	-0.0732476	2.875		-0.0440606	-0.0557547	1.97333		7.74103e-22	7.88451e-22	40.5265	1.06103	1.31766	0.37855	0.000711767	2.07622	-8.37789					-8.43562
0.8	502.029	0.39306	-6.56	0.8	3.14159		0.283663	0.0769599	0.020926	0.00570178	0.573497	0.0991024	0.0206982	0.00468028	0.00110719	4.11755	-4.65628	2.19841	-0.348686	0	2.14422	1.36289	2.07338	0	1.94382	0.655	-0.116674	-0.0461458	-0.0814101	2.875		-0.0470875	-0.0609281	2.1034		8.35719e-22	8.46975e-22	40.5265	1.06103	1.31766	0.39305	0.000767316	2.23826	-8.79826					-8.74998
0.8	600.199	0.41667	-6.78167	0.8	3.14159		0.300701	0.0815827	0.0221829	0.00604427	0.641411	0.118955	0.0265032	0.00637814	0.00160393	4.11755	-4.65628	2.19841	-0.348686	0	2.13287	1.36289	2.18922	0	2.14319	0.655	-0.13949	-0.0551695	-0.0973296	2.875		-0.0522433	-0.0706049	2.32942		9.46101e-22	9.49464e-22	40.5265	1.06103	1.31766	0.41663	0.000866216	2.52675	-9.30842					-9.2566
0.8	800	0.45263		0.8	3.14159		0.326653	0.0886236	0.0240974	0.00656592	0.758514	0.155726	0.0380559	0.0100099	0.00274625	4.11755	-4.65628	2.19841	-0.348686	0	2.11556	1.36289	2.38541	0	2.47829	0.655	-0.185925	-0.0735349	-0.12973	2.875		-0.0607283	-0.0891907	2.71649		1.14447e-21	1.12676e-21	40.5265	1.06103	1.31766	0.45263	0.00104215	3.03996	-3.03996					-10.0241
0.8	1000	0.47948		0.8	3.14159		0.34603	0.0938807	0.0255269	0.00695541	0.858472	0.189365	0.0493795	0.0138227	0.00403045	4.11755	-4.65628	2.19841	-0.348686	0	2.10265	1.36289	2.54971	0	2.7568	0.655	-0.232406	-0.0919186	-0.162162	2.875		-0.0675744	-0.106885	3.04519		1.32147e-21	1.27857e-21	40.5265	1.06103	1.31766	0.47948	0.00119747	3.49302	-3.49302					-10.5939
0.8	1200	0.50106		0.8	3.14159		0.361604	0.098106	0.0266757	0.00726845	0.94784	0.220996	0.0605769	0.0177872	0.00543433	4.11755	-4.65628	2.19841	-0.348686	0	2.09226	1.36289	2.69442	0	3.00073	0.655	-0.278887	-0.110302	-0.194595	2.875		-0.0734052	-0.124019	3.33816		1.48518e-21	1.41456e-21	40.5265	1.06103	1.31766	0.50106	0.00133997	3.9087	-3.9087					-11.0499
0.8	1400	0.51919		0.8	3.14159		0.374688	0.101656	0.027641	0.00753144	1.02996	0.251234	0.0717129	0.0218887	0.00694514	4.11755	-4.65628	2.19841	-0.348686	0	2.08354	1.36289	2.82573	0	3.2211	0.655	-0.325368	-0.128686	-0.227027	2.875		-0.078538	-0.140768	3.60678		1.63976e-21	1.53968e-21	40.5265	1.06103	1.31766	0.51919	0.00147366	4.29868	-4.29868					-11.4315
0.8	1600	0.53489		0.8	3.14159		0.386018	0.10473	0.0284768	0.00775919	1.10683	0.280479	0.0828392	0.0261221	0.00855594	4.11755	-4.65628	2.19841	-0.348686	0	2.07599	1.36289	2.94735	0	3.42445	0.655	-0.371849	-0.14707	-0.259459	2.875		-0.0831638	-0.157237	3.85782		1.7877e-21	1.6569e-21	40.5265	1.06103	1.31766	0.53489	0.00160096	4.66999	-4.66999					-11.761
0.8	1800	0.54877		0.8	3.14159		0.396035	0.107447	0.0292158	0.00796054	1.17968	0.30897	0.093982	0.0304803	0.0102606	4.11755	-4.65628	2.19841	-0.348686	0	2.06931	1.36289	3.0615	0	3.61473	0.655	-0.41833	-0.165453	-0.291892	2.875		-0.0873986	-0.173489	4.09535		1.93052e-21	1.76802e-21	40.5265	1.06103	1.31766	0.54877	0.00172331	5.02691	-5.02691					-12.0515
0.8	2000	0.56125		0.8	3.14159		0.405042	0.109891	0.0298802	0.00814157	1.24944	0.336914	0.105176	0.0349649	0.0120574	4.11755	-4.65628	2.19841	-0.348686	0	2.06331	1.36289	3.16987	0	3.79489	0.655	-0.464811	-0.183837	-0.324324	2.875		-0.0913309	-0.189575	4.32242		2.06938e-21	1.87443e-21	40.5265	1.06103	1.31766	0.56125	0.00184185	5.37269	-5.37269					-12.3121
0.8	2200	0.57261		0.8	3.14159		0.41324	0.112115	0.030485	0.00830636	1.31672	0.364441	0.11644	0.0395743	0.0139436	4.11755	-4.65628	2.19841	-0.348686	0	2.05784	1.36289	3.27356	0	3.96688	0.655	-0.511293	-0.202221	-0.356757	2.875		-0.0950189	-0.205526	4.54104		2.20505e-21	1.97704e-21	40.5265	1.06103	1.31766	0.57261	0.00195731	5.70947	-5.70947					-12.5488
0.8	2400	0.58304		0.8	3.14159		0.420767	0.114157	0.0310403	0.00845766	1.38188	0.391618	0.127774	0.0443012	0.015915	4.11755	-4.65628	2.19841	-0.348686	0	2.05282	1.36289	3.37328	0	4.13193	0.655	-0.557774	-0.220605	-0.389189	2.875		-0.0984987	-0.221362	4.75249		2.33798e-21	2.07639e-21	40.5265	1.06103	1.31766	0.58304	0.00207014	6.03858	-6.03858					-12.7656
0.8	2600	0.59271		0.8	3.14159		0.427746	0.116051	0.0315551	0.00859794	1.4454	0.418568	0.139209	0.0491531	0.0179737	4.11755	-4.65628	2.19841	-0.348686	0	2.04817	1.36289	3.46983	0	4.29144	0.655	-0.604255	-0.238988	-0.421622	2.875		-0.101814	-0.237106	4.9582		2.46876e-21	2.17319e-21	40.5265	1.06103	1.31766	0.59271	0.00218088	6.36163	-6.36163					-12.9663
0.8	2800	0.60173		0.8	3.14159		0.434255	0.117817	0.0320353	0.00872878	1.50751	0.445339	0.150748	0.0541268	0.0201177	4.11755	-4.65628	2.19841	-0.348686	0	2.04383	1.36289	3.56364	0	4.44615	0.655	-0.650736	-0.257372	-0.454054	2.875		-0.104987	-0.252773	5.15897		2.59769e-21	2.26777e-21	40.5265	1.06103	1.31766	0.60173	0.00228984	6.67945	-6.67945					-13.1531
0.8	3000	0.61019		0.8	3.14159		0.440361	0.119473	0.0324857	0.0088515	1.56842	0.471975	0.162397	0.0592215	0.0223459	4.11755	-4.65628	2.19841	-0.348686	0	2.03976	1.36289	3.65509	0	4.59675	0.655	-0.697217	-0.275756	-0.486486	2.875		-0.108038	-0.268372	5.35549		2.72501e-21	2.36045e-21	40.5265	1.06103	1.31766	0.61019	0.00239725	6.99278	-6.99278					-13.3281
0.7	5.77557	0.0061695	0	0.7	3.14159		0.00405444	0.00108521	0.000291275	7.83898e-05	0.00408754	8.30879e-06	2.24887e-08	6.844e-11	2.22315e-13	4.05633	-4.67265	2.23549	-0.360365	0	2.33063	1.36289	1.00855	0	0.0165417	0.655	-0.00134228	-0.000530882	-0.000936579	2.875		-0.000281325	-0.00055716	0.0180848		6.20606e-24	5.68688e-24	40.5265	1.06103	1.31766	0.00617	5.54079e-06	0.0161625	-0.0161625					-0.116564
0.7	15.6826	0.016887	-0.16333	0.7	3.14159		0.0110977	0.00297041	0.000797271	0.000214567	0.0113487	6.34406e-05	4.71107e-07	3.92989e-09	3.49421e-11	4.05633	-4.67265	2.23549	-0.360365	0	2.32593	1.36289	1.02368	0	0.0457386	0.655	-0.00364473	-0.00144153	-0.00254313	2.875		-0.000787254	-0.00152578	0.049955		1.71573e-23	1.58058e-23	40.5265	1.06103	1.31766	0.01689	1.534e-05	0.0447468	-0.208077					-0.319219
0.7	30.6933	0.034078	-0.52	0.7	3.14159		0.0223952	0.0059943	0.00160889	0.000432996	0.023437	0.000266401	4.00732e-06	6.76124e-08	1.215e-09	4.05633	-4.67265	2.23549	-0.360365	0	2.3184	1.36289	1.04872	0	0.0938326	0.655	-0.00713331	-0.00282129	-0.0049773	2.875		-0.0016526	-0.00304793	0.10221		3.50433e-23	3.26767e-23	40.5265	1.06103	1.31766	0.03408	3.14342e-05	0.0916936	-0.611694					-0.644715
0.7	45.5039	0.052763	-0.79333	0.7	3.14159		0.0346745	0.00928098	0.00249105	0.000670408	0.0372257	0.000660573	1.54486e-05	4.04573e-07	1.12753e-08	4.05633	-4.67265	2.23549	-0.360365	0	2.31022	1.36289	1.07705	0	0.147948	0.655	-0.0105754	-0.00418265	-0.00737901	2.875		-0.0026748	-0.00464277	0.160621		5.48949e-23	5.19462e-23	40.5265	1.06103	1.31766	0.05276	4.94393e-05	0.144214	-0.937544					-0.999104
0.7	61.0149	0.073104	-1.20667	0.7	3.14159		0.0480421	0.0128589	0.00345139	0.000928861	0.0530564	0.00131629	4.28442e-05	1.55882e-06	6.0302e-08	4.05633	-4.67265	2.23549	-0.360365	0	2.30131	1.36289	1.1093	0	0.209159	0.655	-0.0141802	-0.00560841	-0.00989431	2.875		-0.00387473	-0.00638449	0.226476		7.73791e-23	7.41431e-23	40.5265	1.06103	1.31766	0.0731	6.99292e-05	0.203983	-1.41065					-1.38562
0.7	70.7219	0.087642	-1.42833	0.7	3.14159		0.0575961	0.0154162	0.00413776	0.00111358	0.0649275	0.00194369	7.60935e-05	3.32563e-06	1.54437e-07	4.05633	-4.67265	2.23549	-0.360365	0	2.29494	1.36289	1.1333	0	0.254454	0.655	-0.0164362	-0.00650065	-0.0114684	2.875		-0.0048031	-0.00757244	0.274877		9.37725e-23	9.07988e-23	40.5265	1.06103	1.31766	0.08764	8.49916e-05	0.247921	-1.67625					-1.66233
0.7	80.5288	0.10297	-1.69667	0.7	3.14159		0.0676693	0.0181124	0.00486143	0.00130834	0.0779762	0.00276144	0.000127451	6.55798e-06	3.58306e-07	4.05633	-4.67265	2.23549	-0.360365	0	2.28822	1.36289	1.1595	0	0.303677	0.655	-0.0187154	-0.0074021	-0.0130587	2.875		-0.00583861	-0.00882653	0.327347		1.11612e-22	1.09146e-22	40.5265	1.06103	1.31766	0.10297	0.000101441	0.295903	-1.99257					-1.95448
0.7	90.8362	0.11905	-1.915	0.7	3.14159		0.0782367	0.0209408	0.0056206	0.00151265	0.0922852	0.00380589	0.000203822	1.2152e-05	7.68759e-07	4.05633	-4.67265	2.23549	-0.360365	0	2.28118	1.36289	1.18802	0	0.357007	0.655	-0.0211109	-0.00834953	-0.0147302	2.875		-0.00698449	-0.0101764	0.384155		1.31115e-22	1.29327e-22	40.5265	1.06103	1.31766	0.11905	0.000119456	0.348452	-2.26345					-2.26143
0.7	101.043	0.13579	-2.23667	0.7	3.14159		0.0892378	0.0238854	0.00641093	0.00172535	0.107895	0.00511373	0.000313553	2.13717e-05	1.54451e-06	4.05633	-4.67265	2.23549	-0.360365	0	2.27384	1.36289	1.21891	0	0.414458	0.655	-0.0234831	-0.00928777	-0.0163854	2.875		-0.00825242	-0.0115866	0.445199		1.52172e-22	1.51386e-22	40.5265	1.06103	1.31766	0.13579	0.000138977	0.405395	-2.64207					-2.58147
0.7	116.955	0.16356	-2.625	0.7	3.14159		0.107488	0.0287701	0.00772201	0.0020782	0.135519	0.00783425	0.000582251	4.79855e-05	4.18791e-06	4.05633	-4.67265	2.23549	-0.360365	0	2.26167	1.36289	1.27299	0	0.514387	0.655	-0.027181	-0.0107503	-0.0189656	2.875		-0.0105338	-0.0139534	0.551073		1.88987e-22	1.90523e-22	40.5265	1.06103	1.31766	0.16356	0.000173255	0.505384	-3.13038					-3.1135
0.7	135.268	0.19515	-3.14667	0.7	3.14159		0.128248	0.0343268	0.00921344	0.00247958	0.169819	0.0118827	0.00106132	0.000104821	1.09477e-05	4.05633	-4.67265	2.23549	-0.360365	0	2.24783	1.36289	1.33922	0	0.635654	0.655	-0.031437	-0.0124336	-0.0219353	2.875		-0.0134007	-0.0168105	0.679452		2.34515e-22	2.39325e-22	40.5265	1.06103	1.31766	0.19515	0.000215751	0.629347	-3.77602					-3.72042
0.7	146.376	0.21398	-3.38	0.7	3.14159		0.140622	0.0376389	0.0101024	0.00271884	0.191869	0.0148483	0.00146046	0.000158578	1.81929e-05	4.05633	-4.67265	2.23549	-0.360365	0	2.23959	1.36289	1.3813	0	0.712111	0.655	-0.0340186	-0.0134547	-0.0237366	2.875		-0.0152595	-0.0186097	0.760359		2.63699e-22	2.70793e-22	40.5265	1.06103	1.31766	0.21398	0.00024304	0.708948	-4.08895					-4.08305
0.7	162.187	0.23991	-3.78167	0.7	3.14159		0.157663	0.0422	0.0113267	0.0030483	0.224393	0.0197027	0.00218579	0.000267074	3.44392e-05	4.05633	-4.67265	2.23549	-0.360365	0	2.22822	1.36289	1.44268	0	0.822938	0.655	-0.0376932	-0.014908	-0.0263006	2.875		-0.0180166	-0.0212321	0.877644		3.06698e-22	3.1732e-22	40.5265	1.06103	1.31766	0.23991	0.000283289	0.826354	-4.60802					-4.58345
0.7	201.915	0.29448	-4.52333	0.7	3.14159		0.193525	0.0517988	0.013903	0.00374167	0.302153	0.0333973	0.00460592	0.000696218	0.000110791	4.05633	-4.67265	2.23549	-0.360365	0	2.20432	1.36289	1.58653	0	1.07962	0.655	-0.0469263	-0.0185598	-0.032743	2.875		-0.0246124	-0.0276382	1.15018		4.10394e-22	4.29055e-22	40.5265	1.06103	1.31766	0.29448	0.000380231	1.10913	-5.63246					-5.64053
0.7	252.051	0.34383	-5.09667	0.7	3.14159		0.225957	0.0604795	0.0162329	0.00436871	0.385425	0.0508997	0.00829196	0.00147403	0.000275239	4.05633	-4.67265	2.23549	-0.360365	0	2.1827	1.36289	1.73662	0	1.34358	0.655	-0.0585781	-0.0231682	-0.0408731	2.875		-0.0316041	-0.034987	1.43265		5.2382e-22	5.49308e-22	40.5265	1.06103	1.31766	0.34383	0.000485756	1.41695	-6.51362					-6.60113
0.7	301.086	0.37877	-5.58167	0.7	3.14159		0.248918	0.0666254	0.0178825	0.00481266	0.453381	0.0670508	0.0121335	0.00238846	0.000493076	4.05633	-4.67265	2.23549	-0.360365	0	2.16739	1.36289	1.85648	0	1.55202	0.655	-0.0699741	-0.0276754	-0.0488248	2.875		-0.0372135	-0.0414958	1.65781		6.18669e-22	6.47773e-22	40.5265	1.06103	1.31766	0.37877	0.000573453	1.67276	-7.25443					-7.2839
0.7	351.722	0.40661	-5.86833	0.7	3.14159		0.267214	0.0715224	0.0191969	0.0051664	0.513791	0.0826497	0.0161631	0.00342983	0.000762312	4.05633	-4.67265	2.23549	-0.360365	0	2.15519	1.36289	1.96129	0	1.73281	0.655	-0.0817422	-0.0323298	-0.057036	2.875		-0.0421098	-0.0477224	1.85486		7.04887e-22	7.35492e-22	40.5265	1.06103	1.31766	0.40661	0.000652702	1.90393	-7.77226					-7.82951
0.7	402.158	0.4285	-6.13167	0.7	3.14159		0.2816	0.0753729	0.0202304	0.00544453	0.565706	0.0969005	0.0200759	0.00450439	0.00105748	4.05633	-4.67265	2.23549	-0.360365	0	2.1456	1.36289	2.05017	0	1.88517	0.655	-0.0934638	-0.0369658	-0.0652148	2.875		-0.0462276	-0.0535051	2.02256		7.80824e-22	8.11034e-22	40.5265	1.06103	1.31766	0.4285	0.000722054	2.10623	-8.2379					-8.25949
0.7	451.093	0.44644	-6.30167	0.7	3.14159		0.293389	0.0785285	0.0210774	0.00567248	0.611463	0.110058	0.02386	0.00559285	0.00137061	4.05633	-4.67265	2.23549	-0.360365	0	2.13774	1.36289	2.12767	0	2.01736	0.655	-0.104837	-0.0414638	-0.0731502	2.875		-0.0497964	-0.0588802	2.16916		8.4892e-22	8.77684e-22	40.5265	1.06103	1.31766	0.44644	0.00078396	2.28681	-8.58848					-8.61253
0.7	500.628	0.46218	-6.49833	0.7	3.14159		0.303733	0.0812972	0.0218205	0.00587247	0.6542	0.12282	0.0276712	0.00673116	0.00171062	4.05633	-4.67265	2.23549	-0.360365	0	2.13084	1.36289	2.19938	0	2.13919	0.655	-0.116349	-0.046017	-0.081183	2.875		-0.0530775	-0.0641382	2.3052		9.13513e-22	9.39986e-22	40.5265	1.06103	1.31766	0.46218	0.00084244	2.4574	-8.95573					-8.92276
0.7	600.099	0.48801	-6.75333	0.7	3.14159		0.320708	0.0858406	0.02304	0.00620067	0.730097	0.146527	0.0350783	0.00904597	0.00243421	4.05633	-4.67265	2.23549	-0.360365	0	2.11953	1.36289	2.32528	0	2.35201	0.655	-0.139466	-0.0551603	-0.0973134	2.875		-0.0587494	-0.0741906	2.54552		1.03122e-21	1.05081e-21	40.5265	1.06103	1.31766	0.48801	0.000948304	2.7662	-9.51953					-9.43282
0.7	800	0.52716		0.7	3.14159		0.346436	0.0927271	0.0248883	0.00669811	0.860697	0.190135	0.0496462	0.013915	0.00406241	4.05633	-4.67265	2.23549	-0.360365	0	2.10238	1.36289	2.53794	0	2.70881	0.655	-0.185925	-0.0735349	-0.12973	2.875		-0.0681102	-0.0932669	2.95531		1.2411e-21	1.24178e-21	40.5265	1.06103	1.31766	0.52716	0.00113533	3.31175	-3.31175					-10.2082
0.7	1000	0.55648		0.7	3.14159		0.365705	0.0978845	0.0262726	0.00707065	0.972851	0.230091	0.0638846	0.0189901	0.0058718	4.05633	-4.67265	2.23549	-0.360365	0	2.08953	1.36289	2.71702	0	3.00704	0.655	-0.232406	-0.0919186	-0.162162	2.875		-0.0757511	-0.1114	3.30462		1.4285e-21	1.40597e-21	40.5265	1.06103	1.31766	0.55648	0.00130068	3.79408	-3.79408					-10.7907
0.7	1200	0.58012		0.7	3.14159		0.38124	0.102043	0.0273887	0.00737102	1.07373	0.267779	0.0779668	0.0242528	0.00783877	4.05633	-4.67265	2.23549	-0.360365	0	2.07917	1.36289	2.87562	0	3.26972	0.655	-0.278887	-0.110302	-0.194595	2.875		-0.082336	-0.128951	3.61718		1.60208e-21	1.55371e-21	40.5265	1.06103	1.31766	0.58012	0.0014527	4.23753	-4.23753					-11.2615
0.7	1400	0.60002		0.7	3.14159		0.394318	0.105543	0.0283282	0.00762387	1.16685	0.3039	0.0919783	0.0296885	0.00994774	4.05633	-4.67265	2.23549	-0.360365	0	2.07045	1.36289	3.02014	0	3.50805	0.655	-0.325368	-0.128686	-0.227027	2.875		-0.0881918	-0.146099	3.90458		1.76612e-21	1.69009e-21	40.5265	1.06103	1.31766	0.60002	0.00159552	4.65413	-4.65413					-11.6586
0.7	1600	0.61729		0.7	3.14159		0.405668	0.108581	0.0291436	0.0078433	1.25445	0.338943	0.105999	0.0352984	0.0121925	4.05633	-4.67265	2.23549	-0.360365	0	2.06289	1.36289	3.15457	0	3.72894	0.655	-0.371849	-0.14707	-0.259459	2.875		-0.093524	-0.162957	4.17395		1.92331e-21	1.81832e-21	40.5265	1.06103	1.31766	0.61729	0.00173173	5.05145	-5.05145					-12.0038
0.7	1800	0.63258		0.7	3.14159		0.415716	0.11127	0.0298654	0.00803758	1.33778	0.373173	0.120059	0.0410742	0.0145653	4.05633	-4.67265	2.23549	-0.360365	0	2.05619	1.36289	3.2812	0	3.93638	0.655	-0.41833	-0.165453	-0.291892	2.875		-0.0984508	-0.179592	4.42942		2.07519e-21	1.94022e-21	40.5265	1.06103	1.31766	0.63258	0.00186282	5.43384	-5.43384					-12.3099
0.7	2000	0.64634		0.7	3.14159		0.424759	0.113691	0.0305151	0.00821241	1.41784	0.406818	0.134201	0.0470181	0.0170637	4.05633	-4.67265	2.23549	-0.360365	0	2.05016	1.36289	3.40176	0	4.13336	0.655	-0.464811	-0.183837	-0.324324	2.875		-0.103063	-0.196053	4.67407		2.22295e-21	2.05723e-21	40.5265	1.06103	1.31766	0.64634	0.00198994	5.80465	-5.80465					-12.5857
0.7	2200	0.65888		0.7	3.14159		0.433	0.115897	0.0311071	0.00837175	1.49531	0.440047	0.148454	0.0531318	0.0196862	4.05633	-4.67265	2.23549	-0.360365	0	2.04467	1.36289	3.51748	0	4.322	0.655	-0.511293	-0.202221	-0.356757	2.875		-0.107425	-0.212376	4.9101		2.36744e-21	2.17033e-21	40.5265	1.06103	1.31766	0.65888	0.0021139	6.16626	-6.16626					-12.8374
0.7	2400	0.67041		0.7	3.14159		0.440577	0.117925	0.0316515	0.00851825	1.57062	0.472947	0.162825	0.05941	0.0224289	4.05633	-4.67265	2.23549	-0.360365	0	2.03962	1.36289	3.62913	0	4.50365	0.655	-0.557774	-0.220605	-0.389189	2.875		-0.111577	-0.228583	5.1389		2.50918e-21	2.28017e-21	40.5265	1.06103	1.31766	0.67041	0.00223522	6.52013	-6.52013					-13.069
0.7	2600	0.6811		0.7	3.14159		0.447602	0.119805	0.0321562	0.00865407	1.64419	0.50562	0.177337	0.065855	0.0252914	4.05633	-4.67265	2.23549	-0.360365	0	2.03493	1.36289	3.73743	0	4.67951	0.655	-0.604255	-0.238988	-0.421622	2.875		-0.115557	-0.244695	5.36173		2.64866e-21	2.38732e-21	40.5265	1.06103	1.31766	0.6811	0.00235436	6.86765	-6.86765					-13.284
0.7	2800	0.69108		0.7	3.14159		0.454161	0.121561	0.0326273	0.00878088	1.71634	0.538151	0.192005	0.0724693	0.028274	4.05633	-4.67265	2.23549	-0.360365	0	2.03056	1.36289	3.84293	0	4.85056	0.655	-0.650736	-0.257372	-0.454054	2.875		-0.119394	-0.260728	5.57957		2.78628e-21	2.49225e-21	40.5265	1.06103	1.31766	0.69108	0.00247169	7.20993	-7.20993					-13.4849
0.7	3000	0.70045		0.7	3.14159		0.460318	0.123209	0.0330697	0.00889994	1.7873	0.570599	0.206843	0.0792543	0.0313767	4.05633	-4.67265	2.23549	-0.360365	0	2.02645	1.36289	3.94607	0	5.01751	0.655	-0.697217	-0.275756	-0.486486	2.875		-0.123112	-0.276695	5.79319		2.92232e-21	2.59531e-21	40.5265	1.06103	1.31766	0.70045	0.00258752	7.54779	-7.54779					-13.6736
0.6	5.47535	0.0062101	0	0.6	3.14159		0.00382843	0.0010144	0.000269582	7.18535e-05	0.00385793	7.40378e-06	1.89207e-08	5.4369e-11	1.66554e-13	4.01113	-4.68338	2.26247	-0.369038	0	2.33078	1.36289	1.00803	0	0.01544	0.655	-0.0012725	-0.000503286	-0.000887895	2.875		-0.000259415	-0.000524175	0.0168948		5.78808e-24	5.27774e-24	40.5265	1.06103	1.31766	0.00678	5.1608e-06	0.0150541	-0.0150541					-0.103372
0.6	15.9828	0.018624	-0.19	0.6	3.14159		0.0114814	0.00304217	0.000808473	0.000215488	0.0117502	6.79735e-05	5.22285e-07	4.50779e-09	4.14681e-11	4.01113	-4.68338	2.26247	-0.369038	0	2.32568	1.36289	1.02439	0	0.0468143	0.655	-0.0037145	-0.00146912	-0.00259181	2.875		-0.000800587	-0.00155403	0.0511095		1.7463e-23	1.60813e-23	40.5265	1.06103	1.31766	0.01741	1.56117e-05	0.0455394	-0.235539					-0.31034
0.6	30.4932	0.037116	-0.5	0.6	3.14159		0.0228814	0.00606279	0.00161122	0.000429448	0.0239699	0.000278464	4.28041e-06	7.37951e-08	1.35498e-09	4.01113	-4.68338	2.26247	-0.369038	0	2.31808	1.36289	1.04955	0	0.0948518	0.655	-0.00708679	-0.00280289	-0.00494484	2.875		-0.00166495	-0.00304082	0.103201		3.51175e-23	3.28239e-23	40.5265	1.06103	1.31766	0.03645	3.15211e-05	0.0919472	-0.591947					-0.619455
0.6	45.9042	0.058735	-0.82	0.6	3.14159		0.0362092	0.00959419	0.0025497	0.000679589	0.0389987	0.000723411	1.76761e-05	4.83546e-07	1.40756e-08	4.01113	-4.68338	2.26247	-0.369038	0	2.30919	1.36289	1.08024	0	0.153081	0.655	-0.0106684	-0.00421945	-0.00744392	2.875		-0.00276528	-0.00472058	0.16594		5.62542e-23	5.34464e-23	40.5265	1.06103	1.31766	0.05741	5.07193e-05	0.147948	-0.967948					-0.982073
0.6	60.7147	0.081738	-1.17833	0.6	3.14159		0.0503901	0.0133517	0.00354827	0.000945744	0.0559297	0.0014577	4.98058e-05	1.90159e-06	7.71819e-08	4.01113	-4.68338	2.26247	-0.369038	0	2.29974	1.36289	1.11449	0	0.217626	0.655	-0.0141104	-0.00558081	-0.00984563	2.875		-0.00404485	-0.00645754	0.235071		7.94747e-23	7.67259e-23	40.5265	1.06103	1.31766	0.0806	7.1973e-05	0.209945	-1.38828					-1.36936
0.6	70.2215	0.097781	-1.40167	0.6	3.14159		0.0602804	0.0159722	0.0042447	0.00113137	0.0683501	0.00214542	8.79857e-05	4.02681e-06	1.95787e-07	4.01113	-4.68338	2.26247	-0.369038	0	2.29315	1.36289	1.13941	0	0.264311	0.655	-0.0163199	-0.00645466	-0.0113873	2.875		-0.00500537	-0.00764932	0.284854		9.62015e-23	9.38374e-23	40.5265	1.06103	1.31766	0.09743	8.73724e-05	0.254865	-1.65654					-1.64036
0.6	81.1293	0.11749	-1.665	0.6	3.14159		0.0724307	0.0191916	0.00510027	0.00135941	0.0843428	0.00320746	0.000158711	8.74967e-06	5.12028e-07	4.01113	-4.68338	2.26247	-0.369038	0	2.28505	1.36289	1.17125	0	0.323644	0.655	-0.0188549	-0.00745729	-0.0131561	2.875		-0.00626422	-0.00910332	0.34792		1.17446e-22	1.15913e-22	40.5265	1.06103	1.31766	0.1173	0.00010702	0.312177	-1.97718					-1.97428
0.6	90.0356	0.1346	-1.93333	0.6	3.14159		0.0829787	0.0219865	0.00584302	0.00155738	0.0989221	0.00434094	0.000246968	1.56322e-05	1.04956e-06	4.01113	-4.68338	2.26247	-0.369038	0	2.27801	1.36289	1.20004	0	0.377012	0.655	-0.0209248	-0.00827595	-0.0146004	2.875		-0.00742955	-0.0103664	0.40449		1.36591e-22	1.3608e-22	40.5265	1.06103	1.31766	0.13658	0.000124798	0.364035	-2.29736					-2.26507
0.6	100.543	0.15587	-2.24167	0.6	3.14159		0.0960913	0.0254609	0.00676636	0.00180348	0.118008	0.00605099	0.000400459	2.94336e-05	2.29273e-06	4.01113	-4.68338	2.26247	-0.369038	0	2.26927	1.36289	1.23742	0	0.445901	0.655	-0.0233668	-0.00924178	-0.0163043	2.875		-0.00897551	-0.0119511	0.477349		1.61418e-22	1.62539e-22	40.5265	1.06103	1.31766	0.15691	0.000147931	0.431516	-2.67319					-2.62771
0.6	116.254	0.1895	-2.71	0.6	3.14159		0.116824	0.0309543	0.00822625	0.0021926	0.150545	0.00952005	0.000771488	6.92401e-05	6.57655e-06	4.01113	-4.68338	2.26247	-0.369038	0	2.25545	1.36289	1.30036	0	0.560991	0.655	-0.0270182	-0.0106859	-0.018852	2.875		-0.0116519	-0.014522	0.598784		2.03316e-22	2.07785e-22	40.5265	1.06103	1.31766	0.18669	0.000187126	0.545847	-3.25585					-3.2037
0.6	131.365	0.22218	-3.12667	0.6	3.14159		0.13697	0.0362924	0.00964489	0.00257072	0.18523	0.0139268	0.00133254	0.000140821	1.57278e-05	4.01113	-4.68338	2.26247	-0.369038	0	2.24202	1.36289	1.36647	0	0.680719	0.655	-0.03053	-0.0120749	-0.0213024	2.875		-0.01454	-0.0171681	0.724969		2.47723e-22	2.56195e-22	40.5265	1.06103	1.31766	0.21917	0.000228787	0.667373	-3.79404					-3.76651
0.6	146.176	0.25306	-3.49167	0.6	3.14159		0.156007	0.0413366	0.0109854	0.00292801	0.221117	0.019189	0.00210522	0.000254437	3.24572e-05	4.01113	-4.68338	2.26247	-0.369038	0	2.22933	1.36289	1.43388	0	0.80173	0.655	-0.0339721	-0.0134363	-0.0237042	2.875		-0.0175506	-0.0198609	0.85251		2.93602e-22	3.06446e-22	40.5265	1.06103	1.31766	0.25064	0.000271891	0.793107	-4.28478					-4.3011
0.6	162.087	0.28355	-3.84667	0.6	3.14159		0.174804	0.046317	0.012309	0.00328079	0.259875	0.0256052	0.00316855	0.000430846	6.17549e-05	4.01113	-4.68338	2.26247	-0.369038	0	2.2168	1.36289	1.50566	0	0.929484	0.655	-0.0376699	-0.0148988	-0.0262844	2.875		-0.020813	-0.0227693	0.987311		3.43259e-22	3.60868e-22	40.5265	1.06103	1.31766	0.28155	0.000318552	0.929217	-4.77589					-4.83159
0.6	201.715	0.34449	-4.59	0.6	3.14159		0.212372	0.0562714	0.0149544	0.0039859	0.348874	0.0428862	0.00653448	0.00108846	0.000190626	4.01113	-4.68338	2.26247	-0.369038	0	2.19175	1.36289	1.66689	0	1.21291	0.655	-0.0468798	-0.0185414	-0.0327106	2.875		-0.0282884	-0.0296542	1.28756		4.58424e-22	4.86285e-22	40.5265	1.06103	1.31766	0.34488	0.000426562	1.24428	-5.83428					-5.8998
0.6	251.751	0.39755	-5.18833	0.6	3.14159		0.245083	0.0649386	0.0172578	0.00459982	0.441452	0.0641042	0.0114057	0.00220867	0.000448664	4.01113	-4.68338	2.26247	-0.369038	0	2.16994	1.36289	1.83005	0	1.49549	0.655	-0.0585083	-0.0231406	-0.0408245	2.875		-0.0359659	-0.0373746	1.58939		5.80782e-22	6.17199e-22	40.5265	1.06103	1.31766	0.39859	0.000540708	1.57725	-6.76558					-6.83846
0.6	301.586	0.43468	-5.55667	0.6	3.14159		0.267973	0.0710037	0.0188696	0.00502943	0.516429	0.0833557	0.016352	0.00348039	0.00077584	4.01113	-4.68338	2.26247	-0.369038	0	2.15468	1.36289	1.95927	0	1.71679	0.655	-0.0700904	-0.0277214	-0.0489059	2.875		-0.0420636	-0.0442089	1.82814		6.82375e-22	7.23456e-22	40.5265	1.06103	1.31766	0.4343	0.000634846	1.85184	-7.40851					-7.50008
0.6	352.723	0.46358	-5.86667	0.6	3.14159		0.28579	0.0757244	0.0201241	0.00536382	0.581622	0.101416	0.0213569	0.00486784	0.0011606	4.01113	-4.68338	2.26247	-0.369038	0	2.14281	1.36289	2.06976	0	1.90452	0.655	-0.0819748	-0.0324218	-0.0571983	2.875		-0.0472603	-0.0506361	2.03257		7.72742e-22	8.15967e-22	40.5265	1.06103	1.31766	0.46273	0.000718058	2.09458	-7.96125					-8.01775
0.6	402.358	0.48613	-6.09224	0.6	3.14159		0.299691	0.0794079	0.021103	0.00562473	0.637199	0.117691	0.0261235	0.00626418	0.00156972	4.01113	-4.68338	2.26247	-0.369038	0	2.13354	1.36289	2.16271	0	2.06149	0.655	-0.0935104	-0.0369842	-0.0652473	2.875		-0.0516072	-0.0564896	2.20497		8.51329e-22	8.94898e-22	40.5265	1.06103	1.31766	0.48596	0.000790026	2.30451	-8.39675					-8.42332
0.6	451.994	0.50497	-6.25987	0.6	3.14159		0.311306	0.0824853	0.0219209	0.00584272	0.687135	0.132949	0.0307865	0.00768936	0.00200536	4.01113	-4.68338	2.26247	-0.369038	0	2.1258	1.36289	2.24533	0	2.20035	0.655	-0.105046	-0.0415466	-0.0732963	2.875		-0.0554429	-0.0620608	2.35869		9.23225e-22	9.65864e-22	40.5265	1.06103	1.31766	0.50497	0.000855542	2.49562	-8.75549					-8.76328
0.6	503.73	0.52183	-6.44039	0.6	3.14159		0.3217	0.0852394	0.0226528	0.0060378	0.734769	0.148028	0.0355602	0.00920077	0.00248394	4.01113	-4.68338	2.26247	-0.369038	0	2.11887	1.36289	2.32339	0	2.33104	0.655	-0.11707	-0.0463022	-0.081686	2.875		-0.05904	-0.0676465	2.50441		9.92916e-22	1.03359e-21	40.5265	1.06103	1.31766	0.52131	0.000918771	2.68005	-9.12044					-9.06836
0.6	599.999	0.54799	-6.64884	0.6	3.14159		0.337827	0.0895125	0.0237884	0.00634048	0.814726	0.174405	0.0442636	0.0120731	0.00343206	4.01113	-4.68338	2.26247	-0.369038	0	2.10812	1.36289	2.45292	0	2.54686	0.655	-0.139443	-0.0551511	-0.0972971	2.875		-0.0649442	-0.0776043	2.74731		1.11226e-21	1.14731e-21	40.5265	1.06103	1.31766	0.54799	0.00102646	2.99419	-9.64303					-9.54333
0.6	800	0.58906		0.6	3.14159		0.363146	0.0962212	0.0255713	0.00681568	0.957169	0.224376	0.061802	0.0182312	0.0055952	4.01113	-4.68338	2.26247	-0.369038	0	2.09124	1.36289	2.67945	0	2.92159	0.655	-0.185925	-0.0735349	-0.12973	2.875		-0.0750531	-0.0971007	3.1759		1.33198e-21	1.34996e-21	40.5265	1.06103	1.31766	0.58906	0.00122296	3.56739	-3.56739					-10.2929
0.6	1000	0.61997		0.6	3.14159		0.382201	0.10127	0.0269131	0.00717332	1.0803	0.270289	0.0789251	0.0246186	0.00797841	4.01113	-4.68338	2.26247	-0.369038	0	2.07853	1.36289	2.87142	0	3.23685	0.655	-0.232406	-0.0919186	-0.162162	2.875		-0.0833957	-0.115622	3.54303		1.52857e-21	1.52508e-21	40.5265	1.06103	1.31766	0.61997	0.00139717	4.07555	-4.07555					-10.8602
0.6	1200	0.64496		0.6	3.14159		0.397607	0.105352	0.0279979	0.00746246	1.19156	0.313683	0.0958524	0.0312225	0.0105552	4.01113	-4.68338	2.26247	-0.369038	0	2.06826	1.36289	3.04215	0	3.51575	0.655	-0.278887	-0.110302	-0.194595	2.875		-0.0906462	-0.13354	3.87256		1.71086e-21	1.68319e-21	40.5265	1.06103	1.31766	0.64496	0.00155759	4.5435	-4.5435					-11.3209
0.6	1400	0.66607		0.6	3.14159		0.410621	0.108801	0.0289143	0.00770671	1.29482	0.355422	0.112725	0.0380437	0.0133131	4.01113	-4.68338	2.26247	-0.369038	0	2.05959	1.36289	3.19853	0	3.77012	0.655	-0.325368	-0.128686	-0.227027	2.875		-0.0971566	-0.151049	4.17673		1.88347e-21	1.82977e-21	40.5265	1.06103	1.31766	0.66607	0.00170868	4.98421	-4.98421					-11.7114
0.6	1600	0.6844		0.6	3.14159		0.421921	0.111795	0.02971	0.0079188	1.39218	0.395957	0.129602	0.0450714	0.0162396	4.01113	-4.68338	2.26247	-0.369038	0	2.05205	1.36289	3.34429	0	4.00639	0.655	-0.371849	-0.14707	-0.259459	2.875		-0.103118	-0.168255	4.46219		2.04889e-21	1.9678e-21	40.5265	1.06103	1.31766	0.6844	0.00185283	5.4047	-5.4047					-12.0515
0.6	1800	0.70067		0.6	3.14159		0.431952	0.114452	0.0304163	0.00810705	1.48521	0.435679	0.146564	0.0523147	0.0193329	4.01113	-4.68338	2.26247	-0.369038	0	2.04537	1.36289	3.48215	0	4.2292	0.655	-0.41833	-0.165453	-0.291892	2.875		-0.108673	-0.185237	4.73373		2.20899e-21	2.09949e-21	40.5265	1.06103	1.31766	0.70067	0.00199184	5.81021	-5.81021					-12.3542
0.6	2000	0.71533		0.6	3.14159		0.440989	0.116847	0.0310527	0.00827667	1.57484	0.474806	0.163645	0.0597713	0.0225881	4.01113	-4.68338	2.26247	-0.369038	0	2.03934	1.36289	3.61377	0	4.44138	0.655	-0.464811	-0.183837	-0.324324	2.875		-0.113906	-0.202041	4.99428		2.36488e-21	2.22617e-21	40.5265	1.06103	1.31766	0.71533	0.0021268	6.20389	-6.20389					-12.6276
0.6	2200	0.72869		0.6	3.14159		0.449226	0.119029	0.0316326	0.00843125	1.66173	0.513486	0.180863	0.0674365	0.0260006	4.01113	-4.68338	2.26247	-0.369038	0	2.03385	1.36289	3.74028	0	4.64489	0.655	-0.511293	-0.202221	-0.356757	2.875		-0.118877	-0.2187	5.24586		2.51734e-21	2.34877e-21	40.5265	1.06103	1.31766	0.72869	0.00225846	6.58792	-6.58792					-12.8772
0.6	2400	0.74099		0.6	3.14159		0.456808	0.121038	0.0321666	0.00857357	1.74646	0.551869	0.198254	0.0753155	0.0295704	4.01113	-4.68338	2.26247	-0.369038	0	2.02879	1.36289	3.86269	0	4.8414	0.655	-0.557774	-0.220605	-0.389189	2.875		-0.123638	-0.235243	5.49021		2.66705e-21	2.46809e-21	40.5265	1.06103	1.31766	0.74099	0.00238746	6.96422	-6.96422					-13.1075
0.6	2600	0.75241		0.6	3.14159		0.463849	0.122904	0.0326623	0.0087057	1.82947	0.590084	0.215846	0.0834148	0.0332992	4.01113	-4.68338	2.26247	-0.369038	0	2.0241	1.36289	3.98175	0	5.0322	0.655	-0.604255	-0.238988	-0.421622	2.875		-0.128231	-0.251694	5.72866		2.81455e-21	2.58479e-21	40.5265	1.06103	1.31766	0.75241	0.00251433	7.3343	-7.3343					-13.3217
0.6	2800	0.76307		0.6	3.14159		0.47042	0.124645	0.0331251	0.00882905	1.91099	0.628167	0.233638	0.0917264	0.0371823	4.01113	-4.68338	2.26247	-0.369038	0	2.01972	1.36289	4.09789	0	5.21802	0.655	-0.650736	-0.257372	-0.454054	2.875		-0.132675	-0.268062	5.96196		2.96012e-21	2.69917e-21	40.5265	1.06103	1.31766	0.76307	0.00263933	7.69892	-7.69892					-13.522
0.6	3000	0.77308		0.6	3.14159		0.476591	0.12628	0.0335596	0.00894487	1.99131	0.666201	0.251648	0.100255	0.0412211	4.01113	-4.68338	2.26247	-0.369038	0	2.01561	1.36289	4.21158	0	5.39967	0.655	-0.697217	-0.275756	-0.486486	2.875		-0.136997	-0.284363	6.19095		3.10408e-21	2.81166e-21	40.5265	1.06103	1.31766	0.77308	0.00276279	8.05906	-8.05906					-13.7104
0.5	6.17585	0.0077114	0	0.5	3.14159		0.00445881	0.00116859	0.000307179	8.09876e-05	0.00449887	1.00597e-05	2.99474e-08	1.00237e-10	3.57908e-13	3.96281	-4.69359	2.29092	-0.378351	0	2.33036	1.36289	1.00931	0	0.017781	0.655	-0.0014353	-0.000567675	-0.00100149	2.875		-0.000297903	-0.000594162	0.0194278		6.59796e-24	6.03552e-24	40.5265	1.06103	1.31766	0.00749	5.88795e-06	0.0171751	-0.0171751					-0.11651
0.5	16.2831	0.021019	-0.14167	0.5	3.14159		0.0121534	0.00318523	0.000837279	0.000220748	0.0124549	7.63018e-05	6.20733e-07	5.67182e-09	5.52352e-11	3.96281	-4.69359	2.29092	-0.378351	0	2.32523	1.36289	1.02569	0	0.0489997	0.655	-0.00378428	-0.00149672	-0.0026405	2.875		-0.000836719	-0.00159486	0.0533993		1.80672e-23	1.6712e-23	40.5265	1.06103	1.31766	0.02063	1.61712e-05	0.0471714	-0.188841					-0.317889
0.5	30.7934	0.041842	-0.445	0.5	3.14159		0.0241935	0.00634076	0.00166675	0.000439438	0.0254131	0.000312435	5.08023e-06	9.2631e-08	1.79869e-09	3.96281	-4.69359	2.29092	-0.378351	0	2.3172	1.36289	1.05221	0	0.0992524	0.655	-0.00715656	-0.00283049	-0.00499352	2.875		-0.00174333	-0.00310499	0.107754		3.62747e-23	3.41129e-23	40.5265	1.06103	1.31766	0.04215	3.26139e-05	0.0951349	-0.540135					-0.633803
0.5	45.8041	0.065955	-0.78167	0.5	3.14159		0.0381359	0.00999486	0.00262728	0.00069268	0.0412406	0.000806753	2.07749e-05	5.98793e-07	1.83626e-08	3.96281	-4.69359	2.29092	-0.378351	0	2.30791	1.36289	1.0843	0	0.159689	0.655	-0.0106451	-0.00421025	-0.00742769	2.875		-0.00289171	-0.00478343	0.17267		5.78653e-23	5.53936e-23	40.5265	1.06103	1.31766	0.06629	5.22807e-05	0.152503	-0.934173					-1.00086
0.5	60.6146	0.092893	-1.165	0.5	3.14159		0.0537117	0.0140771	0.00370034	0.000975592	0.0600431	0.00167183	6.09559e-05	2.4824e-06	1.07447e-07	3.96281	-4.69359	2.29092	-0.378351	0	2.29753	1.36289	1.12203	0	0.230231	0.655	-0.0140872	-0.00557161	-0.0098294	2.875		-0.00430271	-0.00659296	0.247944		8.28063e-23	8.0721e-23	40.5265	1.06103	1.31766	0.09364	7.51934e-05	0.219339	-1.38434					-1.41249
0.5	70.7219	0.1134	-1.42333	0.5	3.14159		0.0655691	0.0171847	0.00451722	0.00119096	0.0752091	0.00257709	0.000115169	5.73957e-06	3.03769e-07	3.96281	-4.69359	2.29092	-0.378351	0	2.28962	1.36289	1.15218	0	0.286205	0.655	-0.0164362	-0.00650065	-0.0114684	2.875		-0.00547008	-0.00794074	0.307377		1.02503e-22	1.01191e-22	40.5265	1.06103	1.31766	0.11399	9.34105e-05	0.272478	-1.69581					-1.72695
0.5	80.729	0.13562	-1.73333	0.5	3.14159		0.0784169	0.0205519	0.00540234	0.00142432	0.0925349	0.00382546	0.000205355	1.2272e-05	7.7816e-07	3.96281	-4.69359	2.29092	-0.378351	0	2.28106	1.36289	1.18631	0	0.349209	0.655	-0.0187619	-0.00742049	-0.0130912	2.875		-0.00682894	-0.0093873	0.374034		1.24663e-22	1.24622e-22	40.5265	1.06103	1.31766	0.13625	0.00011401	0.332568	-2.0659					-2.06876
0.5	90.8362	0.16008	-2.03833	0.5	3.14159		0.09256	0.0242586	0.00637669	0.00168121	0.112759	0.00555587	0.000353748	2.50264e-05	1.87685e-06	3.96281	-4.69359	2.29092	-0.378351	0	2.27163	1.36289	1.22578	0	0.421567	0.655	-0.0211109	-0.00834953	-0.0147302	2.875		-0.00844187	-0.0109811	0.450352		1.50192e-22	1.52034e-22	40.5265	1.06103	1.31766	0.16049	0.000137851	0.402113	-2.44044					-2.44632
0.5	100.643	0.18566	-2.395	0.5	3.14159		0.107351	0.028135	0.00739565	0.00194986	0.135303	0.00781107	0.000579761	4.77181e-05	4.15918e-06	3.96281	-4.69359	2.29092	-0.378351	0	2.26177	1.36289	1.2693	0	0.500828	0.655	-0.0233901	-0.00925098	-0.0163205	2.875		-0.0102657	-0.0126705	0.533747		1.7835e-22	1.82664e-22	40.5265	1.06103	1.31766	0.18662	0.000164251	0.479121	-2.87412					-2.84262
0.5	115.854	0.22792	-2.90667	0.5	3.14159		0.131786	0.0345391	0.00907905	0.00239369	0.175995	0.0126858	0.00116575	0.0001184	1.27136e-05	3.96281	-4.69359	2.29092	-0.378351	0	2.24548	1.36289	1.34674	0	0.640519	0.655	-0.0269251	-0.0106491	-0.0187871	2.875		-0.0136052	-0.0155728	0.680423		2.28709e-22	2.3813e-22	40.5265	1.06103	1.31766	0.22833	0.000211644	0.617366	-3.52404					-3.5006
0.5	130.865	0.27002	-3.36667	0.5	3.14159		0.156128	0.040919	0.0107561	0.00283584	0.221356	0.0192262	0.00211104	0.000255344	3.25988e-05	3.96281	-4.69359	2.29092	-0.378351	0	2.22925	1.36289	1.43149	0	0.79169	0.655	-0.0304137	-0.0120289	-0.0212213	2.875		-0.0173704	-0.0186962	0.839015		2.84554e-22	3.00183e-22	40.5265	1.06103	1.31766	0.27039	0.000264342	0.771085	-4.13775					-4.16013
0.5	145.275	0.30767	-3.81333	0.5	3.14159		0.177898	0.0466245	0.0122558	0.00323125	0.266598	0.0267909	0.00337766	0.000467724	6.8259e-05	3.96281	-4.69359	2.29092	-0.378351	0	2.21473	1.36289	1.51455	0	0.938293	0.655	-0.0337627	-0.0133535	-0.0235581	2.875		-0.0211456	-0.0217834	0.992923		3.40266e-22	3.62256e-22	40.5265	1.06103	1.31766	0.30699	0.000316958	0.924567	-4.7379					-4.75335
0.5	160.386	0.34228	-4.34	0.5	3.14159		0.19791	0.0518693	0.0136345	0.00359473	0.312632	0.0354484	0.0050074	0.000774804	0.000126174	3.96281	-4.69359	2.29092	-0.378351	0	2.20139	1.36289	1.59771	0	1.0837	0.655	-0.0372746	-0.0147424	-0.0260085	2.875		-0.0249892	-0.024957	1.14586		3.9718e-22	4.25552e-22	40.5265	1.06103	1.31766	0.34146	0.000370679	1.08127	-5.42127					-5.30152
0.5	201.115	0.41169	-4.96167	0.5	3.14159		0.238044	0.0623878	0.0163994	0.0043237	0.420175	0.0589641	0.0101638	0.00190862	0.000376159	3.96281	-4.69359	2.29092	-0.378351	0	2.17464	1.36289	1.78731	0	1.41088	0.655	-0.0467402	-0.0184862	-0.0326132	2.875		-0.0339118	-0.0327176	1.49172		5.3177e-22	5.73767e-22	40.5265	1.06103	1.31766	0.41153	0.000497336	1.45073	-6.4124					-6.40906
0.5	252.351	0.46767	-5.49667	0.5	3.14159		0.270412	0.070871	0.0186293	0.00491162	0.524979	0.0856572	0.0169716	0.00364717	0.000820738	3.96281	-4.69359	2.29092	-0.378351	0	2.15306	1.36289	1.96673	0	1.71585	0.655	-0.0586479	-0.0231958	-0.0409218	2.875		-0.0424555	-0.0409999	1.81718		6.65991e-22	7.18448e-22	40.5265	1.06103	1.31766	0.46736	0.000622829	1.81679	-7.31346					-7.31028
0.5	301.887	0.50499	-5.81667	0.5	3.14159		0.291991	0.0765265	0.020116	0.00530356	0.605874	0.108423	0.0233813	0.00545274	0.0013296	3.96281	-4.69359	2.29092	-0.378351	0	2.13867	1.36289	2.10215	0	1.94357	0.655	-0.0701602	-0.027749	-0.0489546	2.875		-0.0489099	-0.0480102	2.06268		7.72121e-22	8.30194e-22	40.5265	1.06103	1.31766	0.50507	0.000721365	2.10422	-7.92089					-7.91505
0.5	352.423	0.53392	-6.03167	0.5	3.14159		0.308718	0.0809106	0.0212684	0.0056074	0.675718	0.12941	0.0296893	0.0073492	0.00189991	3.96281	-4.69359	2.29092	-0.378351	0	2.12752	1.36289	2.21717	0	2.13558	0.655	-0.081905	-0.0323942	-0.0571496	2.875		-0.0543709	-0.0545415	2.27156		8.65686e-22	9.26687e-22	40.5265	1.06103	1.31766	0.53371	0.000807707	2.35608	-8.38775					-8.38603
0.5	399.856	0.5559	-6.18	0.5	3.14159		0.321427	0.0842414	0.0221439	0.00583824	0.733483	0.147614	0.0354273	0.00915802	0.00247019	3.96281	-4.69359	2.29092	-0.378351	0	2.11905	1.36289	2.3111	0	2.29151	0.655	-0.0929289	-0.0367542	-0.0648416	2.875		-0.0588055	-0.0602903	2.44255		9.44459e-22	1.00649e-21	40.5265	1.06103	1.31766	0.55596	0.000880024	2.56703	-8.74703					-8.74514
0.5	449.192	0.57519	-6.26167	0.5	3.14159		0.332581	0.0871647	0.0229123	0.00604083	0.787866	0.165401	0.0412454	0.0110613	0.00309286	3.96281	-4.69359	2.29092	-0.378351	0	2.11161	1.36289	2.39861	0	2.43614	0.655	-0.104395	-0.0412891	-0.0728419	2.875		-0.0629119	-0.0659902	2.60228		1.01977e-21	1.08161e-21	40.5265	1.06103	1.31766	0.57512	0.000948854	2.76781	-9.02948					-9.06121
0.5	501.029	0.59264	-6.37	0.5	3.14159		0.342671	0.0898091	0.0236075	0.00622409	0.840293	0.183105	0.0472238	0.0130804	0.00377481	3.96281	-4.69359	2.29092	-0.378351	0	2.10489	1.36289	2.48217	0	2.57374	0.655	-0.116442	-0.0460538	-0.0812479	2.875		-0.0668074	-0.0717476	2.75527		1.09341e-21	1.154e-21	40.5265	1.06103	1.31766	0.59263	0.00101588	2.96333	-9.33333					-9.34785
0.5	599.098	0.62019	-6.49167	0.5	3.14159		0.3586	0.093984	0.0247049	0.00651343	0.929927	0.214545	0.0582539	0.0169507	0.00513309	3.96281	-4.69359	2.29092	-0.378351	0	2.09427	1.36289	2.62338	0	2.80518	0.655	-0.139234	-0.0550683	-0.0971511	2.875		-0.0733268	-0.0821704	3.01487		1.2216e-21	1.27771e-21	40.5265	1.06103	1.31766	0.62016	0.00113196	3.30193	-9.7936					-9.80182
0.5	800	0.66304		0.5	3.14159		0.383377	0.100478	0.0264118	0.00696346	1.0884	0.27339	0.0801118	0.0250728	0.0081523	3.96281	-4.69359	2.29092	-0.378351	0	2.07775	1.36289	2.86838	0	3.204	0.655	-0.185925	-0.0735349	-0.12973	2.875		-0.084438	-0.102283	3.46886		1.45482e-21	1.49618e-21	40.5265	1.06103	1.31766	0.66304	0.00134142	3.91294	-3.91294					-10.5113
0.5	1000	0.69535		0.5	3.14159		0.402059	0.105374	0.0276988	0.00730279	1.22587	0.327402	0.101338	0.0334159	0.0114322	3.96281	-4.69359	2.29092	-0.378351	0	2.06529	1.36289	3.07668	0	3.54072	0.655	-0.232406	-0.0919186	-0.162162	2.875		-0.0936804	-0.121301	3.85845		1.66319e-21	1.68533e-21	40.5265	1.06103	1.31766	0.69535	0.00152699	4.45423	-4.45423					-11.0491
0.5	1200	0.72159		0.5	3.14159		0.417231	0.10935	0.0287441	0.00757837	1.35085	0.378615	0.122326	0.0420183	0.0149585	3.96281	-4.69359	2.29092	-0.378351	0	2.05518	1.36289	3.26304	0	3.84044	0.655	-0.278887	-0.110302	-0.194595	2.875		-0.101797	-0.139697	4.20978		1.85682e-21	1.85693e-21	40.5265	1.06103	1.31766	0.72159	0.00169834	4.95407	-4.95407					-11.4875
0.5	1400	0.74382		0.5	3.14159		0.430085	0.112719	0.0296296	0.00781183	1.46739	0.428001	0.143255	0.0508883	0.018718	3.96281	-4.69359	2.29092	-0.378351	0	2.04661	1.36289	3.43449	0	4.11507	0.655	-0.325368	-0.128686	-0.227027	2.875		-0.109148	-0.15767	4.53516		2.04043e-21	2.0166e-21	40.5265	1.06103	1.31766	0.74382	0.00186003	5.42571	-5.42571					-11.8602
0.5	1600	0.76318		0.5	3.14159		0.441279	0.115653	0.0304008	0.00801516	1.57781	0.476116	0.164222	0.060026	0.0227005	3.96281	-4.69359	2.29092	-0.378351	0	2.03915	1.36289	3.59504	0	4.37138	0.655	-0.371849	-0.14707	-0.259459	2.875		-0.115938	-0.175334	4.84159		2.21669e-21	2.16754e-21	40.5265	1.06103	1.31766	0.76318	0.00201464	5.8767	-5.8767					-12.1857
0.5	1800	0.7804		0.5	3.14159		0.451236	0.118262	0.0310868	0.00819601	1.68374	0.523392	0.185324	0.0694447	0.0269047	3.96281	-4.69359	2.29092	-0.378351	0	2.03251	1.36289	3.74746	0	4.61402	0.655	-0.41833	-0.165453	-0.291892	2.875		-0.122311	-0.192768	5.13388		2.38752e-21	2.31199e-21	40.5265	1.06103	1.31766	0.7804	0.002164	6.31238	-6.31238					-12.4759
0.5	2000	0.79593		0.5	3.14159		0.460215	0.120616	0.0317054	0.00835911	1.78609	0.57004	0.206585	0.0791359	0.0313222	3.96281	-4.69359	2.29092	-0.378351	0	2.02652	1.36289	3.89334	0	4.84571	0.655	-0.464811	-0.183837	-0.324324	2.875		-0.128351	-0.210017	5.41484		2.55396e-21	2.45124e-21	40.5265	1.06103	1.31766	0.79593	0.00230914	6.73575	-6.73575					-12.7382
0.5	2200	0.81012		0.5	3.14159		0.46842	0.122766	0.0322706	0.00850814	1.88575	0.616319	0.228076	0.0891156	0.0359567	3.96281	-4.69359	2.29092	-0.378351	0	2.02105	1.36289	4.03417	0	5.06889	0.655	-0.511293	-0.202221	-0.356757	2.875		-0.134135	-0.227125	5.68701		2.71706e-21	2.58649e-21	40.5265	1.06103	1.31766	0.81012	0.00245105	7.1497	-7.1497					-12.9784
0.5	2400	0.82319		0.5	3.14159		0.475977	0.124747	0.0327913	0.0086454	1.98315	0.662314	0.249797	0.0993735	0.0408011	3.96281	-4.69359	2.29092	-0.378351	0	2.01602	1.36289	4.1707	0	5.28486	0.655	-0.557774	-0.220605	-0.389189	2.875		-0.139701	-0.244113	5.95173		2.87731e-21	2.71836e-21	40.5265	1.06103	1.31766	0.82319	0.00259021	7.55564	-7.55564					-13.2
0.5	2600	0.83534		0.5	3.14159		0.483002	0.126588	0.0332753	0.008773	2.07887	0.708215	0.271808	0.109928	0.0458628	3.96281	-4.69359	2.29092	-0.378351	0	2.01133	1.36289	4.30389	0	5.49518	0.655	-0.604255	-0.238988	-0.421622	2.875		-0.145101	-0.261009	6.2106		3.03538e-21	2.84764e-21	40.5265	1.06103	1.31766	0.83534	0.00272727	7.95546	-7.95546					-13.4063
0.5	2800	0.84669		0.5	3.14159		0.489565	0.128308	0.0337274	0.00889221	2.17311	0.754046	0.294096	0.120768	0.0511344	3.96281	-4.69359	2.29092	-0.378351	0	2.00696	1.36289	4.4341	0	5.70049	0.655	-0.650736	-0.257372	-0.454054	2.875		-0.150353	-0.277824	6.46431		3.19152e-21	2.97461e-21	40.5265	1.06103	1.31766	0.84669	0.00286247	8.34983	-8.34983					-13.5994
0.5	3000	0.85736		0.5	3.14159		0.495735	0.129925	0.0341524	0.00900427	2.26624	0.799927	0.316701	0.131905	0.0566216	3.96281	-4.69359	2.29092	-0.378351	0	2.00284	1.36289	4.56191	0	5.90176	0.655	-0.697217	-0.275756	-0.486486	2.875		-0.155489	-0.294574	6.71383		3.34613e-21	3.09977e-21	40.5265	1.06103	1.31766	0.85736	0.0029962	8.7399	-8.7399					-13.7812
0.4	6.02574	0.0082313	0	0.4	3.14159		0.00449764	0.00116662	0.00030343	7.91418e-05	0.0045384	1.02367e-05	3.07401e-08	1.03787e-10	3.73493e-13	3.9175	-4.70196	2.31722	-0.387119	0	2.33033	1.36289	1.00934	0	0.0177311	0.655	-0.00140042	-0.000553878	-0.000977148	2.875		-0.000296183	-0.000582769	0.0193441		6.50985e-24	5.97484e-24	40.5265	1.06103	1.31766	0.0082313	5.81452e-06	0.0169609	-0.0169609					-0.113135
0.4	15.8327	0.022429	-0.1725	0.4	3.14159		0.0122554	0.00317886	0.000826798	0.000215649	0.012562	7.76086e-05	6.36682e-07	5.86647e-09	5.76108e-11	3.9175	-4.70196	2.31722	-0.387119	0	2.32516	1.36289	1.02577	0	0.0488482	0.655	-0.00367962	-0.00145532	-0.00256747	2.875		-0.000832133	-0.001561	0.0531469		1.78104e-23	1.65389e-23	40.5265	1.06103	1.31766	0.022429	1.59582e-05	0.0465501	-0.21905					-0.308485
0.4	30.3931	0.045688	-0.46	0.4	3.14159		0.0249642	0.00647535	0.00168419	0.000439278	0.0262645	0.000333362	5.59463e-06	1.05277e-07	2.10958e-09	3.9175	-4.70196	2.31722	-0.387119	0	2.31669	1.36289	1.05365	0	0.101337	0.655	-0.00706353	-0.00279369	-0.00492861	2.875		-0.00177958	-0.00309716	0.109794		3.65742e-23	3.45874e-23	40.5265	1.06103	1.31766	0.045688	3.29336e-05	0.0960673	-0.556067					-0.629089
0.4	45.5539	0.073417	-0.785	0.4	3.14159		0.0401155	0.0104054	0.00270637	0.000705886	0.043563	0.000897619	2.4331e-05	7.37991e-07	2.38125e-08	3.9175	-4.70196	2.31722	-0.387119	0	2.30659	1.36289	1.08849	0	0.166493	0.655	-0.010587	-0.00418725	-0.00738712	2.875		-0.00302378	-0.00483895	0.179569		5.94848e-23	5.73949e-23	40.5265	1.06103	1.31766	0.073417	5.38615e-05	0.157114	-0.942114					-1.01224
0.4	60.7648	0.10603	-1.22667	0.4	3.14159		0.0579355	0.0150276	0.00390858	0.00101945	0.065358	0.00196856	7.75302e-05	3.40862e-06	1.59232e-07	3.9175	-4.70196	2.31722	-0.387119	0	2.29471	1.36289	1.13188	0	0.246962	0.655	-0.0141221	-0.00558541	-0.00985374	2.875		-0.00465094	-0.00679569	0.265099		8.74301e-23	8.61807e-23	40.5265	1.06103	1.31766	0.10603	7.96406e-05	0.232312	-1.45898					-1.46419
0.4	71.0221	0.13153	-1.50916	0.4	3.14159		0.0718689	0.0186417	0.00484858	0.00126463	0.0835847	0.00315277	0.000154765	8.46497e-06	4.91487e-07	3.9175	-4.70196	2.31722	-0.387119	0	2.28542	1.36289	1.16776	0	0.312974	0.655	-0.0165059	-0.00652825	-0.0115171	2.875		-0.00605055	-0.00828216	0.334863		1.10232e-22	1.10303e-22	40.5265	1.06103	1.31766	0.13153	0.000100841	0.294153	-1.80332					-1.81854
0.4	80.9291	0.15948	-1.88583	0.4	3.14159		0.0871409	0.0226031	0.0058789	0.00153336	0.104862	0.0048462	0.000289957	1.92906e-05	1.36095e-06	3.9175	-4.70196	2.31722	-0.387119	0	2.27524	1.36289	1.2092	0	0.388674	0.655	-0.0188084	-0.00743889	-0.0131236	2.875		-0.00771813	-0.00989222	0.414541		1.36389e-22	1.38521e-22	40.5265	1.06103	1.31766	0.15948	0.000125303	0.365508	-2.25134					-2.20793
0.4	90.8362	0.19111	-2.25417	0.4	3.14159		0.104424	0.027086	0.00704487	0.00183747	0.130723	0.00732613	0.000528408	4.22796e-05	3.58318e-06	3.9175	-4.70196	2.31722	-0.387119	0	2.26372	1.36289	1.25897	0	0.47887	0.655	-0.0211109	-0.00834953	-0.0147302	2.875		-0.00978133	-0.0117207	0.509161		1.67725e-22	1.72904e-22	40.5265	1.06103	1.31766	0.19111	0.000154759	0.451431	-2.7056					-2.64984
0.4	100.743	0.22639	-2.70416	0.4	3.14159		0.123701	0.0320862	0.0083454	0.00217668	0.162028	0.0109011	0.000937652	8.92373e-05	8.98377e-06	3.9175	-4.70196	2.31722	-0.387119	0	2.25087	1.36289	1.3184	0	0.585625	0.655	-0.0234133	-0.00926018	-0.0163367	2.875		-0.0123162	-0.0138097	0.62087		2.05234e-22	2.14635e-22	40.5265	1.06103	1.31766	0.22639	0.000190168	0.55472	-3.25888					-3.1443
0.4	115.604	0.28351	-3.31083	0.4	3.14159		0.154912	0.0401818	0.010451	0.00272588	0.218964	0.0188542	0.00205317	0.000246345	3.11993e-05	3.9175	-4.70196	2.31722	-0.387119	0	2.23006	1.36289	1.42443	0	0.7738	0.655	-0.026867	-0.0106261	-0.0187466	2.875		-0.0169892	-0.017424	0.817455		2.72895e-22	2.90798e-22	40.5265	1.06103	1.31766	0.28351	0.000254272	0.741711	-4.05255					-3.94835
0.4	131.365	0.34158	-3.82417	0.4	3.14159		0.186642	0.0484121	0.0125916	0.0032842	0.286155	0.030356	0.00402771	0.000586274	8.98833e-05	3.9175	-4.70196	2.31722	-0.387119	0	2.20891	1.36289	1.54655	0	0.987384	0.655	-0.03053	-0.0120749	-0.0213024	2.875		-0.0225494	-0.0215908	1.04064		3.52563e-22	3.80988e-22	40.5265	1.06103	1.31766	0.34158	0.000329885	0.962276	-4.78645					-4.77021
0.4	145.175	0.38455	-4.19083	0.4	3.14159		0.210121	0.0545022	0.0141756	0.00369735	0.343056	0.0416572	0.00627484	0.00103362	0.000179039	3.9175	-4.70196	2.31722	-0.387119	0	2.19325	1.36289	1.64774	0	1.16219	0.655	-0.0337395	-0.0133443	-0.0235419	2.875		-0.0272616	-0.0251536	1.22367		4.20279e-22	4.57525e-22	40.5265	1.06103	1.31766	0.38455	0.000394122	1.14965	-5.34048					-5.38123
0.4	160.636	0.42326	-4.55833	0.4	3.14159		0.231272	0.0599886	0.0156026	0.00406954	0.400438	0.0543322	0.00907675	0.00165347	0.000316269	3.9175	-4.70196	2.31722	-0.387119	0	2.17915	1.36289	1.74797	0	1.33364	0.655	-0.0373327	-0.0147654	-0.0260491	2.875		-0.0319964	-0.0288437	1.40373		4.89011e-22	5.34787e-22	40.5265	1.06103	1.31766	0.42326	0.000459213	1.33953	-5.89786					-5.93377
0.4	201.965	0.49376	-5.11834	0.4	3.14159		0.269794	0.0699805	0.0182014	0.00474738	0.522801	0.085069	0.0168127	0.00360426	0.000809148	3.9175	-4.70196	2.31722	-0.387119	0	2.15347	1.36289	1.95641	0	1.68565	0.655	-0.0469379	-0.0185644	-0.0327511	2.875		-0.0419764	-0.0372299	1.77573		6.37705e-22	6.99612e-22	40.5265	1.06103	1.31766	0.49376	0.000599424	1.74852	-6.86685					-6.94516
0.4	252.802	0.54719	-5.5125	0.4	3.14159		0.298988	0.0775532	0.020171	0.00526109	0.634282	0.116817	0.0258622	0.00618594	0.0015463	3.9175	-4.70196	2.31722	-0.387119	0	2.13401	1.36289	2.14097	0	1.99306	0.655	-0.0587525	-0.0232372	-0.0409949	2.875		-0.0508736	-0.0456796	2.10395		7.76379e-22	8.49711e-22	40.5265	1.06103	1.31766	0.54719	0.000729242	2.1272	-7.6397					-7.71606
0.4	302.387	0.5833	-5.75584	0.4	3.14159		0.318719	0.082671	0.0215021	0.00560828	0.720811	0.143558	0.034129	0.00874247	0.00233718	3.9175	-4.70196	2.31722	-0.387119	0	2.12085	1.36289	2.28122	0	2.22447	0.655	-0.0702765	-0.027795	-0.0490357	2.875		-0.0576261	-0.052858	2.35348		8.86432e-22	9.66112e-22	40.5265	1.06103	1.31766	0.5833	0.000831557	2.42565	-8.18149					-8.2392
0.4	352.423	0.61129	-5.95667	0.4	3.14159		0.334013	0.086638	0.0225339	0.0058774	0.795114	0.167817	0.0420505	0.0113296	0.0031823	3.9175	-4.70196	2.31722	-0.387119	0	2.11066	1.36289	2.39981	0	2.41885	0.655	-0.081905	-0.0323942	-0.0571496	2.875		-0.0633107	-0.059478	2.56488		9.82704e-22	1.06598e-21	40.5265	1.06103	1.31766	0.61129	0.000920548	2.68524	-8.64191					-8.64589
0.4	401.307	0.63361	-6.04917	0.4	3.14159		0.346209	0.0898015	0.0233567	0.006092	0.85945	0.189703	0.0494966	0.0138632	0.00404448	3.9175	-4.70196	2.31722	-0.387119	0	2.10253	1.36289	2.50122	0	2.58425	0.655	-0.0932661	-0.0368876	-0.0650769	2.875		-0.0681469	-0.0655495	2.7461		1.06737e-21	1.15236e-21	40.5265	1.06103	1.31766	0.63361	0.000998435	2.91243	-8.9616					-8.97094
0.4	450.893	0.65281	-6.12584	0.4	3.14159		0.3567	0.0925227	0.0240645	0.0062766	0.918762	0.210552	0.0568258	0.0164399	0.00495041	3.9175	-4.70196	2.31722	-0.387119	0	2.09553	1.36289	2.59376	0	2.73456	0.655	-0.10479	-0.0414454	-0.0731177	2.875		-0.0725355	-0.0714225	2.91188		1.14648e-21	1.23193e-21	40.5265	1.06103	1.31766	0.65281	0.00107091	3.12385	-9.24969					-9.25108
0.4	501.679	0.66989	-6.22667	0.4	3.14159		0.366032	0.0949434	0.0246941	0.00644082	0.974877	0.230832	0.0641558	0.0190894	0.0059081	3.9175	-4.70196	2.31722	-0.387119	0	2.08931	1.36289	2.68052	0	2.87499	0.655	-0.116593	-0.0461136	-0.0813533	2.875		-0.0766268	-0.077215	3.06769		1.22222e-21	1.30714e-21	40.5265	1.06103	1.31766	0.66989	0.00114005	3.32553	-9.5522					-9.50069
0.4	598.648	0.69737	-6.3025	0.4	3.14159		0.381048	0.0988381	0.0257071	0.00670503	1.07241	0.267278	0.0777759	0.02418	0.00781104	3.9175	-4.70196	2.31722	-0.387119	0	2.0793	1.36289	2.8296	0	3.11531	0.655	-0.139129	-0.0550269	-0.0970781	2.875		-0.0836014	-0.0878126	3.33646		1.35589e-21	1.4377e-21	40.5265	1.06103	1.31766	0.69737	0.0012615	3.67978	-9.98228					-9.90311
0.4	800	0.74118		0.4	3.14159		0.404986	0.105047	0.0273221	0.00712625	1.24899	0.336733	0.105103	0.0349353	0.0120453	3.9175	-4.70196	2.31722	-0.387119	0	2.06334	1.36289	3.09453	0	3.53965	0.655	-0.185925	-0.0735349	-0.12973	2.875		-0.0958155	-0.108565	3.8173		1.60375e-21	1.67345e-21	40.5265	1.06103	1.31766	0.74118	0.00148504	4.33185	-4.33185					-10.5467
0.4	1000	0.77443		0.4	3.14159		0.423154	0.10976	0.0285478	0.00744594	1.40326	0.400639	0.131581	0.0459074	0.0165928	3.9175	-4.70196	2.31722	-0.387119	0	2.05123	1.36289	3.32136	0	3.90062	0.655	-0.232406	-0.0919186	-0.162162	2.875		-0.106092	-0.128154	4.2323		1.82565e-21	1.87871e-21	40.5265	1.06103	1.31766	0.77443	0.00168365	4.91122	-4.91122					-11.0369
0.4	1200	0.80159		0.4	3.14159		0.437994	0.113609	0.0295489	0.00770708	1.5445	0.461469	0.157783	0.0571951	0.0214559	3.9175	-4.70196	2.31722	-0.387119	0	2.04134	1.36289	3.5257	0	4.22423	0.655	-0.278887	-0.110302	-0.194595	2.875		-0.115216	-0.147107	4.60866		2.03247e-21	2.06601e-21	40.5265	1.06103	1.31766	0.80159	0.00186772	5.44814	-5.44814					-11.4384
0.4	1400	0.82469		0.4	3.14159		0.450616	0.116883	0.0304005	0.00792918	1.67692	0.520319	0.183938	0.0688198	0.0266229	3.9175	-4.70196	2.31722	-0.387119	0	2.03292	1.36289	3.7147	0	4.5224	0.655	-0.325368	-0.128686	-0.227027	2.875		-0.123553	-0.165625	4.95869		2.22899e-21	2.24105e-21	40.5265	1.06103	1.31766	0.82469	0.00204186	5.95611	-5.95611					-11.7807
0.4	1600	0.84488		0.4	3.14159		0.461648	0.119745	0.0311447	0.0081233	1.80305	0.577862	0.21019	0.0807975	0.0320881	3.9175	-4.70196	2.31722	-0.387119	0	2.02557	1.36289	3.89258	0	4.80216	0.655	-0.371849	-0.14707	-0.259459	2.875		-0.131322	-0.183829	5.28966		2.41808e-21	2.40725e-21	40.5265	1.06103	1.31766	0.84488	0.00220883	6.44317	-6.44317					-12.0804
0.4	1800	0.86286		0.4	3.14159		0.471472	0.122293	0.0318075	0.00829618	1.92442	0.634492	0.236616	0.0931293	0.037843	3.9175	-4.70196	2.31722	-0.387119	0	2.01902	1.36289	4.06192	0	5.06778	0.655	-0.41833	-0.165453	-0.291892	2.875		-0.138656	-0.201793	5.60602		2.60147e-21	2.56666e-21	40.5265	1.06103	1.31766	0.86286	0.00237031	6.91419	-6.91419					-12.3477
0.4	2000	0.87913		0.4	3.14159		0.480362	0.124599	0.0324073	0.00845261	2.04229	0.690595	0.26332	0.10584	0.0438935	3.9175	-4.70196	2.31722	-0.387119	0	2.01309	1.36289	4.22481	0	5.32271	0.655	-0.464811	-0.183837	-0.324324	2.875		-0.145665	-0.219577	5.91131		2.78059e-21	2.72099e-21	40.5265	1.06103	1.31766	0.87913	0.00252768	7.37323	-7.37323					-12.59
0.4	2200	0.894		0.4	3.14159		0.488488	0.126706	0.0329555	0.00859558	2.1573	0.746316	0.290316	0.118919	0.0502303	3.9175	-4.70196	2.31722	-0.387119	0	2.00767	1.36289	4.38234	0	5.56877	0.655	-0.511293	-0.202221	-0.356757	2.875		-0.152403	-0.237213	6.20743		2.95619e-21	2.87113e-21	40.5265	1.06103	1.31766	0.894	0.00268164	7.82234	-7.82234					-12.8118
0.4	2400	0.90773		0.4	3.14159		0.49599	0.128652	0.0334616	0.00872759	2.27018	0.801885	0.317672	0.132387	0.0568603	3.9175	-4.70196	2.31722	-0.387119	0	2.00267	1.36289	4.53569	0	5.80788	0.655	-0.557774	-0.220605	-0.389189	2.875		-0.158935	-0.254734	6.49637		3.12907e-21	3.01803e-21	40.5265	1.06103	1.31766	0.90773	0.00283298	8.2638	-8.2638					-13.0168
0.4	2600	0.9205		0.4	3.14159		0.502967	0.130462	0.0339323	0.00885037	2.38138	0.857428	0.345417	0.146246	0.0637835	3.9175	-4.70196	2.31722	-0.387119	0	1.99802	1.36289	4.6856	0	6.04125	0.655	-0.604255	-0.238988	-0.421622	2.875		-0.165297	-0.272161	6.77938		3.29973e-21	3.1623e-21	40.5265	1.06103	1.31766	0.9205	0.00298219	8.69905	-8.69905					-13.2077
0.4	2800	0.93244		0.4	3.14159		0.509491	0.132155	0.0343725	0.00896517	2.49115	0.913	0.373551	0.160489	0.0709947	3.9175	-4.70196	2.31722	-0.387119	0	1.99367	1.36289	4.83252	0	6.26966	0.655	-0.650736	-0.257372	-0.454054	2.875		-0.171513	-0.289508	7.05726		3.4685e-21	3.3043e-21	40.5265	1.06103	1.31766	0.93244	0.00312956	9.12893	-9.12893					-13.3864
0.4	3000	0.94368		0.4	3.14159		0.515633	0.133748	0.0347868	0.00907324	2.59996	0.968774	0.40214	0.175144	0.0785069	3.9175	-4.70196	2.31722	-0.387119	0	1.98958	1.36289	4.97716	0	6.49424	0.655	-0.697217	-0.275756	-0.486486	2.875		-0.177623	-0.306796	7.3312		3.63586e-21	3.44464e-21	40.5265	1.06103	1.31766	0.94368	0.00327559	9.55488	-9.55488					-13.5548
0.3	5.87564	0.0087192	0	0.3	3.14159		0.00453014	0.00116356	0.000299544	7.73001e-05	0.0045715	1.03861e-05	3.14145e-08	1.06831e-10	3.87416e-13	3.87494	-4.70878	2.34158	-0.395386	0	2.33031	1.36289	1.00936	0	0.0176654	0.655	-0.00136553	-0.000540081	-0.000952806	2.875		-0.000294246	-0.000571257	0.0192444		6.41891e-24	5.91078e-24	40.5265	1.06103	1.31766	0.00891	5.73836e-06	0.0167388	-0.0167388					-0.104246
0.3	15.3824	0.023752	-0.20333	0.3	3.14159		0.0123406	0.00316966	0.00081599	0.000210573	0.0126515	7.87098e-05	6.50225e-07	6.03302e-09	5.96593e-11	3.87494	-4.70878	2.34158	-0.395386	0	2.32511	1.36289	1.02583	0	0.0486548	0.655	-0.00357496	-0.00141393	-0.00249444	2.875		-0.000826977	-0.00152683	0.0528521		1.75461e-23	1.63569e-23	40.5265	1.06103	1.31766	0.02312	1.5738e-05	0.0459076	-0.249238					-0.284462
0.3	29.9928	0.049597	-0.475	0.3	3.14159		0.0257686	0.00661863	0.00170388	0.000439702	0.027156	0.000355974	6.16828e-06	1.19831e-07	2.47886e-09	3.87494	-4.70878	2.34158	-0.395386	0	2.31615	1.36289	1.05517	0	0.103566	0.655	-0.00697051	-0.0027569	-0.0048637	2.875		-0.00181898	-0.00309107	0.111982		3.69151e-23	3.51109e-23	40.5265	1.06103	1.31766	0.04961	3.3293e-05	0.0971157	-0.572116					-0.595734
0.3	45.3037	0.081497	-0.78833	0.3	3.14159		0.0423425	0.0108756	0.00279979	0.000722512	0.0461984	0.00100628	2.88124e-05	9.22851e-07	3.144e-08	3.87494	-4.70878	2.34158	-0.395386	0	2.3051	1.36289	1.09328	0	0.174345	0.655	-0.0105288	-0.00416426	-0.00734655	2.875		-0.00317854	-0.00490701	0.187542		6.14013e-23	5.97498e-23	40.5265	1.06103	1.31766	0.0808	5.57288e-05	0.162561	-0.950891					-0.98244
0.3	60.9149	0.12153	-1.28833	0.3	3.14159		0.0631421	0.0162179	0.00417511	0.00107742	0.0720422	0.00237327	0.00010205	4.89509e-06	2.49401e-07	3.87494	-4.70878	2.34158	-0.395386	0	2.29124	1.36289	1.14431	0	0.268221	0.655	-0.014157	-0.00559921	-0.00987809	2.875		-0.005102	-0.00705521	0.286896		9.33999e-23	9.32424e-23	40.5265	1.06103	1.31766	0.12178	8.53858e-05	0.24907	-1.5374					-1.47166
0.3	71.3223	0.15449	-1.595	0.3	3.14159		0.0802667	0.0206164	0.00530744	0.00136963	0.0951097	0.00402974	0.000221564	1.35582e-05	8.80227e-07	3.87494	-4.70878	2.34158	-0.395386	0	2.27982	1.36289	1.18923	0	0.350082	0.655	-0.0165757	-0.00655584	-0.0115658	2.875		-0.00687409	-0.00875779	0.37296		1.21143e-22	1.23202e-22	40.5265	1.06103	1.31766	0.15337	0.000111339	0.324777	-1.91978					-1.87771
0.3	81.1293	0.19214	-2.03833	0.3	3.14159		0.0998281	0.0256407	0.00660089	0.00170342	0.123652	0.00660393	0.000454634	3.47422e-05	2.81297e-06	3.87494	-4.70878	2.34158	-0.395386	0	2.26678	1.36289	1.24407	0	0.449099	0.655	-0.0188549	-0.00745729	-0.0131561	2.875		-0.00911701	-0.0106786	0.476581		1.54787e-22	1.60362e-22	40.5265	1.06103	1.31766	0.1916	0.000143029	0.417216	-2.45555					-2.34517
0.3	90.8362	0.23754	-2.47	0.3	3.14159		0.123416	0.0316993	0.00816058	0.00210591	0.161545	0.0108415	0.000930281	8.83266e-05	8.87125e-06	3.87494	-4.70878	2.34158	-0.395386	0	2.25106	1.36289	1.3157	0	0.57707	0.655	-0.0211109	-0.00834953	-0.0147302	2.875		-0.0121519	-0.0130297	0.610025		1.98755e-22	2.09839e-22	40.5265	1.06103	1.31766	0.23838	0.000184681	0.538714	-3.00871					-2.91397
0.3	100.843	0.29275	-3.01333	0.3	3.14159		0.152101	0.0390669	0.0100573	0.00259537	0.213489	0.0180138	0.00192417	0.000226541	2.81588e-05	3.87494	-4.70878	2.34158	-0.395386	0	2.23193	1.36289	1.41194	0	0.74685	0.655	-0.0234366	-0.00926938	-0.016353	2.875		-0.0163742	-0.0160574	0.786678		2.58395e-22	2.77884e-22	40.5265	1.06103	1.31766	0.29366	0.000241424	0.704233	-3.71756					-3.61325
0.3	115.354	0.37506	-3.715	0.3	3.14159		0.194866	0.050051	0.012885	0.00332509	0.305333	0.0340149	0.00472587	0.000719513	0.000115315	3.87494	-4.70878	2.34158	-0.395386	0	2.20342	1.36289	1.57736	0	1.03376	0.655	-0.0268089	-0.0106031	-0.018706	2.875		-0.0239115	-0.021229	1.08514		3.63397e-22	3.98597e-22	40.5265	1.06103	1.31766	0.37321	0.000341562	0.996336	-4.71134					-4.67117
0.3	131.865	0.44747	-4.28167	0.3	3.14159		0.232487	0.059714	0.0153726	0.00396704	0.403929	0.0551417	0.00926445	0.00169699	0.000326361	3.87494	-4.70878	2.34158	-0.395386	0	2.17834	1.36289	1.74928	0	1.32657	0.655	-0.0306463	-0.0121209	-0.0213836	2.875		-0.0320041	-0.0268464	1.39056		4.76541e-22	5.28413e-22	40.5265	1.06103	1.31766	0.44796	0.000449399	1.3109	-5.59257					-5.61709
0.3	145.075	0.48849	-4.56833	0.3	3.14159		0.2538	0.0651881	0.0167819	0.00433071	0.468921	0.0709572	0.0131155	0.00263532	0.000555133	3.87494	-4.70878	2.34158	-0.395386	0	2.16413	1.36289	1.85991	0	1.51259	0.655	-0.0337162	-0.0133351	-0.0235256	2.875		-0.0373049	-0.0306924	1.58534		5.51698e-22	6.13984e-22	40.5265	1.06103	1.31766	0.48829	0.000520858	1.51934	-6.08767					-6.15929
0.3	160.886	0.52507	-4.77667	0.3	3.14159		0.272805	0.0700696	0.0180386	0.00465501	0.533481	0.0879665	0.0175988	0.00381754	0.000867013	3.87494	-4.70878	2.34158	-0.395386	0	2.15146	1.36289	1.96793	0	1.69269	0.655	-0.0373909	-0.0147884	-0.0260896	2.875		-0.0425279	-0.0346765	1.77467		6.26974e-22	6.98932e-22	40.5265	1.06103	1.31766	0.52529	0.000592232	1.72754	-6.50421					-6.64666
0.3	202.816	0.58851	-5.275	0.3	3.14159		0.305766	0.0785355	0.020218	0.00521744	0.6629	0.125471	0.0284792	0.0069774	0.00178567	3.87494	-4.70878	2.34158	-0.395386	0	2.12949	1.36289	2.1796	0	2.04181	0.655	-0.0471356	-0.0186426	-0.0328891	2.875		-0.0528339	-0.0432844	2.14428		7.80196e-22	8.68971e-22	40.5265	1.06103	1.31766	0.58873	0.000736763	2.14914	-7.42414					-7.50054
0.3	253.252	0.63618	-5.52833	0.3	3.14159		0.330533	0.084897	0.0218557	0.00564005	0.77761	0.162001	0.0401178	0.0106874	0.00296891	3.87494	-4.70878	2.34158	-0.395386	0	2.11298	1.36289	2.36249	0	2.34008	0.655	-0.0588572	-0.0232786	-0.0410679	2.875		-0.0617545	-0.0517192	2.46329		9.19002e-22	1.01935e-21	40.5265	1.06103	1.31766	0.63598	0.000866739	2.52828	-8.05661					-8.14936
0.3	302.887	0.66964	-5.695	0.3	3.14159		0.347918	0.0893622	0.0230052	0.00593669	0.868853	0.192966	0.0506293	0.0142563	0.00418091	3.87494	-4.70878	2.34158	-0.395386	0	2.10139	1.36289	2.50524	0	2.57103	0.655	-0.0703927	-0.027841	-0.0491169	2.875		-0.0686961	-0.0590055	2.71259		1.03155e-21	1.1387e-21	40.5265	1.06103	1.31766	0.6697	0.00097146	2.83375	-8.52875					-8.60848
0.3	352.423	0.69586	-5.88167	0.3	3.14159		0.361541	0.0928612	0.023906	0.00616915	0.94746	0.220858	0.0605272	0.0177692	0.00542783	3.87494	-4.70878	2.34158	-0.395386	0	2.09231	1.36289	2.62647	0	2.76608	0.655	-0.081905	-0.0323942	-0.0571496	2.875		-0.0745661	-0.0656931	2.92476		1.13003e-21	1.24134e-21	40.5265	1.06103	1.31766	0.69566	0.00106262	3.09966	-8.98133					-8.97038
0.3	402.758	0.71791	-5.91833	0.3	3.14159		0.372997	0.0958037	0.0246635	0.00636463	1.01896	0.247122	0.0701755	0.021314	0.00673027	3.87494	-4.70878	2.34158	-0.395386	0	2.08467	1.36289	2.73545	0	2.94064	0.655	-0.0936034	-0.037021	-0.0653122	2.875		-0.0798184	-0.0720953	3.11592		1.22078e-21	1.33454e-21	40.5265	1.06103	1.31766	0.718	0.00114626	3.34363	-9.26196					-9.27617
0.3	452.594	0.73659	-5.99	0.3	3.14159		0.382702	0.0982965	0.0253052	0.00653024	1.08375	0.271606	0.0794288	0.0248112	0.00805208	3.87494	-4.70878	2.34158	-0.395386	0	2.0782	1.36289	2.83323	0	3.0967	0.655	-0.105185	-0.0416018	-0.0733936	2.875		-0.0845084	-0.0781522	3.28784		1.30394e-21	1.41886e-21	40.5265	1.06103	1.31766	0.73673	0.00122262	3.5664	-9.5564					-9.53626
0.3	502.329	0.75294	-6.08333	0.3	3.14159		0.391197	0.100478	0.0258669	0.00667519	1.1439	0.294884	0.0884373	0.0282977	0.00940147	3.87494	-4.70878	2.34158	-0.395386	0	2.07254	1.36289	2.92322	0	3.23989	0.655	-0.116744	-0.0461734	-0.0814588	2.875		-0.0888047	-0.0839847	3.44642		1.38191e-21	1.49703e-21	40.5265	1.06103	1.31766	0.75284	0.00129399	3.77457	-9.8579					-9.76469
0.3	598.198	0.77984	-6.11333	0.3	3.14159		0.405173	0.104068	0.0267911	0.00691367	1.25049	0.337339	0.105349	0.0350348	0.0120856	3.87494	-4.70878	2.34158	-0.395386	0	2.06322	1.36289	3.08096	0	3.48995	0.655	-0.139025	-0.0549855	-0.097005	2.875		-0.0962881	-0.0947867	3.72526		1.52176e-21	1.63526e-21	40.5265	1.06103	1.31766	0.77979	0.00142148	4.14645	-10.2598					-10.1421
0.3	800	0.82389		0.3	3.14159		0.42806	0.109947	0.0283044	0.0073042	1.44834	0.419823	0.139746	0.0493828	0.0180721	3.87494	-4.70878	2.34158	-0.395386	0	2.04796	1.36289	3.36845	0	3.94305	0.655	-0.185925	-0.0735349	-0.12973	2.875		-0.109769	-0.11627	4.23639		1.7864e-21	1.89086e-21	40.5265	1.06103	1.31766	0.82389	0.00166116	4.84561	-4.84561					-10.7644
0.3	1000	0.85761		0.3	3.14159		0.445579	0.114446	0.0294628	0.00760314	1.62263	0.49599	0.173036	0.0639343	0.0244336	3.87494	-4.70878	2.34158	-0.395386	0	2.03628	1.36289	3.6167	0	4.33198	0.655	-0.232406	-0.0919186	-0.162162	2.875		-0.121254	-0.136527	4.6807		2.02412e-21	2.11494e-21	40.5265	1.06103	1.31766	0.85761	0.00187503	5.46947	-5.46947					-11.2443
0.3	1200	0.88535		0.3	3.14159		0.459992	0.118148	0.0304158	0.00784907	1.78346	0.568831	0.206029	0.0788799	0.0312044	3.87494	-4.70878	2.34158	-0.395386	0	2.02667	1.36289	3.84209	0	4.68353	0.655	-0.278887	-0.110302	-0.194595	2.875		-0.131569	-0.156137	5.08634		2.24652e-21	2.3208e-21	40.5265	1.06103	1.31766	0.88535	0.00207413	6.05025	-6.05025					-11.6414
0.3	1400	0.90906		0.3	3.14159		0.472311	0.121312	0.0312304	0.00805927	1.93519	0.639577	0.239016	0.0942617	0.0383774	3.87494	-4.70878	2.34158	-0.395386	0	2.01846	1.36289	4.05183	0	5.00953	0.655	-0.325368	-0.128686	-0.227027	2.875		-0.141084	-0.175305	5.46552		2.45846e-21	2.51419e-21	40.5265	1.06103	1.31766	0.90906	0.00226314	6.60159	-6.60159					-11.9825
0.3	1600	0.92986		0.3	3.14159		0.483118	0.124088	0.0319449	0.00824367	2.08048	0.708993	0.272183	0.11011	0.0459505	3.87494	-4.70878	2.34158	-0.395386	0	2.01125	1.36289	4.25024	0	5.31703	0.655	-0.371849	-0.14707	-0.259459	2.875		-0.150023	-0.194156	5.82556		2.66287e-21	2.69862e-21	40.5265	1.06103	1.31766	0.92986	0.00244488	7.13173	-7.13173					-12.283
0.3	1800	0.94844		0.3	3.14159		0.492771	0.126568	0.0325832	0.00840839	2.22093	0.777536	0.305634	0.126435	0.053918	3.87494	-4.70878	2.34158	-0.395386	0	2.00482	1.36289	4.44	0	5.61041	0.655	-0.41833	-0.165453	-0.291892	2.875		-0.158525	-0.212764	6.17098		2.86154e-21	2.87622e-21	40.5265	1.06103	1.31766	0.94844	0.0026211	7.64574	-7.64574					-12.5524
0.3	2000	0.96528		0.3	3.14159		0.50152	0.128815	0.0331618	0.00855769	2.35781	0.845589	0.33947	0.143259	0.0622836	3.87494	-4.70878	2.34158	-0.395386	0	1.99899	1.36289	4.6231	0	5.89292	0.655	-0.464811	-0.183837	-0.324324	2.875		-0.166693	-0.231189	6.50515		3.05585e-21	3.04863e-21	40.5265	1.06103	1.31766	0.96528	0.0027931	8.14748	-8.14748					-12.7974
0.3	2200	0.98071		0.3	3.14159		0.509537	0.130874	0.0336919	0.00869448	2.49194	0.913402	0.373756	0.160594	0.0710479	3.87494	-4.70878	2.34158	-0.395386	0	1.99364	1.36289	4.80093	0	6.16678	0.655	-0.511293	-0.202221	-0.356757	2.875		-0.1746	-0.249469	6.83039		3.24673e-21	3.21697e-21	40.5265	1.06103	1.31766	0.98071	0.00296181	8.6396	-8.6396					-13.0226
0.3	2400	0.99498		0.3	3.14159		0.516951	0.132778	0.0341821	0.00882099	2.62404	0.981206	0.408559	0.178458	0.0802179	3.87494	-4.70878	2.34158	-0.395386	0	1.9887	1.36289	4.9746	0	6.43381	0.655	-0.557774	-0.220605	-0.389189	2.875		-0.182304	-0.267638	7.14857		3.43497e-21	3.38215e-21	40.5265	1.06103	1.31766	0.99498	0.00312796	9.12426	-9.12426					-13.2314
0.3	2600	1.0083		0.3	3.14159		0.523872	0.134556	0.0346397	0.00893908	2.75488	1.0493	0.443999	0.196903	0.089818	3.87494	-4.70878	2.34158	-0.395386	0	1.98409	1.36289	5.14526	0	6.69586	0.655	-0.604255	-0.238988	-0.421622	2.875		-0.189869	-0.285729	7.4616		3.62138e-21	3.54516e-21	40.5265	1.06103	1.31766	1.0083	0.00329235	9.60378	-9.60378					-13.4268
0.3	2800	1.0207		0.3	3.14159		0.530314	0.13621	0.0350657	0.00904902	2.88371	1.11721	0.479796	0.215773	0.0997652	3.87494	-4.70878	2.34158	-0.395386	0	1.97979	1.36289	5.31207	0	6.95166	0.655	-0.650736	-0.257372	-0.454054	2.875		-0.19724	-0.303714	7.76818		3.80525e-21	3.70515e-21	40.5265	1.06103	1.31766	1.0207	0.0034543	10.0762	-10.0762					-13.6092
0.3	3000	1.0324		0.3	3.14159		0.536393	0.137772	0.0354677	0.00915274	3.01192	1.1856	0.516272	0.235229	0.110143	3.87494	-4.70878	2.34158	-0.395386	0	1.97574	1.36289	5.47692	0	7.20418	0.655	-0.697217	-0.275756	-0.486486	2.875		-0.204527	-0.321652	8.07137		3.98802e-21	3.86382e-21	40.5265	1.06103	1.31766	1.0324	0.00361517	10.5455	-10.5455					-13.7816
0.2	5.77557	0.009285	0	0.2	3.14159		0.00460291	0.00117083	0.000298315	7.61429e-05	0.00464561	1.07245e-05	3.29599e-08	1.13888e-10	4.1946e-13	3.83331	-4.71447	2.36508	-0.403498	0	2.33026	1.36289	1.00946	0	0.0177576	0.655	-0.00134228	-0.000530882	-0.000936579	2.875		-0.000294977	-0.000564698	0.019316		6.38476e-24	5.89959e-24	40.5265	1.06103	1.31766	0.00964	5.71311e-06	0.0166651	-0.0166651					-0.0953935
0.2	15.3824	0.025878	-0.17667	0.2	3.14159		0.0128286	0.00326319	0.000831426	0.000212216	0.013165	8.51712e-05	7.31549e-07	7.05673e-09	7.25471e-11	3.83331	-4.71447	2.36508	-0.403498	0	2.32478	1.36289	1.02673	0	0.0500656	0.655	-0.00357496	-0.00141393	-0.00249444	2.875		-0.000849976	-0.00153953	0.0542887		1.78472e-23	1.67153e-23	40.5265	1.06103	1.31766	0.02515	1.60283e-05	0.0467545	-0.223424					-0.266791
0.2	30.6933	0.056155	-0.495	0.2	3.14159		0.027838	0.00708109	0.00180419	0.000460507	0.029463	0.000417813	7.8267e-06	1.64328e-07	3.67339e-09	3.83331	-4.71447	2.36508	-0.403498	0	2.31477	1.36289	1.0595	0	0.110989	0.655	-0.00713331	-0.00282129	-0.0049773	2.875		-0.0019559	-0.00321541	0.119708		3.90133e-23	3.74023e-23	40.5265	1.06103	1.31766	0.05672	3.52625e-05	0.102861	-0.597861					-0.582584
0.2	44.303	0.088792	-0.81333	0.2	3.14159		0.0440174	0.0111966	0.00285277	0.000728151	0.0481967	0.00109257	3.25387e-05	1.0838e-06	3.83925e-08	3.83331	-4.71447	2.36508	-0.403498	0	2.30399	1.36289	1.09675	0	0.179678	0.655	-0.0102963	-0.00407227	-0.00718428	2.875		-0.00328542	-0.0048964	0.192783		6.2363e-23	6.11892e-23	40.5265	1.06103	1.31766	0.08779	5.67331e-05	0.165491	-0.978821					-0.9274
0.2	60.9149	0.14123	-1.34333	0.2	3.14159		0.0700127	0.017809	0.00453753	0.00115818	0.0810934	0.00297603	0.000142226	7.57531e-06	4.28362e-07	3.83331	-4.71447	2.36508	-0.403498	0	2.28666	1.36289	1.16115	0	0.297159	0.655	-0.014157	-0.00559921	-0.00987809	2.875		-0.00572955	-0.00740173	0.316539		1.01614e-22	1.0302e-22	40.5265	1.06103	1.31766	0.14111	9.33069e-05	0.272176	-1.61551					-1.491
0.2	71.1221	0.18628	-1.73833	0.2	3.14159		0.0923456	0.0234897	0.00598493	0.00152761	0.112443	0.00552666	0.000351048	2.47767e-05	1.85377e-06	3.83331	-4.71447	2.36508	-0.403498	0	2.27177	1.36289	1.22143	0	0.405795	0.655	-0.0165292	-0.00653745	-0.0115333	2.875		-0.00814653	-0.00944649	0.43006		1.37712e-22	1.42982e-22	40.5265	1.06103	1.31766	0.18486	0.000127332	0.371426	-2.10976					-1.98462
0.2	81.5296	0.2532	-2.35167	0.2	3.14159		0.12552	0.0319283	0.00813498	0.0020764	0.165126	0.0112872	0.000985759	9.52323e-05	9.73086e-06	3.83331	-4.71447	2.36508	-0.403498	0	2.24965	1.36289	1.32062	0	0.582058	0.655	-0.0189479	-0.00749408	-0.013221	2.875		-0.0123204	-0.0124753	0.613226		1.96894e-22	2.10364e-22	40.5265	1.06103	1.31766	0.25519	0.000183601	0.535565	-2.88723					-2.73396
0.2	90.4359	0.33901	-3.01	0.2	3.14159		0.168059	0.0427488	0.0108919	0.0027801	0.245564	0.0231516	0.00274783	0.000358693	4.93796e-05	3.83331	-4.71447	2.36508	-0.403498	0	2.22129	1.36289	1.46764	0	0.83853	0.655	-0.0210178	-0.00831274	-0.0146653	2.875		-0.0188219	-0.016685	0.878898		2.85888e-22	3.13672e-22	40.5265	1.06103	1.31766	0.33083	0.000268734	0.783898	-3.7939					-3.72296
0.2	101.744	0.45342	-3.8	0.2	3.14159		0.224776	0.0571758	0.0145678	0.00371833	0.382147	0.0501611	0.0081255	0.00143651	0.000266784	3.83331	-4.71447	2.36508	-0.403498	0	2.18348	1.36289	1.7074	0	1.24704	0.655	-0.0236459	-0.00935216	-0.016499	2.875		-0.0299491	-0.023616	1.30232		4.3648e-22	4.89595e-22	40.5265	1.06103	1.31766	0.45118	0.000413082	1.20496	-5.00496					-5.09077
0.2	116.555	0.54016	-4.41667	0.2	3.14159		0.267777	0.0681136	0.0173546	0.00442965	0.515745	0.0831724	0.0163029	0.00346723	0.000772317	3.83331	-4.71447	2.36508	-0.403498	0	2.15482	1.36289	1.93243	0	1.62206	0.655	-0.0270879	-0.0107135	-0.0189007	2.875		-0.0407712	-0.0306222	1.69264		5.84608e-22	6.61554e-22	40.5265	1.06103	1.31766	0.53854	0.000554785	1.61831	-6.03498					-6.16524
0.2	130.464	0.58658	-4.73333	0.2	3.14159		0.290789	0.0739672	0.018846	0.00481033	0.601107	0.107033	0.0229765	0.00533478	0.00129523	3.83331	-4.71447	2.36508	-0.403498	0	2.13947	1.36289	2.07224	0	1.85181	0.655	-0.0303207	-0.0119921	-0.0211564	2.875		-0.0476056	-0.0353638	1.93304		6.80147e-22	7.7118e-22	40.5265	1.06103	1.31766	0.58232	0.000645844	1.88393	-6.61726					-6.75352
0.2	145.675	0.62127	-4.97	0.2	3.14159		0.307986	0.0783415	0.0199606	0.00509481	0.672517	0.128423	0.0293849	0.00725535	0.00187097	3.83331	-4.71447	2.36508	-0.403498	0	2.12801	1.36289	2.18713	0	2.03909	0.655	-0.0338558	-0.0133903	-0.023623	2.875		-0.0532595	-0.0395441	2.1299		7.60801e-22	8.62706e-22	40.5265	1.06103	1.31766	0.61924	0.00072245	2.10739	-7.07739					-7.19919
0.2	163.688	0.65148	-5.14333	0.2	3.14159		0.322962	0.082151	0.0209312	0.00534255	0.740753	0.149957	0.036182	0.00940119	0.00254854	3.83331	-4.71447	2.36508	-0.403498	0	2.11803	1.36289	2.29534	0	2.21435	0.655	-0.0380421	-0.015046	-0.026544	2.875		-0.0586012	-0.0437469	2.31499		8.38592e-22	9.49998e-22	40.5265	1.06103	1.31766	0.64948	0.00079608	2.32217	-7.4655					-7.59152
0.2	202.516	0.6971	-5.38	0.2	3.14159		0.345577	0.0879036	0.0223969	0.00571666	0.856	0.18851	0.0490839	0.0137205	0.0039951	3.83331	-4.71447	2.36508	-0.403498	0	2.10295	1.36289	2.47497	0	2.50314	0.655	-0.0470658	-0.018615	-0.0328404	2.875		-0.0674771	-0.0513494	2.62201		9.7174e-22	1.09706e-21	40.5265	1.06103	1.31766	0.69535	0.000921493	2.68799	-8.06799					-8.19139
0.2	251.451	0.73661	-5.58667	0.2	3.14159		0.365164	0.0928858	0.0236663	0.00604067	0.969515	0.228872	0.0634391	0.0188273	0.0058123	3.83331	-4.71447	2.36508	-0.403498	0	2.08989	1.36289	2.64845	0	2.77988	0.655	-0.0584386	-0.023113	-0.0407758	2.875		-0.0760349	-0.0594793	2.91876		1.10514e-21	1.24144e-21	40.5265	1.06103	1.31766	0.73424	0.00104637	3.05227	-8.63894					-8.71815
0.2	304.088	0.76826	-5.72833	0.2	3.14159		0.380854	0.0968768	0.0246832	0.00630022	1.07109	0.266775	0.0775844	0.024107	0.00778325	3.83331	-4.71447	2.36508	-0.403498	0	2.07943	1.36289	2.80113	0	3.0219	0.655	-0.0706718	-0.0279514	-0.0493116	2.875		-0.0835392	-0.0672852	3.1804		1.22637e-21	1.37024e-21	40.5265	1.06103	1.31766	0.76623	0.00115923	3.38147	-9.1098					-9.14495
0.2	352.323	0.7916	-5.81	0.2	3.14159		0.392424	0.09982	0.0254331	0.00649162	1.15287	0.298398	0.0898143	0.0288372	0.00961286	3.83331	-4.71447	2.36508	-0.403498	0	2.07172	1.36289	2.92244	0	3.21329	0.655	-0.0818818	-0.032385	-0.0571334	2.875		-0.0894779	-0.0739202	3.38871		1.32518e-21	1.47366e-21	40.5265	1.06103	1.31766	0.78952	0.00125081	3.6486	-9.4586					-9.46244
0.2	401.958	0.81195	-5.855	0.2	3.14159		0.402513	0.102386	0.0260869	0.0066585	1.22943	0.328832	0.101913	0.0336473	0.0115253	3.83331	-4.71447	2.36508	-0.403498	0	2.06499	1.36289	3.03482	0	3.38996	0.655	-0.0934173	-0.0369474	-0.0651824	2.875		-0.0949587	-0.0803999	3.58209		1.41861e-21	1.57026e-21	40.5265	1.06103	1.31766	0.81006	0.00133709	3.90029	-9.75529					-9.74117
0.2	452.894	0.83007	-5.88167	0.2	3.14159		0.411495	0.104671	0.0266691	0.0068071	1.30208	0.358408	0.113952	0.0385483	0.0135205	3.83331	-4.71447	2.36508	-0.403498	0	2.059	1.36289	3.14049	0	3.55554	0.655	-0.105255	-0.0416294	-0.0734423	2.875		-0.100092	-0.0867781	3.76426		1.50806e-21	1.66174e-21	40.5265	1.06103	1.31766	0.82822	0.00141943	4.14048	-10.0221					-9.99086
0.2	503.63	0.84604	-5.895	0.2	3.14159		0.419412	0.106685	0.0271822	0.00693806	1.3699	0.386586	0.12566	0.0434131	0.0155419	3.83331	-4.71447	2.36508	-0.403498	0	2.05373	1.36289	3.23828	0	3.7084	0.655	-0.117047	-0.046293	-0.0816698	2.875		-0.104826	-0.0929219	3.93321		1.59219e-21	1.74694e-21	40.5265	1.06103	1.31766	0.84429	0.00149666	4.36577	-10.2608					-10.2121
0.2	600.7	0.87239	-5.87	0.2	3.14159		0.432475	0.110008	0.0280287	0.00715415	1.49024	0.437854	0.147505	0.0527211	0.0195085	3.83331	-4.71447	2.36508	-0.403498	0	2.04502	1.36289	3.40999	0	3.97589	0.655	-0.139606	-0.0552155	-0.0974107	2.875		-0.113097	-0.104242	4.23062		1.74287e-21	1.89772e-21	40.5265	1.06103	1.31766	0.87062	0.00163451	4.76785	-10.6379					-10.5795
0.2	800	0.91521		0.2	3.14159		0.453702	0.115407	0.0294045	0.0075053	1.71118	0.535811	0.190943	0.0719871	0.0280551	3.83331	-4.71447	2.36508	-0.403498	0	2.03087	1.36289	3.71975	0	4.45597	0.655	-0.185925	-0.0735349	-0.12973	2.875		-0.127889	-0.126276	4.76967		2.02359e-21	2.17319e-21	40.5265	1.06103	1.31766	0.91521	0.00188989	5.5128						-11.1829
0.2	1000	0.94893		0.2	3.14159		0.470418	0.119659	0.0304879	0.00778183	1.91096	0.628156	0.233632	0.091724	0.0371811	3.83331	-4.71447	2.36508	-0.403498	0	2.01972	1.36289	3.99441	0	4.87944	0.655	-0.232406	-0.0919186	-0.162162	2.875		-0.140881	-0.147365	5.25023		2.28103e-21	2.42075e-21	40.5265	1.06103	1.31766	0.94893	0.00212278	6.19214						-11.6636
0.2	1200	0.97691		0.2	3.14159		0.484289	0.123187	0.0313868	0.00801128	2.09697	0.716968	0.276041	0.111976	0.046853	3.83331	-4.71447	2.36508	-0.403498	0	2.01047	1.36289	4.24605	0	5.26587	0.655	-0.278887	-0.110302	-0.194595	2.875		-0.152696	-0.167803	5.69243		2.52307e-21	2.64998e-21	40.5265	1.06103	1.31766	0.97691	0.00234081	6.82814						-12.0662
0.2	1400	1.001		0.2	3.14159		0.496231	0.126225	0.0321608	0.00820883	2.27393	0.803744	0.318594	0.132844	0.0570873	3.83331	-4.71447	2.36508	-0.403498	0	2.00251	1.36289	4.48218	0	5.62736	0.655	-0.325368	-0.128686	-0.227027	2.875		-0.163723	-0.187806	6.1088		2.7548e-21	2.86693e-21	40.5265	1.06103	1.31766	1.001	0.0025489	7.43515						-12.4156
0.2	1600	1.0222		0.2	3.14159		0.506741	0.128898	0.0328419	0.00838269	2.44416	0.889125	0.361419	0.154325	0.0678625	3.83331	-4.71447	2.36508	-0.403498	0	1.99551	1.36289	4.70658	0	5.97	0.655	-0.371849	-0.14707	-0.259459	2.875		-0.174155	-0.207481	6.50565		2.97875e-21	3.07462e-21	40.5265	1.06103	1.31766	1.0222	0.00274949	8.02026						-12.725
0.2	1800	1.0412		0.2	3.14159		0.51616	0.131294	0.0334524	0.0085385	2.60955	0.973723	0.404693	0.176461	0.0791864	3.83331	-4.71447	2.36508	-0.403498	0	1.98923	1.36289	4.92223	0	6.29856	0.655	-0.41833	-0.165453	-0.291892	2.875		-0.184149	-0.226914	6.88793		3.19695e-21	3.27546e-21	40.5265	1.06103	1.31766	1.0412	0.00294453	8.5892						-13.004
0.2	2000	1.0585		0.2	3.14159		0.524736	0.133476	0.0340082	0.00868037	2.77176	1.05815	0.448639	0.199336	0.0910936	3.83331	-4.71447	2.36508	-0.403498	0	1.98351	1.36289	5.13163	0	6.61702	0.655	-0.464811	-0.183837	-0.324324	2.875		-0.193837	-0.246178	7.25977		3.41115e-21	3.47156e-21	40.5265	1.06103	1.31766	1.0585	0.00313573	9.14692						-13.2594
0.2	2200	1.0743		0.2	3.14159		0.532569	0.135468	0.0345158	0.00880994	2.93048	1.14207	0.493006	0.222794	0.103496	3.83331	-4.71447	2.36508	-0.403498	0	1.97829	1.36289	5.33466	0	6.9253	0.655	-0.511293	-0.202221	-0.356757	2.875		-0.203205	-0.265265	7.62106		3.62116e-21	3.66266e-21	40.5265	1.06103	1.31766	1.0743	0.00332287	9.69283						-13.4938
0.2	2400	1.089		0.2	3.14159		0.539856	0.137322	0.0349881	0.00893049	3.08802	1.22655	0.538309	0.247088	0.116525	3.83331	-4.71447	2.36508	-0.403498	0	1.97343	1.36289	5.53447	0	7.22826	0.655	-0.557774	-0.220605	-0.389189	2.875		-0.212428	-0.284272	7.97687		3.82928e-21	3.85151e-21	40.5265	1.06103	1.31766	1.089	0.0035082	10.2334						-13.7128
0.2	2600	1.1027		0.2	3.14159		0.546648	0.139049	0.0354283	0.00904284	3.2441	1.31134	0.584378	0.272117	0.130123	3.83331	-4.71447	2.36508	-0.403498	0	1.9689	1.36289	5.73084	0	7.52565	0.655	-0.604255	-0.238988	-0.421622	2.875		-0.221492	-0.303191	8.32694		4.03531e-21	4.03786e-21	40.5265	1.06103	1.31766	1.1027	0.0036915	10.7681						-13.9177
0.2	2800	1.1156		0.2	3.14159		0.553043	0.140676	0.0358428	0.00914863	3.39986	1.39699	0.631475	0.298016	0.144364	3.83331	-4.71447	2.36508	-0.403498	0	1.96464	1.36289	5.92534	0	7.81988	0.655	-0.650736	-0.257372	-0.454054	2.875		-0.230482	-0.32207	8.67376		4.24037e-21	4.22308e-21	40.5265	1.06103	1.31766	1.1156	0.00387388	11.3001						-14.1114
0.2	3000	1.1277		0.2	3.14159		0.559041	0.142202	0.0362315	0.00924785	3.55429	1.48287	0.679228	0.32457	0.159131	3.83331	-4.71447	2.36508	-0.403498	0	1.96064	1.36289	6.1168	0	8.10923	0.655	-0.697217	-0.275756	-0.486486	2.875		-0.239327	-0.340868	9.01554		4.44355e-21	4.40604e-21	40.5265	1.06103	1.31766	1.1277	0.00405444	11.8268						-14.2938
0.1	6.07578	0.01047	0	0.1	3.14159		0.00499524	0.00126007	0.000318157	8.04154e-05	0.00504556	1.26439e-05	4.21766e-08	1.5817e-10	6.32661e-13	3.79785	-4.71854	2.38484	-0.410427	0	2.33	1.36289	1.01023	0	0.0191027	0.655	-0.00141205	-0.000558477	-0.000985262	2.875		-0.000316866	-0.000597671	0.0207496		6.80245e-24	6.30839e-24	40.5265	1.06103	1.31766	0.01034	6.09283e-06	0.0177728	-0.0177728				-0.070597	-0.0883698
0.1	15.7827	0.02863	-0.155	0.1	3.14159		0.0136594	0.00344563	0.000869995	0.000219894	0.0140412	9.67762e-05	8.85299e-07	9.09436e-09	9.95606e-11	3.79785	-4.71854	2.38484	-0.410427	0	2.32423	1.36289	1.02838	0	0.0528718	0.655	-0.00366799	-0.00145072	-0.00255936	2.875		-0.000897741	-0.00159375	0.0572336		1.86473e-23	1.75498e-23	40.5265	1.06103	1.31766	0.02906	1.67691e-05	0.0489154	-0.203915				-0.0394821	-0.243397
0.1	30.6933	0.06116	-0.48167	0.1	3.14159		0.0291794	0.00736063	0.0018585	0.000469743	0.0309689	0.000460746	9.05091e-06	1.99243e-07	4.66932e-09	3.79785	-4.71854	2.38484	-0.410427	0	2.31388	1.36289	1.06224	0	0.115463	0.655	-0.00713331	-0.00282129	-0.0049773	2.875		-0.00203876	-0.00326116	0.124274		4.00979e-23	3.86933e-23	40.5265	1.06103	1.31766	0.06191	3.63084e-05	0.105912	-0.587582				0.0609263	-0.526655
0.1	45.4038	0.1021	-0.87333	0.1	3.14159		0.0487119	0.0122878	0.00310257	0.000784185	0.0538731	0.0013558	4.47556e-05	1.65129e-06	6.47758e-08	3.79785	-4.71854	2.38484	-0.410427	0	2.30086	1.36289	1.10747	0	0.19831	0.655	-0.0105521	-0.00417345	-0.00736278	2.875		-0.00366192	-0.00518088	0.212072		6.77722e-23	6.73037e-23	40.5265	1.06103	1.31766	0.10081	6.18646e-05	0.180459	-1.05379				0.160508	-0.893281
0.1	60.5146	0.16362	-1.44167	0.1	3.14159		0.0780631	0.0196917	0.00497201	0.00125669	0.0920448	0.0037871	0.000202354	1.20372e-05	7.59791e-07	3.79785	-4.71854	2.38484	-0.410427	0	2.28129	1.36289	1.18149	0	0.33218	0.655	-0.0140639	-0.00556242	-0.00981318	2.875		-0.00650753	-0.00780347	0.35235		1.11623e-22	1.15051e-22	40.5265	1.06103	1.31766	0.16622	0.000102989	0.300419	-1.74209				0.276643	-1.46545
0.1	71.2222	0.24496	-2.14167	0.1	3.14159		0.11687	0.029481	0.00744373	0.00188143	0.150622	0.00952903	0.000772536	6.93627e-05	6.59086e-06	3.79785	-4.71854	2.38484	-0.410427	0	2.25542	1.36289	1.29217	0	0.528891	0.655	-0.0165524	-0.00654665	-0.0115495	2.875		-0.0110708	-0.0110682	0.556465		1.76033e-22	1.88567e-22	40.5265	1.06103	1.31766	0.24239	0.000164277	0.479197	-2.62087				0.35976	-2.26111
0.1	81.9298	0.51572	-4.05	0.1	3.14159		0.24605	0.0620671	0.0156715	0.00396102	0.444436	0.0648371	0.0115857	0.00225287	0.000459517	3.79785	-4.71854	2.38484	-0.410427	0	2.1693	1.36289	1.809	0	1.40867	0.655	-0.019041	-0.00753088	-0.0132859	2.875		-0.0347377	-0.0248817	1.46512		4.90503e-22	5.59733e-22	40.5265	1.06103	1.31766	0.54721	0.000466699	1.36136	-5.41136				0.180425	-5.23094
0.1	91.2365	0.61345	-4.57167	0.1	3.14159		0.292677	0.0738289	0.0186412	0.00471164	0.608611	0.109223	0.0236151	0.0055211	0.00134959	3.79785	-4.71854	2.38484	-0.410427	0	2.13822	1.36289	2.07831	0	1.85009	0.655	-0.0212039	-0.00838633	-0.0147951	2.875		-0.0478797	-0.0327861	1.92329		6.66595e-22	7.66597e-22	40.5265	1.06103	1.31766	0.61202	0.000635789	1.8546	-6.42627				0.0020187	-6.42425
0.1	101.744	0.65979	-4.83667	0.1	3.14159		0.314786	0.0794059	0.0200494	0.00506755	0.702762	0.137841	0.032318	0.0081688	0.00215546	3.79785	-4.71854	2.38484	-0.410427	0	2.12348	1.36289	2.22818	0	2.09229	0.655	-0.0236459	-0.00935216	-0.016499	2.875		-0.0553101	-0.03762	2.17608		7.68446e-22	8.84739e-22	40.5265	1.06103	1.31766	0.66064	0.000733198	2.13874	-6.97541				-0.0371643	-7.01257
0.1	115.654	0.69712	-5.02167	0.1	3.14159		0.332596	0.0838986	0.0211838	0.00535427	0.787941	0.165426	0.0412537	0.011064	0.00309378	3.79785	-4.71854	2.38484	-0.410427	0	2.1116	1.36289	2.36133	0	2.30575	0.655	-0.0268786	-0.0106307	-0.0187547	2.875		-0.061948	-0.0422531	2.39995		8.61411e-22	9.91302e-22	40.5265	1.06103	1.31766	0.69788	0.000821776	2.39712	-7.41879				-0.0782435	-7.49703
0.1	132.066	0.72753	-5.20333	0.1	3.14159		0.347104	0.0875585	0.0221078	0.00558783	0.864366	0.191407	0.0500874	0.014068	0.00411547	3.79785	-4.71854	2.38484	-0.410427	0	2.10193	1.36289	2.47902	0	2.49324	0.655	-0.0306928	-0.0121393	-0.021416	2.875		-0.0678297	-0.0466427	2.59754		9.45573e-22	1.08665e-21	40.5265	1.06103	1.31766	0.72742	0.000901672	2.63018	-7.83351				-0.0651236	-7.89863
0.1	146.076	0.74757	-5.305	0.1	3.14159		0.356666	0.0899703	0.0227168	0.00574175	0.918563	0.210481	0.0568005	0.0164309	0.00494718	3.79785	-4.71854	2.38484	-0.410427	0	2.09556	1.36289	2.56154	0	2.62411	0.655	-0.0339488	-0.0134271	-0.0236879	2.875		-0.0719569	-0.0498964	2.73603		1.00572e-21	1.15412e-21	40.5265	1.06103	1.31766	0.74747	0.000958594	2.79622	-8.10122				-0.0654681	-8.16669
0.1	162.087	0.76648	-5.38167	0.1	3.14159		0.365688	0.0922461	0.0232914	0.00588699	0.972744	0.230052	0.0638704	0.0189849	0.0058699	3.79785	-4.71854	2.38484	-0.410427	0	2.08954	1.36289	2.64331	0	2.75335	0.655	-0.0376699	-0.0148988	-0.0262844	2.875		-0.0760461	-0.0532683	2.87326		1.06624e-21	1.22144e-21	40.5265	1.06103	1.31766	0.76638	0.00101572	2.96287	-8.34454				-0.0775717	-8.42211
0.1	202.115	0.80289	-5.525	0.1	3.14159		0.383059	0.0966281	0.0243978	0.00616664	1.08621	0.272547	0.079789	0.0249491	0.0081049	3.79785	-4.71854	2.38484	-0.410427	0	2.07796	1.36289	2.81237	0	3.01926	0.655	-0.0469728	-0.0185782	-0.0327755	2.875		-0.0844899	-0.0607157	3.15717		1.19426e-21	1.36204e-21	40.5265	1.06103	1.31766	0.8028	0.0011361	3.31399	-8.83899				-0.0817081	-8.9207
0.1	251.551	0.83613	-5.635	0.1	3.14159		0.398918	0.100629	0.0254079	0.00642194	1.20155	0.317663	0.0974374	0.0318538	0.0108066	3.79785	-4.71854	2.38484	-0.410427	0	2.06739	1.36289	2.98148	0	3.28371	0.655	-0.0584618	-0.0231222	-0.040792	2.875		-0.0929131	-0.0688062	3.44159		1.32611e-21	1.50444e-21	40.5265	1.06103	1.31766	0.83639	0.00125945	3.67381	-9.30881				-0.0748735	-9.38368
0.1	302.287	0.86292	-5.71167	0.1	3.14159		0.411699	0.103853	0.026222	0.0066277	1.30378	0.359107	0.11424	0.0386668	0.0135693	3.79785	-4.71854	2.38484	-0.410427	0	2.05887	1.36289	3.12926	0	3.51369	0.655	-0.0702532	-0.0277858	-0.0490195	2.875		-0.100249	-0.0763869	3.69059		1.44431e-21	1.63019e-21	40.5265	1.06103	1.31766	0.86278	0.00136953	3.99491	-9.70658				-0.0556659	-9.76225
0.1	352.323	0.88485	-5.77833	0.1	3.14159		0.422162	0.106492	0.0268884	0.00679614	1.39433	0.396866	0.129986	0.0452334	0.0163079	3.79785	-4.71854	2.38484	-0.410427	0	2.05189	1.36289	3.25863	0	3.71427	0.655	-0.0818818	-0.032385	-0.0571334	2.875		-0.106651	-0.0834029	3.90899		1.54997e-21	1.74123e-21	40.5265	1.06103	1.31766	0.88472	0.00146757	4.2809	-10.0592				-0.0165033	-10.0757
0.1	404.26	0.90441	-5.82833	0.1	3.14159		0.431494	0.108846	0.0274828	0.00694637	1.48082	0.433784	0.145746	0.0519615	0.0191804	3.79785	-4.71854	2.38484	-0.410427	0	2.04567	1.36289	3.38097	0	3.90334	0.655	-0.0939522	-0.037159	-0.0655556	2.875		-0.112686	-0.0903486	4.11589		1.65166e-21	1.84698e-21	40.5265	1.06103	1.31766	0.90432	0.00156164	4.5553	-10.3836				0.0255448	-10.3581
0.1	452.294	0.92036	-5.85667	0.1	3.14159		0.439104	0.110766	0.0279675	0.00706887	1.55566	0.466366	0.159931	0.0581369	0.0218689	3.79785	-4.71854	2.38484	-0.410427	0	2.0406	1.36289	3.48593	0	4.06515	0.655	-0.105116	-0.0415742	-0.0733449	2.875		-0.117849	-0.0965413	4.29369		1.74022e-21	1.93826e-21	40.5265	1.06103	1.31766	0.92026	0.00164335	4.79366	-10.6503				0.0601064	-10.5902
0.1	504.531	0.93591	-5.905	0.1	3.14159		0.446523	0.112637	0.02844	0.00718831	1.63265	0.500458	0.175029	0.0648232	0.0248301	3.79785	-4.71854	2.38484	-0.410427	0	2.03565	1.36289	3.59305	0	4.22992	0.655	-0.117256	-0.0463758	-0.0818158	2.875		-0.123104	-0.103077	4.47547		1.83184e-21	2.03193e-21	40.5265	1.06103	1.31766	0.93604	0.00172768	5.03965	-10.9446				0.126448	-10.8182
0.1	600.099	0.96075	-5.915	0.1	3.14159		0.458374	0.115627	0.0291948	0.00737909	1.76454	0.560145	0.202041	0.0770484	0.0303634	3.79785	-4.71854	2.38484	-0.410427	0	2.02775	1.36289	3.77474	0	4.5086	0.655	-0.139466	-0.0551603	-0.0973134	2.875		-0.131985	-0.114631	4.78444		1.98985e-21	2.19188e-21	40.5265	1.06103	1.31766	0.96072	0.00187272	5.46271	-11.3777				0.191962	-11.1858
0.1	800	1.0026		0.1	3.14159		0.47834	0.120663	0.0304665	0.00770052	2.01477	0.677403	0.256997	0.102809	0.0424405	3.79785	-4.71854	2.38484	-0.410427	0	2.01444	1.36289	4.11365	0	5.02613	0.655	-0.185925	-0.0735349	-0.12973	2.875		-0.148453	-0.137631	5.36294		2.29275e-21	2.49358e-21	40.5265	1.06103	1.31766	1.0026	0.00214944	6.26993						-11.8144
0.1	1000	1.0359		0.1	3.14159		0.494228	0.124671	0.0314784	0.00795629	2.24307	0.78846	0.311025	0.129096	0.0552309	3.79785	-4.71854	2.38484	-0.410427	0	2.00385	1.36289	4.41699	0	5.48721	0.655	-0.232406	-0.0919186	-0.162162	2.875		-0.163097	-0.159631	5.88297		2.57182e-21	2.76688e-21	40.5265	1.06103	1.31766	1.0359	0.00240319	7.0101						-12.323
0.1	1200	1.0638		0.1	3.14159		0.507539	0.128029	0.0323263	0.00817057	2.45769	0.895983	0.364897	0.156089	0.068757	3.79785	-4.71854	2.38484	-0.410427	0	1.99497	1.36289	4.69765	0	5.91234	0.655	-0.278887	-0.110302	-0.194595	2.875		-0.176583	-0.180993	6.36574		2.83575e-21	3.02216e-21	40.5265	1.06103	1.31766	1.0638	0.00264233	7.70766						-12.755
0.1	1400	1.0879		0.1	3.14159		0.519037	0.130929	0.0330586	0.00835567	2.66268	1.00122	0.418927	0.183829	0.0829999	3.79785	-4.71854	2.38484	-0.410427	0	1.98731	1.36289	4.96208	0	6.31176	0.655	-0.325368	-0.128686	-0.227027	2.875		-0.189244	-0.201898	6.82189		3.08886e-21	3.26457e-21	40.5265	1.06103	1.31766	1.0879	0.00287104	8.37482						-13.1323
0.1	1600	1.1093		0.1	3.14159		0.529247	0.133505	0.0337089	0.00852004	2.86187	1.10564	0.473668	0.212527	0.0980452	3.79785	-4.71854	2.38484	-0.410427	0	1.9805	1.36289	5.21591	0	6.69433	0.655	-0.371849	-0.14707	-0.259459	2.875		-0.20138	-0.222514	7.26058		3.33511e-21	3.4988e-21	40.5265	1.06103	1.31766	1.1093	0.00309313	9.02265						-13.4706
0.1	1800	1.1285		0.1	3.14159		0.538407	0.135815	0.0342923	0.00866751	3.0559	1.20923	0.528974	0.242055	0.113811	3.79785	-4.71854	2.38484	-0.410427	0	1.9744	1.36289	5.46046	0	7.0622	0.655	-0.41833	-0.165453	-0.291892	2.875		-0.213051	-0.242873	7.68406		3.57526e-21	3.72578e-21	40.5265	1.06103	1.31766	1.1285	0.00330934	9.65335						-13.7768
0.1	2000	1.146		0.1	3.14159		0.546756	0.137921	0.0348241	0.00880191	3.24667	1.31275	0.585148	0.272538	0.130353	3.79785	-4.71854	2.38484	-0.410427	0	1.96883	1.36289	5.6985	0	7.41972	0.655	-0.464811	-0.183837	-0.324324	2.875		-0.224405	-0.263057	8.09683		3.81128e-21	3.94784e-21	40.5265	1.06103	1.31766	1.146	0.00352157	10.2724						-14.058
0.1	2200	1.1622		0.1	3.14159		0.554485	0.139871	0.0353164	0.00892634	3.43625	1.41714	0.642634	0.304195	0.147786	3.79785	-4.71854	2.38484	-0.410427	0	1.96368	1.36289	5.93285	0	7.77122	0.655	-0.511293	-0.202221	-0.356757	2.875		-0.2356	-0.283153	8.5034		4.04521e-21	4.1674e-21	40.5265	1.06103	1.31766	1.1622	0.00373178	10.8856						-14.3202
0.1	2400	1.1772		0.1	3.14159		0.561642	0.141676	0.0357722	0.00904155	3.6239	1.52187	0.701085	0.336817	0.165994	3.79785	-4.71854	2.38484	-0.410427	0	1.95891	1.36289	6.16282	0	8.11573	0.655	-0.557774	-0.220605	-0.389189	2.875		-0.246589	-0.303135	8.90275		4.27643e-21	4.38376e-21	40.5265	1.06103	1.31766	1.1772	0.00393939	11.4912						-14.5645
0.1	2600	1.1911		0.1	3.14159		0.568274	0.143349	0.0361946	0.00914831	3.80908	1.6265	0.760196	0.370216	0.184864	3.79785	-4.71854	2.38484	-0.410427	0	1.95448	1.36289	6.38792	0	8.4526	0.655	-0.604255	-0.238988	-0.421622	2.875		-0.257337	-0.322984	9.29418		4.50451e-21	4.59636e-21	40.5265	1.06103	1.31766	1.1911	0.00414396	12.0879						-14.7923
0.1	2800	1.2043		0.1	3.14159		0.574571	0.144938	0.0365957	0.00924969	3.99578	1.73319	0.821165	0.405057	0.204775	3.79785	-4.71854	2.38484	-0.410427	0	1.95029	1.36289	6.61313	0	8.78934	0.655	-0.650736	-0.257372	-0.454054	2.875		-0.268133	-0.34286	9.68554		4.73321e-21	4.80971e-21	40.5265	1.06103	1.31766	1.2043	0.00434913	12.6864						-15.0098
0.1	3000	1.2167		0.1	3.14159		0.580487	0.14643	0.0369725	0.00934493	4.18152	1.84046	0.883125	0.440843	0.225444	3.79785	-4.71854	2.38484	-0.410427	0	1.94634	1.36289	6.83556	0	9.12165	0.655	-0.697217	-0.275756	-0.486486	2.875		-0.278804	-0.362667	10.0723		4.96028e-21	5.02112e-21	40.5265	1.06103	1.31766	1.2167	0.00455273	13.2803						-15.2152
[truncated: 12 more columns]

## Sheet: Data Fabre 1992
Fabre and Oksengorn (1992)			(Experimental Raman data were recorded at room temperature 22 °C)
	pur CH4					CH4-N2 (55/45 mol%)
Pressure (bar)	P_CH4 (cm-1)	Density (g.cm-3)	Delta P_CH4 (cm-1)		Pressure	P_CH4	Density	Delta P_CH4
3.3	2916.66	0.00217	0		8.48651	2916.89	0.0074711	0
31.3212	2916.43	0.02167	-0.23056		25.3918	2916.8	0.022698	-0.08652
31.3212	2916.43	0.02167	-0.23056		25.3918	2916.66	0.022698	-0.2307
39.7292	2916.25	0.0279	-0.40603		38.0708	2916.54	0.034394	-0.35129
62.1503	2915.85	0.04539	-0.80936		43.7059	2916.42	0.03966	-0.46926
77.5649	2915.46	0.0581	-1.19958		52.1586	2916.26	0.047627	-0.62918
77.5649	2915.04	0.0581	-1.62123		73.2902	2916.01	0.067825	-0.88609
108.394	2914.55	0.08473	-2.1136		94.4218	2915.6	0.088239	-1.29243
132.216	2913.63	0.10571	-3.0317		115.553	2915.22	0.1086	-1.66732
185.467	2912.74	0.14955	-3.92069		150.773	2915.12	0.14169	-1.76956
224.704	2912.02	0.17656	-4.64352		150.773	2914.82	0.14169	-2.07366
402.672	2910.71	0.25178	-5.94777		159.226	2914.61	0.14936	-2.28076
426.494	2910.51	0.25834	-6.14943		201.489	2914.21	0.18557	-2.67924
464.33	2910.35	0.26779	-6.30919		235.299	2913.78	0.21158	-3.10917
518.981	2910.15	0.27977	-6.51085		262.066	2913.61	0.23027	-3.28482
541.402	2910.02	0.28421	-6.64179		343.775	2913.12	0.27796	-3.77243
719.37	2909.63	0.31284	-7.03202		402.944	2912.7	0.30544	-4.1945
835.68	2909.54	0.32727	-7.11845		455.068	2912.61	0.32602	-4.28363
881.924	2909.44	0.33237	-7.22059		583.267	2912.32	0.36649	-4.56938
1099.13	2909.32	0.35291	-7.33582		608.625	2912.2	0.37322	-4.68997
1284.1	2909.32	0.36722	-7.33582		656.523	2912.21	0.38507	-4.68211
1400.41	2909.24	0.37515	-7.42225		698.787	2911.99	0.39471	-4.90494
1501.31	2909.31	0.3815	-7.35154		793.175	2912.1	0.41394	-4.79222
1663.86	2909.24	0.3909	-7.42225		969.272	2911.91	0.44362	-4.98359
1749.34	2909.43	0.39548	-7.23368		942.505	2911.67	0.43952	-5.22477
1973.55	2909.52	0.40653	-7.13416		1084.79	2911.89	0.45996	-4.99932
2081.46	2909.7	0.41142	-6.95869		1238.35	2911.79	0.47894	-5.10418
2197.77	2909.6	0.41644	-7.06083		1380.63	2911.79	0.4944	-5.10418
2428.98	2909.83	0.42571	-6.83036		1376.41	2912.08	0.49396	-4.80795
2854.99	2910.19	0.44084	-6.46894		1615.9	2912.08	0.51662	-4.80795
2971.29	2910.21	0.44462	-6.45323		1689.16	2912.08	0.52287	-4.80795
					1641.26	2912.2	0.51881	-4.68997
					1993.45	2912.27	0.54618	-4.62444
					2062.48	2912.27	0.55098	-4.61657
					2156.87	2912.39	0.55729	-4.4986
					2075.16	2912.5	0.55184	-4.39374
					2425.95	2912.8	0.5739	-4.09226
					2516.11	2912.7	0.57908	-4.18664
					2658.39	2912.8	0.5869	-4.09226
